# Supplementary material for: The rate and spectrum of new mutations in mice inferred by long-read sequencing
Source: HighWire-hosted journal article supplement (doi:10.1101/gr.279982.124), 2024-12-02
Supplement: Supplemental_Table_S3.xlsx [file Supplemental_Table_S3.xlsx]

## Sheet: table_snm
# Table S3. List of single nucleotide mutations (SNMs) found in all mice samples and strains, with their corresponding reference (REF) and alternate or mutated allele (ALT). Coordinates are given by chromosome and position (site, with 1-based coordinates), based on their respective reference genomes.
# Coordinates for the GRCm39 reference genome were obtained following the Minigraph-Cactus pangenome pipeline, and the halLiftover tool (see Methods).
CHROM	SITE	REF	ALT	STRAIN	SAMPLE	GRCm39_COORDINATES
chromosome_01	2763381	T	A	BL6	2
chromosome_01	4118809	T	A	BL6	5	NC_000067.7:6497386
chromosome_01	13037000	T	C	BL6	2	NC_000067.7:15409608
chromosome_01	13657782	T	A	BL6	3	NC_000067.7:16030226
chromosome_01	16037418	G	A	BL6	3	NC_000067.7:18405076
chromosome_01	18547950	G	A	BL6	2	NC_000067.7:20914582
chromosome_01	24514337	G	A	BL6	4	NC_000067.7:26857126
chromosome_01	34113095	G	A	BL6	4	NC_000067.7:36443601
chromosome_01	36112363	T	C	BL6	3	NC_000067.7:38440404
chromosome_01	37205466	G	T	BL6	4	NC_000067.7:39532989
chromosome_01	38316738	C	A	BL6	4	NC_000067.7:40643581
chromosome_01	38507024	G	A	BL6	2	NC_000067.7:40833344
chromosome_01	39332181	C	T	BL6	2	NC_000067.7:41658230
chromosome_01	40571194	C	T	BL6	3	NC_000067.7:42896864
chromosome_01	41156967	A	C	BL6	3	NC_000067.7:43482552
chromosome_01	42891963	A	C	BL6	2	NC_000067.7:45212286
chromosome_01	47567597	G	T	BL6	4	NC_000067.7:49884996
chromosome_01	59408029	C	A	BL6	2	NC_000067.7:61720759
chromosome_01	65921202	T	C	BL6	5	NC_000067.7:68227103
chromosome_01	66432584	A	C	BL6	3	NC_000067.7:68738477
chromosome_01	69915485	G	A	BL6	3	NC_000067.7:72216951
chromosome_01	70494342	A	T	BL6	3	NC_000067.7:72795747
chromosome_01	72964289	G	A	BL6	2	NC_000067.7:75262111
chromosome_01	78334845	G	A	BL6	3	NC_000067.7:80620245
chromosome_01	81297896	G	A	BL6	5	NC_000067.7:83582241
chromosome_01	89469096	T	A	BL6	4	NC_000067.7:88770023
chromosome_01	91534756	G	A	BL6	3	NC_000067.7:90834592
chromosome_01	91840904	G	C	BL6	2	NC_000067.7:91140647
chromosome_01	94852962	A	G	BL6	3	NC_000067.7:94151131
chromosome_01	96585514	A	T	BL6	4	NC_000067.7:95883000
chromosome_01	100139721	T	C	BL6	2	NC_000067.7:99435785
chromosome_01	115033180	G	A	BL6	3	NC_000067.7:114307922
chromosome_01	117380097	G	A	BL6	2	NC_000067.7:116654591
chromosome_01	123141619	C	G	BL6	5	NC_000067.7:122414118
chromosome_01	124439329	C	G	BL6	3	NC_000067.7:123709221
chromosome_01	124717435	A	C	BL6	5	NC_000067.7:123984046
chromosome_01	125166700	C	A	BL6	2	NC_000067.7:124433142
chromosome_01	128294721	C	A	BL6	3	NC_000067.7:127559677
chromosome_01	129012380	C	A	BL6	3	NC_000067.7:128276252
chromosome_01	143524297	C	G	BL6	3	NC_000067.7:142770052
chromosome_01	144222031	A	C	BL6	3	NC_000067.7:143466152
chromosome_01	146348155	G	A	BL6	4	NC_000067.7:145591926
chromosome_01	146917947	G	A	BL6	3	NC_000067.7:146158270
chromosome_01	148868755	G	A	BL6	4	NC_000067.7:148094685
chromosome_01	151481356	G	A	BL6	3	NC_000067.7:150705977
chromosome_01	151852718	G	C	BL6	4	NC_000067.7:151077351
chromosome_01	153805128	A	T	BL6	3	NC_000067.7:153006190
chromosome_01	155891762	C	T	BL6	2	NC_000067.7:155090277
chromosome_01	162347995	C	T	BL6	4	NC_000067.7:161543193
chromosome_01	165209161	C	T	BL6	5	NC_000067.7:164402433
chromosome_01	169122820	G	A	BL6	5	NC_000067.7:168311414
chromosome_01	172070175	G	C	BL6	4	NC_000067.7:171211391
chromosome_01	182219534	G	C	BL6	3	NC_000067.7:181352486
chromosome_01	184389423	G	A	BL6	4	NC_000067.7:183514232
chromosome_01	192681027	A	C	BL6	2	NC_000067.7:191788654
chromosome_01	195181103	A	G	BL6	4	NC_000067.7:194285437
chromosome_02	868180	G	T	BL6	5	NC_000068.8:3918714
chromosome_02	1722273	G	A	BL6	4	NC_000068.8:4757948
chromosome_02	2114317	A	G	BL6	4	NC_000068.8:5149890
chromosome_02	12478489	T	G	BL6	5	NC_000068.8:15502472
chromosome_02	14377545	T	C	BL6	5	NC_000068.8:17400295
chromosome_02	29792273	C	T	BL6	2	NC_000068.8:32791746
chromosome_02	30248572	C	T	BL6	5	NC_000068.8:33248036
chromosome_02	40547192	T	G	BL6	5	NC_000068.8:43528898
chromosome_02	49625776	C	T	BL6	5
chromosome_02	50765072	C	A	BL6	2	NC_000068.8:53727425
chromosome_02	52280186	C	T	BL6	3	NC_000068.8:55242051
chromosome_02	58751154	A	T	BL6	4	NC_000068.8:61704471
chromosome_02	61615407	C	T	BL6	3	NC_000068.8:64567170
chromosome_02	62660285	G	A	BL6	2	NC_000068.8:65605536
chromosome_02	69478187	A	G	BL6	4	NC_000068.8:72407520
chromosome_02	70421652	T	A	BL6	2	NC_000068.8:73350595
chromosome_02	81076616	C	G	BL6	3	NC_000068.8:84003806
chromosome_02	86465268	G	A	BL6	3	NC_000068.8:89385033
chromosome_02	91475069	C	G	BL6	3	NC_000068.8:94468312
chromosome_02	92150928	T	C	BL6	5	NC_000068.8:95151037
chromosome_02	93026645	T	C	BL6	2	NC_000068.8:96026614
chromosome_02	93191693	T	C	BL6	4	NC_000068.8:96191654
chromosome_02	93779224	G	C	BL6	3	NC_000068.8:96779049
chromosome_02	94121934	A	G	BL6	3	NC_000068.8:97120764
chromosome_02	99508350	G	A	BL6	3	NC_000068.8:102504331
chromosome_02	108551896	A	T	BL6	2	NC_000068.8:111539766
chromosome_02	108664731	C	T	BL6	3	NC_000068.8:111652582
chromosome_02	109495839	T	A	BL6	3	NC_000068.8:112481260
chromosome_02	112309481	G	T	BL6	2	NC_000068.8:115294571
chromosome_02	117452218	T	G	BL6	2	NC_000068.8:120432811
chromosome_02	119904767	G	A	BL6	5	NC_000068.8:122884156
chromosome_02	121313740	G	T	BL6	2	NC_000068.8:124292842
chromosome_02	125727165	C	A	BL6	2	NC_000068.8:128704504
chromosome_02	128455210	G	A	BL6	4	NC_000068.8:131430947
chromosome_02	140021403	C	T	BL6	3	NC_000068.8:142982684
chromosome_02	140786737	C	A	BL6	3	NC_000068.8:143747406
chromosome_02	142188320	A	C	BL6	5	NC_000068.8:145149184
chromosome_02	143357832	C	T	BL6	4	NC_000068.8:146318580
chromosome_03	1278302	C	T	BL6	5	NC_000069.7:3943747
chromosome_03	4670616	C	T	BL6	2	NC_000069.7:7333047
chromosome_03	11454038	T	C	BL6	3	NC_000069.7:14104115
chromosome_03	17429743	C	T	BL6	3	NC_000069.7:20071964
chromosome_03	22567657	C	A	BL6	2	NC_000069.7:25208988
chromosome_03	30696866	T	G	BL6	5	NC_000069.7:33329521
chromosome_03	35949689	G	A	BL6	4	NC_000069.7:38577455
chromosome_03	38593685	C	T	BL6	4	NC_000069.7:41220163
chromosome_03	40369569	T	A	BL6	3	NC_000069.7:42995088
chromosome_03	43551033	C	T	BL6	4	NC_000069.7:46175861
chromosome_03	44974523	T	A	BL6	3	NC_000069.7:47598847
chromosome_03	52972911	A	C	BL6	4	NC_000069.7:55587675
chromosome_03	54483436	T	A	BL6	3	NC_000069.7:57097854
chromosome_03	59337177	G	A	BL6	3	NC_000069.7:61943237
chromosome_03	60469225	C	T	BL6	5	NC_000069.7:63066278
chromosome_03	62504468	G	A	BL6	2	NC_000069.7:65101450
chromosome_03	64735783	G	A	BL6	2	NC_000069.7:67331857
chromosome_03	66326648	G	A	BL6	3	NC_000069.7:68922561
chromosome_03	68429125	T	A	BL6	4	NC_000069.7:71024659
chromosome_03	69017839	A	G	BL6	2	NC_000069.7:71612035
chromosome_03	70258228	C	T	BL6	3	NC_000069.7:72852405
chromosome_03	71165096	T	G	BL6	4	NC_000069.7:73759048
chromosome_03	74785850	G	A	BL6	4	NC_000069.7:77378770
chromosome_03	74818551	A	C	BL6	2	NC_000069.7:77411466
chromosome_03	78469090	C	T	BL6	5	NC_000069.7:81043044
chromosome_03	81992342	A	C	BL6	3	NC_000069.7:84564630
chromosome_03	83861338	C	A	BL6	4	NC_000069.7:86433588
chromosome_03	88439950	C	T	BL6	2	NC_000069.7:91010342
chromosome_03	90605320	T	G	BL6	2	NC_000069.7:93124791
chromosome_03	91604950	T	A	BL6	3	NC_000069.7:94124755
chromosome_03	95709330	C	T	BL6	3	NC_000069.7:98210361
chromosome_03	109106320	C	T	BL6	3	NC_000069.7:111400972
chromosome_03	113205308	G	C	BL6	5	NC_000069.7:115495765
chromosome_03	123016648	C	T	BL6	5	NC_000069.7:125292442
chromosome_03	124547870	G	A	BL6	3	NC_000069.7:126823436
chromosome_03	128015093	C	T	BL6	3	NC_000069.7:130286827
chromosome_03	131024329	C	T	BL6	5	NC_000069.7:133293440
chromosome_03	131923932	G	C	BL6	3	NC_000069.7:134192529
chromosome_03	141356837	A	T	BL6	3	NC_000069.7:143617905
chromosome_03	144564015	C	T	BL6	5	NC_000069.7:146819527
chromosome_03	144980994	T	A	BL6	4	NC_000069.7:147236292
chromosome_03	147678033	C	T	BL6	3	NC_000069.7:149930974
chromosome_03	153873367	A	G	BL6	5	NC_000069.7:156120685
chromosome_03	154670933	G	A	BL6	2	NC_000069.7:156918229
chromosome_03	154846811	G	A	BL6	4	NC_000069.7:157093524
chromosome_03	157228707	C	G	BL6	2	NC_000069.7:159471748
chromosome_04	5991361	C	G	BL6	2	NC_000070.7:8297997
chromosome_04	11598865	A	T	BL6	3	NC_000070.7:13893642
chromosome_04	25161618	C	T	BL6	2	NC_000070.7:27436799
chromosome_04	25309409	T	G	BL6	5	NC_000070.7:27584576
chromosome_04	25518825	A	T	BL6	3	NC_000070.7:27793980
chromosome_04	27976256	A	G	BL6	3	NC_000070.7:30248555
chromosome_04	29262912	T	C	BL6	3	NC_000070.7:31533817
chromosome_04	31353370	G	A	BL6	4	NC_000070.7:33620195
chromosome_04	35633209	T	A	BL6	4	NC_000070.7:37900090
chromosome_04	51111937	G	A	BL6	5	NC_000070.7:53859238
chromosome_04	51657780	G	A	BL6	2	NC_000070.7:54404765
chromosome_04	51807655	T	C	BL6	3	NC_000070.7:54554637
chromosome_04	52806950	G	A	BL6	4	NC_000070.7:55552926
chromosome_04	58472862	G	A	BL6	3	NC_000070.7:61204243
chromosome_04	62254233	A	T	BL6	4	NC_000070.7:64977961
chromosome_04	63375636	C	A	BL6	4	NC_000070.7:66098705
chromosome_04	64439847	C	T	BL6	5	NC_000070.7:67162412
chromosome_04	74677729	T	A	BL6	4	NC_000070.7:77397198
chromosome_04	77876345	C	T	BL6	5	NC_000070.7:80595383
chromosome_04	84850183	A	G	BL6	5	NC_000070.7:87564376
chromosome_04	86809601	C	A	BL6	5	NC_000070.7:89507024
chromosome_04	88621368	T	A	BL6	3	NC_000070.7:91318731
chromosome_04	88963005	A	T	BL6	5	NC_000070.7:91660284
chromosome_04	92227735	A	T	BL6	3	NC_000070.7:94922594
chromosome_04	103851670	T	C	BL6	2	NC_000070.7:106531646
chromosome_04	112660300	A	C	BL6	2	NC_000070.7:115334824
chromosome_04	120389965	A	G	BL6	2	NC_000070.7:122918652
chromosome_04	132821617	G	A	BL6	4	NC_000070.7:135329707
chromosome_04	142711709	T	A	BL6	2	NC_000070.7:145199700
chromosome_05	5007607	G	A	BL6	2	NC_000071.7:7677419
chromosome_05	7312931	A	C	BL6	4	NC_000071.7:9982116
chromosome_05	8198654	G	A	BL6	3	NC_000071.7:10867326
chromosome_05	8198655	A	T	BL6	3	NC_000071.7:10867327
chromosome_05	9291057	A	G	BL6	2	NC_000071.7:11959658
chromosome_05	9319616	G	A	BL6	2	NC_000071.7:11988215
chromosome_05	10669129	T	C	BL6	2	NC_000071.7:13337697
chromosome_05	14368446	A	G	BL6	2	NC_000071.7:17030698
chromosome_05	17301235	C	A	BL6	2	NC_000071.7:19962359
chromosome_05	18251837	C	G	BL6	2	NC_000071.7:20912398
chromosome_05	22203579	C	T	BL6	2	NC_000071.7:24858400
chromosome_05	23973330	T	G	BL6	3	NC_000071.7:26519096
chromosome_05	28126852	A	T	BL6	3	NC_000071.7:30670773
chromosome_05	28501378	T	C	BL6	2	NC_000071.7:31045270
chromosome_05	30180110	G	A	BL6	4	NC_000071.7:32723681
chromosome_05	31347547	G	A	BL6	2	NC_000071.7:33888732
chromosome_05	34128806	C	G	BL6	4	NC_000071.7:36668886
chromosome_05	34249914	T	A	BL6	2
chromosome_05	34816426	G	A	BL6	5	NC_000071.7:37358420
chromosome_05	40389626	C	T	BL6	2	NC_000071.7:42926531
chromosome_05	53469720	C	G	BL6	3	NC_000071.7:55996897
chromosome_05	53846622	C	T	BL6	3	NC_000071.7:56373792
chromosome_05	54757304	G	A	BL6	3	NC_000071.7:57284270
chromosome_05	58659171	G	A	BL6	4	NC_000071.7:61185374
chromosome_05	69443362	T	A	BL6	3	NC_000071.7:71965282
chromosome_05	69487739	T	A	BL6	3	NC_000071.7:72009513
chromosome_05	69907745	C	T	BL6	5	NC_000071.7:72429249
chromosome_05	70306133	G	A	BL6	4	NC_000071.7:72827621
chromosome_05	70521592	C	A	BL6	3	NC_000071.7:73043058
chromosome_05	78740965	G	A	BL6	4	NC_000071.7:80731429
chromosome_05	80136610	G	T	BL6	4	NC_000071.7:82126942
chromosome_05	80576550	C	A	BL6	5	NC_000071.7:82566875
chromosome_05	83587535	G	A	BL6	3	NC_000071.7:85576237
chromosome_05	83724047	G	A	BL6	3	NC_000071.7:85712742
chromosome_05	85293884	T	A	BL6	4	NC_000071.7:87282440
chromosome_05	88092538	T	G	BL6	2	NC_000071.7:90080094
chromosome_05	88901405	C	T	BL6	4	NC_000071.7:90888946
chromosome_05	91838073	C	T	BL6	4	NC_000071.7:93823407
chromosome_05	96460078	G	A	BL6	4	NC_000071.7:96772873
chromosome_05	100167769	T	A	BL6	3	NC_000071.7:100476555
chromosome_05	103569842	C	G	BL6	5	NC_000071.7:103873546
chromosome_05	114594220	C	T	BL6	2	NC_000071.7:114886164
chromosome_05	116152729	A	T	BL6	5	NC_000071.7:116443790
chromosome_05	124436285	A	G	BL6	4	NC_000071.7:124721058
chromosome_05	128265075	G	T	BL6	4	NC_000071.7:128544926
chromosome_05	130267200	A	T	BL6	2	NC_000071.7:130543516
chromosome_05	130590347	T	A	BL6	4	NC_000071.7:130866644
chromosome_05	132483330	G	A	BL6	3	NC_000071.7:132758290
chromosome_05	132517668	C	T	BL6	2	NC_000071.7:132792702
chromosome_05	132943731	C	T	BL6	2	NC_000071.7:133217791
chromosome_05	139624147	G	A	BL6	5	NC_000071.7:139891821
chromosome_05	144544229	G	A	BL6	2	NC_000071.7:144807619
chromosome_05	147473173	G	T	BL6	3	NC_000071.7:147591677
chromosome_05	147942523	T	G	BL6	3	NC_000071.7:148060859
chromosome_06	1697031	G	A	BL6	4	NC_000072.7:4234533
chromosome_06	2885817	C	T	BL6	5	NC_000072.7:5420438
chromosome_06	6241612	C	T	BL6	5	NC_000072.7:8773876
chromosome_06	16788981	A	T	BL6	3	NC_000072.7:19310793
chromosome_06	22909005	T	C	BL6	5	NC_000072.7:25428320
chromosome_06	24522859	G	A	BL6	4	NC_000072.7:27032117
chromosome_06	25048574	G	A	BL6	3	NC_000072.7:27557825
chromosome_06	28399864	C	A	BL6	5	NC_000072.7:30896297
chromosome_06	31140334	G	A	BL6	5	NC_000072.7:33635586
chromosome_06	33275888	G	T	BL6	5	NC_000072.7:35770230
chromosome_06	47101673	A	T	BL6	3	NC_000072.7:49206145
chromosome_06	56696146	G	A	BL6	4	NC_000072.7:58792985
chromosome_06	57863689	G	A	BL6	4	NC_000072.7:59958588
chromosome_06	59935057	C	T	BL6	2	NC_000072.7:62029356
chromosome_06	62345482	C	T	BL6	2	NC_000072.7:64438913
chromosome_06	65004045	C	T	BL6	5	NC_000072.7:67100130
chromosome_06	71745421	C	A	BL6	2	NC_000072.7:73838408
chromosome_06	72451870	C	T	BL6	4	NC_000072.7:74544606
chromosome_06	74612389	C	T	BL6	3	NC_000072.7:76704407
chromosome_06	77007192	G	T	BL6	2	NC_000072.7:79098241
chromosome_06	82115154	A	T	BL6	2	NC_000072.7:84203771
chromosome_06	87598765	C	T	BL6	5	NC_000072.7:89678191
chromosome_06	97916929	T	G	BL6	5	NC_000072.7:99984629
chromosome_06	98759104	G	T	BL6	5	NC_000072.7:100825987
chromosome_06	100815542	A	G	BL6	2	NC_000072.7:102881655
chromosome_06	105149057	G	A	BL6	3	NC_000072.7:107212203
chromosome_06	105980120	A	C	BL6	2	NC_000072.7:108042825
chromosome_06	109409447	C	A	BL6	4	NC_000072.7:111467533
chromosome_06	110883534	A	C	BL6	2	NC_000072.7:112941029
chromosome_06	111322364	G	A	BL6	2	NC_000072.7:113378812
chromosome_06	112206634	G	A	BL6	5	NC_000072.7:114262895
chromosome_06	115528897	A	G	BL6	5	NC_000072.7:117587295
chromosome_06	118476833	G	C	BL6	3	NC_000072.7:120534413
chromosome_06	118552253	C	A	BL6	5	NC_000072.7:120609500
chromosome_06	120981617	T	C	BL6	5	NC_000072.7:123029272
chromosome_06	121564761	G	A	BL6	4	NC_000072.7:123612166
chromosome_06	122439837	A	G	BL6	2	NC_000072.7:124486703
chromosome_06	128350994	G	T	BL6	2	NC_000072.7:130394859
chromosome_06	129537225	G	A	BL6	2	NC_000072.7:131580987
chromosome_07	368315	C	T	BL6	5	NC_000073.7:3329544
chromosome_07	2141150	G	C	BL6	5	NC_000073.7:5097378
chromosome_07	5405583	C	G	BL6	3	NC_000073.7:8360298
chromosome_07	9101251	C	G	BL6	2	NC_000073.7:12030839
chromosome_07	21474681	C	T	BL6	5	NC_000073.7:24555644
chromosome_07	23530842	G	T	BL6	3	NC_000073.7:26609678
chromosome_07	26266332	C	T	BL6	4	NC_000073.7:29344157
chromosome_07	26646387	G	A	BL6	4	NC_000073.7:29723802
chromosome_07	27564467	T	A	BL6	3	NC_000073.7:30641484
chromosome_07	30811792	T	G	BL6	5	NC_000073.7:33884599
chromosome_07	32964798	A	G	BL6	2	NC_000073.7:36031045
chromosome_07	35819245	C	G	BL6	5	NC_000073.7:38822044
chromosome_07	37278724	T	C	BL6	2	NC_000073.7:40279139
chromosome_07	37948220	T	G	BL6	4	NC_000073.7:40948405
chromosome_07	38796543	C	T	BL6	4	NC_000073.7:41796616
chromosome_07	41404577	T	C	BL6	5	NC_000073.7:44321523
chromosome_07	43880457	T	C	BL6	5	NC_000073.7:46794689
chromosome_07	58593497	C	T	BL6	5	NC_000073.7:61337721
chromosome_07	59468693	A	T	BL6	4	NC_000073.7:62206137
chromosome_07	60697863	G	A	BL6	4	NC_000073.7:63434845
chromosome_07	66981209	C	T	BL6	5	NC_000073.7:69686219
chromosome_07	68031074	G	C	BL6	3	NC_000073.7:70735857
chromosome_07	68795623	G	T	BL6	3	NC_000073.7:71499680
chromosome_07	79162935	G	A	BL6	2	NC_000073.7:81854083
chromosome_07	87349212	C	A	BL6	4	NC_000073.7:90037500
chromosome_07	90449608	T	A	BL6	3	NC_000073.7:93132137
chromosome_07	91363141	A	T	BL6	2	NC_000073.7:94045628
chromosome_07	105518809	T	C	BL6	4	NC_000073.7:108145937
chromosome_07	105518817	G	C	BL6	4	NC_000073.7:108145945
chromosome_07	105518819	G	A	BL6	4	NC_000073.7:108145947
chromosome_07	105518849	G	A	BL6	4	NC_000073.7:108145977
chromosome_07	109051288	G	A	BL6	5	NC_000073.7:111675959
chromosome_07	109164956	C	T	BL6	2	NC_000073.7:111789621
chromosome_07	128892529	G	A	BL6	3	NC_000073.7:131488925
chromosome_07	129225665	A	C	BL6	2	NC_000073.7:131822039
chromosome_07	140930930	T	A	BL6	5	NC_000073.7:143518076
chromosome_07	140930932	G	A	BL6	5	NC_000073.7:143518078
chromosome_08	4931674	T	G	BL6	3	NC_000074.7:7830351
chromosome_08	7258732	C	T	BL6	3	NC_000074.7:10156274
chromosome_08	13122350	C	T	BL6	4	NC_000074.7:16004324
chromosome_08	29015188	C	T	BL6	5	NC_000074.7:30511985
chromosome_08	29450318	T	C	BL6	2	NC_000074.7:30946919
chromosome_08	36402284	G	A	BL6	5	NC_000074.7:37896269
chromosome_08	39991344	G	A	BL6	5	NC_000074.7:41482700
chromosome_08	41277487	C	T	BL6	4	NC_000074.7:42768620
chromosome_08	41381959	G	T	BL6	5	NC_000074.7:42873072
chromosome_08	41862672	G	A	BL6	4	NC_000074.7:43353753
chromosome_08	43321580	T	A	BL6	5	NC_000074.7:44812613
chromosome_08	45024228	A	G	BL6	2	NC_000074.7:46514494
chromosome_08	50945582	C	T	BL6	2	NC_000074.7:52406960
chromosome_08	52010479	C	A	BL6	4	NC_000074.7:53472108
chromosome_08	53027812	T	A	BL6	2	NC_000074.7:54489368
chromosome_08	58351851	G	A	BL6	4	NC_000074.7:59822505
chromosome_08	63432438	A	G	BL6	5	NC_000074.7:64900079
chromosome_08	65136396	G	T	BL6	4	NC_000074.7:66603430
chromosome_08	65905255	C	T	BL6	2	NC_000074.7:67371802
chromosome_08	69055209	C	A	BL6	4	NC_000074.7:70528016
chromosome_08	83381282	C	T	BL6	3	NC_000074.7:84843004
chromosome_08	93641759	C	T	BL6	2	NC_000074.7:95094964
chromosome_08	97046145	A	G	BL6	4	NC_000074.7:98499000
chromosome_08	98455986	C	T	BL6	4	NC_000074.7:99908024
chromosome_08	101891226	C	A	BL6	2	NC_000074.7:103342259
chromosome_08	103492286	C	T	BL6	2	NC_000074.7:104942897
chromosome_08	107463323	G	A	BL6	5	NC_000074.7:108912433
chromosome_08	111401419	A	T	BL6	3	NC_000074.7:112848339
chromosome_08	123769403	G	T	BL6	3	NC_000074.7:125157068
chromosome_08	124847647	G	T	BL6	5	NC_000074.7:126234335
chromosome_08	124975918	C	T	BL6	4	NC_000074.7:126362169
chromosome_08	125158579	A	T	BL6	3	NC_000074.7:126544681
chromosome_08	127200676	C	T	BL6	4	NC_000074.7:128585352
chromosome_09	5759510	G	A	BL6	3	NC_000075.7:8507661
chromosome_09	7042482	G	A	BL6	2	NC_000075.7:9790372
chromosome_09	7042483	T	A	BL6	2	NC_000075.7:9790373
chromosome_09	18976274	A	G	BL6	4	NC_000075.7:21718418
chromosome_09	25307795	T	C	BL6	3	NC_000075.7:28044471
chromosome_09	26463489	T	C	BL6	5	NC_000075.7:29199658
chromosome_09	28687362	G	A	BL6	2	NC_000075.7:31414629
chromosome_09	29077847	T	C	BL6	3	NC_000075.7:31804265
chromosome_09	32292678	C	T	BL6	4	NC_000075.7:35016049
chromosome_09	45835940	A	G	BL6	3	NC_000075.7:48545561
chromosome_09	47114313	G	T	BL6	5	NC_000075.7:49821475
chromosome_09	51705788	G	A	BL6	5	NC_000075.7:54404274
chromosome_09	62199371	G	T	BL6	4	NC_000075.7:64889390
chromosome_09	72042644	T	G	BL6	3	NC_000075.7:74725818
chromosome_09	72168105	A	G	BL6	4	NC_000075.7:74851265
chromosome_09	75747297	G	A	BL6	4	NC_000075.7:78420397
chromosome_09	84377422	G	A	BL6	4	NC_000075.7:87045528
chromosome_09	84796787	C	T	BL6	4	NC_000075.7:87464935
chromosome_09	85814210	A	T	BL6	2	NC_000075.7:88481699
chromosome_09	88934801	G	C	BL6	2	NC_000075.7:91602093
chromosome_09	92818813	C	T	BL6	2	NC_000075.7:95484289
chromosome_09	97300398	C	T	BL6	3	NC_000075.7:99963982
chromosome_09	98227616	G	A	BL6	4	NC_000075.7:100890834
chromosome_09	104848693	G	A	BL6	4	NC_000075.7:107500691
chromosome_09	105955108	T	G	BL6	5	NC_000075.7:108604525
chromosome_09	106990562	G	T	BL6	5	NC_000075.7:109639058
chromosome_09	107714733	C	G	BL6	3	NC_000075.7:110362248
chromosome_09	108548097	C	G	BL6	3	NC_000075.7:111195564
chromosome_09	113349529	G	C	BL6	3	NC_000075.7:115993704
chromosome_09	118070037	A	T	BL6	3	NC_000075.7:120703906
chromosome_10	5593403	A	T	BL6	2	NC_000076.7:8570599
chromosome_10	11979079	C	T	BL6	4	NC_000076.7:14949290
chromosome_10	13508260	G	A	BL6	5	NC_000076.7:16474582
chromosome_10	14682496	C	T	BL6	5	NC_000076.7:17647498
chromosome_10	29293043	T	A	BL6	5	NC_000076.7:32247738
chromosome_10	33967324	C	T	BL6	3	NC_000076.7:36912276
chromosome_10	35327441	A	C	BL6	5	NC_000076.7:38272342
chromosome_10	36334433	T	A	BL6	3	NC_000076.7:39279289
chromosome_10	37014580	A	C	BL6	3	NC_000076.7:39959417
chromosome_10	37231601	C	G	BL6	3	NC_000076.7:40176528
chromosome_10	45121812	C	T	BL6	5	NC_000076.7:48059281
chromosome_10	47055761	C	A	BL6	4	NC_000076.7:49992759
chromosome_10	48229997	T	C	BL6	3	NC_000076.7:51166589
chromosome_10	53311086	C	T	BL6	4	NC_000076.7:56245412
chromosome_10	71046863	G	T	BL6	2	NC_000076.7:73971320
chromosome_10	77961365	G	A	BL6	2	NC_000076.7:80880405
chromosome_10	82507746	C	T	BL6	3	NC_000076.7:85421593
chromosome_10	85061633	G	A	BL6	2	NC_000076.7:87974501
chromosome_10	86235485	C	A	BL6	5	NC_000076.7:89148349
chromosome_10	89833065	G	A	BL6	2	NC_000076.7:92745207
chromosome_10	108773226	G	T	BL6	3	NC_000076.7:111679070
chromosome_10	110509785	C	A	BL6	3	NC_000076.7:113414581
chromosome_10	115126310	A	C	BL6	3	NC_000076.7:118028123
chromosome_10	120193981	T	G	BL6	2	NC_000076.7:123090607
chromosome_10	124330539	C	T	BL6	2	NC_000076.7:127221797
chromosome_11	1618354	G	A	BL6	3	NC_000077.7:4575245
chromosome_11	3675741	G	T	BL6	5	NC_000077.7:6629405
chromosome_11	4426495	G	A	BL6	3	NC_000077.7:7379333
chromosome_11	5066357	C	T	BL6	2	NC_000077.7:8019172
chromosome_11	9717308	G	A	BL6	2	NC_000077.7:12667814
chromosome_11	9999173	A	C	BL6	2	NC_000077.7:12943337
chromosome_11	11677302	C	T	BL6	3	NC_000077.7:14620703
chromosome_11	23304938	C	T	BL6	2	NC_000077.7:26234201
chromosome_11	25036606	G	A	BL6	5	NC_000077.7:28002635
chromosome_11	28037083	A	C	BL6	2	NC_000077.7:31001484
chromosome_11	29632592	C	G	BL6	5	NC_000077.7:32593346
chromosome_11	38508525	A	G	BL6	2	NC_000077.7:41451230
chromosome_11	38581601	T	C	BL6	5
chromosome_11	38734234	G	A	BL6	2	NC_000077.7:41675164
chromosome_11	38820523	C	T	BL6	4	NC_000077.7:41761061
chromosome_11	39748784	A	G	BL6	2	NC_000077.7:42689102
chromosome_11	42346352	G	A	BL6	5	NC_000077.7:45284465
chromosome_11	47806347	C	T	BL6	3	NC_000077.7:50740748
chromosome_11	48476838	C	T	BL6	4	NC_000077.7:51410957
chromosome_11	49976946	C	T	BL6	2	NC_000077.7:52908437
chromosome_11	50140308	C	G	BL6	5	NC_000077.7:53071783
chromosome_11	53058731	C	G	BL6	2	NC_000077.7:55986922
chromosome_11	53375585	C	T	BL6	4	NC_000077.7:56304119
chromosome_11	59276612	A	C	BL6	5	NC_000077.7:62207452
chromosome_11	65642732	C	T	BL6	2	NC_000077.7:68567638
chromosome_11	70765279	G	C	BL6	2	NC_000077.7:73688507
chromosome_11	71327992	T	A	BL6	5	NC_000077.7:74251223
chromosome_11	71738399	C	T	BL6	2	NC_000077.7:74661625
chromosome_11	74169773	G	A	BL6	2	NC_000077.7:77092074
chromosome_11	75142161	C	T	BL6	4	NC_000077.7:78064322
chromosome_11	79606486	G	A	BL6	2	NC_000077.7:82522753
chromosome_11	98425640	C	T	BL6	4	NC_000077.7:101297776
chromosome_11	105178957	A	C	BL6	4	NC_000077.7:108053761
chromosome_11	108406988	T	C	BL6	4	NC_000077.7:111278253
chromosome_12	1361330	T	C	BL6	2
chromosome_12	1361828	T	C	BL6	5
chromosome_12	3184794	C	G	BL6	4	NC_000078.7:6083323
chromosome_12	3184798	C	G	BL6	4	NC_000078.7:6083327
chromosome_12	19171281	T	G	BL6	4	NC_000078.7:22052270
chromosome_12	26167383	G	A	BL6	2	NC_000078.7:29044668
chromosome_12	26395256	G	A	BL6	3	NC_000078.7:29272522
chromosome_12	32189803	C	A	BL6	3	NC_000078.7:35061814
chromosome_12	44605094	C	T	BL6	5	NC_000078.7:47452014
chromosome_12	52409463	T	A	BL6	3	NC_000078.7:55258665
chromosome_12	61070347	G	A	BL6	2	NC_000078.7:63972106
chromosome_12	68480873	T	C	BL6	3	NC_000078.7:71373996
chromosome_12	71844405	C	T	BL6	4	NC_000078.7:74734182
chromosome_12	76951248	T	A	BL6	5	NC_000078.7:79839829
chromosome_12	79571076	T	C	BL6	3	NC_000078.7:82458036
chromosome_12	81150994	G	T	BL6	3	NC_000078.7:84037360
chromosome_12	90662604	G	A	BL6	3	NC_000078.7:93490015
chromosome_12	91120649	A	T	BL6	4	NC_000078.7:93948010
chromosome_12	93912824	C	T	BL6	4	NC_000078.7:96739085
chromosome_12	94936075	G	T	BL6	4	NC_000078.7:97761440
chromosome_12	95386898	G	A	BL6	3	NC_000078.7:98212123
chromosome_12	100014548	T	C	BL6	2	NC_000078.7:102836518
chromosome_12	100169892	T	G	BL6	3	NC_000078.7:102991861
chromosome_12	100876467	G	T	BL6	2	NC_000078.7:103698424
chromosome_12	104873128	T	A	BL6	4	NC_000078.7:107656558
chromosome_12	109516738	G	A	BL6	4	NC_000078.7:112294549
chromosome_12	111745864	T	C	BL6	3	NC_000078.7:114513637
chromosome_12	111809783	C	T	BL6	2	NC_000078.7:114577551
chromosome_12	112504994	A	C	BL6	5	NC_000078.7:115272092
chromosome_13	8820829	C	T	BL6	4	NC_000079.7:11146687
chromosome_13	14876307	C	T	BL6	5	NC_000079.7:17192413
chromosome_13	15827414	G	A	BL6	4	NC_000079.7:18143352
chromosome_13	20149258	A	C	BL6	2	NC_000079.7:22463906
chromosome_13	26752447	C	T	BL6	2	NC_000079.7:29060916
chromosome_13	29916030	C	T	BL6	5	NC_000079.7:32222084
chromosome_13	31386781	C	T	BL6	2	NC_000079.7:33692699
chromosome_13	33395314	G	A	BL6	3	NC_000079.7:35699999
chromosome_13	33797578	T	G	BL6	4	NC_000079.7:36102237
chromosome_13	40243094	C	T	BL6	5	NC_000079.7:42538083
chromosome_13	46259295	C	T	BL6	2	NC_000079.7:48551432
chromosome_13	48128217	G	A	BL6	2	NC_000079.7:50418893
chromosome_13	54183393	T	C	BL6	4	NC_000079.7:56470523
chromosome_13	57084915	A	C	BL6	5	NC_000079.7:59367832
chromosome_13	57246831	C	A	BL6	4	NC_000079.7:59529723
chromosome_13	59981119	T	C	BL6	5	NC_000079.7:62261184
chromosome_13	63734619	A	C	BL6	3	NC_000079.7:66012833
chromosome_13	63734625	T	C	BL6	3	NC_000079.7:66012839
chromosome_13	64241189	C	G	BL6	2	NC_000079.7:66518767
chromosome_13	65746126	G	A	BL6	5	NC_000079.7:68022939
chromosome_13	66556772	T	C	BL6	4	NC_000079.7:68833375
chromosome_13	67592813	A	G	BL6	3	NC_000079.7:69868172
chromosome_13	69223453	G	A	BL6	4	NC_000079.7:71497314
chromosome_13	69348448	C	T	BL6	4	NC_000079.7:71622299
chromosome_13	84049969	C	T	BL6	3	NC_000079.7:86316092
chromosome_13	84459479	C	A	BL6	3	NC_000079.7:86724919
chromosome_13	86329592	C	G	BL6	4	NC_000079.7:88594589
chromosome_13	87678787	G	A	BL6	4	NC_000079.7:89943317
chromosome_13	87830102	C	G	BL6	3	NC_000079.7:90094618
chromosome_13	89883958	G	A	BL6	5	NC_000079.7:92147642
chromosome_13	91507833	C	T	BL6	3	NC_000079.7:93770328
chromosome_13	93477912	C	T	BL6	4	NC_000079.7:95737784
chromosome_13	98261796	C	T	BL6	3	NC_000079.7:100516605
chromosome_13	101868634	T	G	BL6	4	NC_000079.7:104112369
chromosome_13	102589933	G	A	BL6	3	NC_000079.7:104833265
chromosome_13	107943692	G	C	BL6	5	NC_000079.7:110178880
chromosome_13	112842128	G	T	BL6	3	NC_000079.7:115071299
chromosome_13	117349815	C	A	BL6	3	NC_000079.7:119578134
chromosome_14	1826402	G	T	BL6	3	NC_000080.7:4652783
chromosome_14	13677816	G	A	BL6	3
chromosome_14	46913228	A	C	BL6	5	NC_000080.7:50365839
chromosome_14	56578816	C	T	BL6	2	NC_000080.7:59904759
chromosome_14	57100030	A	C	BL6	4	NC_000080.7:60424766
chromosome_14	71855800	G	T	BL6	4	NC_000080.7:75166484
chromosome_14	72255009	C	A	BL6	5	NC_000080.7:75565538
chromosome_14	74675696	G	T	BL6	2	NC_000080.7:77985430
chromosome_14	77758208	G	A	BL6	5	NC_000080.7:81066101
chromosome_14	83541432	C	A	BL6	4	NC_000080.7:86847330
chromosome_14	83840169	G	A	BL6	5	NC_000080.7:87146112
chromosome_14	84863302	G	T	BL6	5	NC_000080.7:88168858
chromosome_14	86460070	T	C	BL6	2	NC_000080.7:89765507
chromosome_14	94786084	C	G	BL6	5	NC_000080.7:98089604
chromosome_14	100352428	G	A	BL6	2	NC_000080.7:103648264
chromosome_14	102046760	T	G	BL6	2	NC_000080.7:105341302
chromosome_14	102068805	T	C	BL6	4	NC_000080.7:105363347
chromosome_14	103997522	G	A	BL6	3	NC_000080.7:107292052
chromosome_14	110247222	C	A	BL6	3	NC_000080.7:113529757
chromosome_14	111663877	C	A	BL6	3	NC_000080.7:114945987
chromosome_14	117738188	G	C	BL6	5	NC_000080.7:121016327
chromosome_14	121376037	G	A	BL6	5	NC_000080.7:124652741
chromosome_15	6007153	G	A	BL6	3	NC_000081.7:8430474
chromosome_15	6328121	G	C	BL6	3	NC_000081.7:8751231
chromosome_15	9724444	A	C	BL6	2	NC_000081.7:12127371
chromosome_15	11219539	G	T	BL6	5	NC_000081.7:13622379
chromosome_15	11525363	C	G	BL6	4	NC_000081.7:13927950
chromosome_15	15791356	C	A	BL6	4	NC_000081.7:18191990
chromosome_15	17446849	T	C	BL6	4	NC_000081.7:19846375
chromosome_15	23640321	G	C	BL6	3	NC_000081.7:26000731
chromosome_15	30809000	G	T	BL6	2	NC_000081.7:33166147
chromosome_15	39483394	T	C	BL6	5	NC_000081.7:41832881
chromosome_15	49492458	T	A	BL6	4	NC_000081.7:51833253
chromosome_15	49504866	A	C	BL6	3	NC_000081.7:51845661
chromosome_15	58964678	G	A	BL6	2	NC_000081.7:61295402
chromosome_15	59695226	C	T	BL6	2	NC_000081.7:62025266
chromosome_15	64702452	G	A	BL6	5	NC_000081.7:67024414
chromosome_15	65651085	G	C	BL6	3	NC_000081.7:67972449
chromosome_15	67412314	C	A	BL6	2	NC_000081.7:69733381
chromosome_15	68615497	C	T	BL6	3	NC_000081.7:70935891
chromosome_15	70428678	G	A	BL6	2	NC_000081.7:72744308
chromosome_15	77725204	C	T	BL6	4	NC_000081.7:80033404
chromosome_15	78593745	C	T	BL6	4	NC_000081.7:80901574
chromosome_15	83107952	G	C	BL6	4	NC_000081.7:85407666
chromosome_15	83198712	C	G	BL6	2	NC_000081.7:85498418
chromosome_15	95361471	G	C	BL6	3	NC_000081.7:97646976
chromosome_16	6733711	G	A	BL6	2	NC_000082.7:9408680
chromosome_16	10628243	C	T	BL6	5	NC_000082.7:13299465
chromosome_16	18590535	A	G	BL6	4	NC_000082.7:21255446
chromosome_16	21569674	C	T	BL6	5	NC_000082.7:24233483
chromosome_16	28520150	G	A	BL6	3	NC_000082.7:31180787
chromosome_16	34961775	C	T	BL6	2	NC_000082.7:37619587
chromosome_16	37627599	C	T	BL6	3	NC_000082.7:40284541
chromosome_16	38196367	T	C	BL6	4	NC_000082.7:40853286
chromosome_16	45404742	G	A	BL6	4	NC_000082.7:48055032
chromosome_16	50189656	G	A	BL6	2	NC_000082.7:52836128
chromosome_16	50627832	T	C	BL6	4	NC_000082.7:53274292
chromosome_16	58279846	T	A	BL6	5	NC_000082.7:60917065
chromosome_16	58463036	A	T	BL6	5	NC_000082.7:61100253
chromosome_16	65326586	G	A	BL6	3	NC_000082.7:67959366
chromosome_16	67931351	G	A	BL6	3	NC_000082.7:70562607
chromosome_16	68298551	C	T	BL6	2	NC_000082.7:70929687
chromosome_16	75934881	A	C	BL6	4	NC_000082.7:78561847
chromosome_16	76158687	G	T	BL6	5	NC_000082.7:78785571
chromosome_16	77169258	G	T	BL6	2	NC_000082.7:79795973
chromosome_16	79081984	T	C	BL6	4	NC_000082.7:81707607
chromosome_16	81390437	C	T	BL6	5	NC_000082.7:84015691
chromosome_16	83390027	C	T	BL6	4	NC_000082.7:86014013
chromosome_17	4799936	C	T	BL6	4	NC_000083.7:6353527
chromosome_17	4800662	G	A	BL6	5	NC_000083.7:6354253
chromosome_17	4874173	C	T	BL6	2
chromosome_17	5431824	A	C	BL6	3	NC_000083.7:7201345
chromosome_17	13114185	G	A	BL6	4	NC_000083.7:14427526
chromosome_17	16242107	C	A	BL6	5	NC_000083.7:17555635
chromosome_17	17708510	A	G	BL6	2	NC_000083.7:19021977
chromosome_17	18662717	A	G	BL6	4	NC_000083.7:19976073
chromosome_17	20587238	A	G	BL6	5	NC_000083.7:21897466
chromosome_17	20627193	T	A	BL6	5	NC_000083.7:21937420
chromosome_17	23194819	A	C	BL6	4	NC_000083.7:24504745
chromosome_17	24207807	C	T	BL6	3	NC_000083.7:25517399
chromosome_17	26995134	C	T	BL6	3	NC_000083.7:28302631
chromosome_17	34793099	C	T	BL6	5	NC_000083.7:36126400
chromosome_17	37077925	G	A	BL6	5	NC_000083.7:38410721
chromosome_17	37641024	G	T	BL6	5	NC_000083.7:38973794
chromosome_17	38234651	G	A	BL6	2	NC_000083.7:39567362
chromosome_17	38432859	C	A	BL6	5	NC_000083.7:39765557
chromosome_17	39343695	G	A	BL6	3	NC_000083.7:40676345
chromosome_17	55366844	A	G	BL6	5	NC_000083.7:56686861
chromosome_17	57486911	A	G	BL6	5	NC_000083.7:58805690
chromosome_17	58764861	T	A	BL6	4	NC_000083.7:60083050
chromosome_17	60146375	T	A	BL6	2	NC_000083.7:61464403
chromosome_17	62420722	G	T	BL6	2	NC_000083.7:63738224
chromosome_17	63723432	G	A	BL6	5	NC_000083.7:65039709
chromosome_17	75336227	G	A	BL6	5	NC_000083.7:76641549
chromosome_17	75836432	G	C	BL6	3	NC_000083.7:77141343
chromosome_17	80486658	C	A	BL6	2	NC_000083.7:81786790
chromosome_17	81304480	A	G	BL6	2	NC_000083.7:82604111
chromosome_17	82928983	T	C	BL6	4	NC_000083.7:84226723
chromosome_17	87997253	C	T	BL6	3	NC_000083.7:89283425
chromosome_17	92332819	G	A	BL6	2	NC_000083.7:93616859
chromosome_18	2521203	T	G	BL6	5	NC_000084.7:4914336
chromosome_18	4408803	G	T	BL6	4	NC_000084.7:6801611
chromosome_18	4977708	A	G	BL6	4	NC_000084.7:7370471
chromosome_18	5815330	G	A	BL6	4	NC_000084.7:8205401
chromosome_18	7068769	A	G	BL6	5	NC_000084.7:9458619
chromosome_18	7998440	A	T	BL6	5	NC_000084.7:10387986
chromosome_18	8796928	C	T	BL6	3	NC_000084.7:11186424
chromosome_18	11422039	C	T	BL6	3	NC_000084.7:13805660
chromosome_18	15653289	T	A	BL6	5	NC_000084.7:18035120
chromosome_18	21113934	G	A	BL6	3	NC_000084.7:23489838
chromosome_18	22837661	C	T	BL6	5	NC_000084.7:25212813
chromosome_18	27797173	A	C	BL6	4	NC_000084.7:30170470
chromosome_18	30810576	C	T	BL6	4	NC_000084.7:33182096
chromosome_18	34227635	C	T	BL6	5	NC_000084.7:36596296
chromosome_18	35779057	T	C	BL6	4	NC_000084.7:38147602
chromosome_18	37753214	G	A	BL6	3	NC_000084.7:40100013
chromosome_18	37878307	C	T	BL6	5	NC_000084.7:40225105
chromosome_18	39291531	G	A	BL6	2	NC_000084.7:41637512
chromosome_18	40650249	T	A	BL6	3	NC_000084.7:42995263
chromosome_18	41689041	C	A	BL6	2	NC_000084.7:44033478
chromosome_18	43863553	A	C	BL6	2	NC_000084.7:46207646
chromosome_18	44602700	C	T	BL6	3	NC_000084.7:46946585
chromosome_18	46309470	A	T	BL6	2	NC_000084.7:48652926
chromosome_18	48026677	C	A	BL6	2	NC_000084.7:50368705
chromosome_18	48547143	A	T	BL6	3	NC_000084.7:50885651
chromosome_18	48916278	T	C	BL6	3	NC_000084.7:51250895
chromosome_18	49309155	A	T	BL6	2	NC_000084.7:51643523
chromosome_18	49388052	T	G	BL6	2	NC_000084.7:51722374
chromosome_18	57572934	G	A	BL6	3	NC_000084.7:59904753
chromosome_18	58836232	C	T	BL6	4	NC_000084.7:61167642
chromosome_18	61352780	A	G	BL6	3	NC_000084.7:63678303
chromosome_18	63729551	G	A	BL6	2	NC_000084.7:66053160
chromosome_18	67556886	C	A	BL6	3	NC_000084.7:69877762
chromosome_18	72633728	A	C	BL6	2	NC_000084.7:74952037
chromosome_18	75418607	C	T	BL6	2	NC_000084.7:77734110
chromosome_18	78781895	C	A	BL6	4	NC_000084.7:81096512
chromosome_18	78903654	G	A	BL6	5	NC_000084.7:81218083
chromosome_18	85431705	C	A	BL6	3	NC_000084.7:87718138
chromosome_18	85508949	G	A	BL6	5	NC_000084.7:87795389
chromosome_18	86795607	G	C	BL6	3	NC_000084.7:89081276
chromosome_18	87531620	A	G	BL6	5	NC_000084.7:89817058
chromosome_19	11233162	C	A	BL6	2	NC_000085.7:13663585
chromosome_19	12706321	G	C	BL6	3	NC_000085.7:15136437
chromosome_19	14095529	C	T	BL6	3	NC_000085.7:16524065
chromosome_19	29316318	G	T	BL6	2	NC_000085.7:31727789
chromosome_19	30945537	A	C	BL6	5	NC_000085.7:33356808
chromosome_19	32689997	T	C	BL6	2	NC_000085.7:35076236
chromosome_19	37764295	C	T	BL6	4	NC_000085.7:40117025
chromosome_19	44363459	C	A	BL6	4	NC_000085.7:46707319
chromosome_19	47607018	G	C	BL6	3	NC_000085.7:49947140
chromosome_19	47750857	C	T	BL6	3	NC_000085.7:50091054
chromosome_19	50121365	A	C	BL6	2	NC_000085.7:52460044
chromosome_X	76479393	T	A	BL6	4	NC_000086.8:80675508
chromosome_X	81610444	G	A	BL6	2	NC_000086.8:85804482
chromosome_X	107429221	G	C	BL6	4	NC_000086.8:111468180
chromosome_X	117226165	G	A	BL6	2	NC_000086.8:121259337
chromosome_X	118758873	C	A	BL6	3	NC_000086.8:122818082
chromosome_X	162494412	C	T	BL6	3	NC_000086.8:168545278
chromosome_01	3424889	C	T	C3H	1	NC_000067.7:5765130
chromosome_01	5197666	C	T	C3H	3	NC_000067.7:7557638
chromosome_01	5354164	C	A	C3H	4	NC_000067.7:7716415
chromosome_01	6863822	T	G	C3H	4
chromosome_01	8581450	T	A	C3H	2	NC_000067.7:10953680
chromosome_01	8798404	A	G	C3H	1	NC_000067.7:11176125
chromosome_01	9476850	G	A	C3H	2	NC_000067.7:11858272
chromosome_01	13697156	C	T	C3H	4	NC_000067.7:16037595
chromosome_01	14685520	C	T	C3H	3	NC_000067.7:17031675
chromosome_01	18383419	T	C	C3H	3	NC_000067.7:20733972
chromosome_01	18383423	C	A	C3H	3	NC_000067.7:20733976
chromosome_01	20572555	G	T	C3H	3	NC_000067.7:22913291
chromosome_01	20802234	T	C	C3H	1	NC_000067.7:23142924
chromosome_01	23792125	C	A	C3H	2	NC_000067.7:26139348
chromosome_01	23999302	G	A	C3H	1	NC_000067.7:26347380
chromosome_01	24966895	C	A	C3H	2	NC_000067.7:27297885
chromosome_01	25402394	C	A	C3H	4	NC_000067.7:27712965
chromosome_01	25487447	G	T	C3H	4	NC_000067.7:27792680
chromosome_01	26239712	A	T	C3H	1	NC_000067.7:28550323
chromosome_01	26832851	T	A	C3H	3	NC_000067.7:29117358
chromosome_01	26836982	G	A	C3H	1	NC_000067.7:29121414
chromosome_01	29361208	C	A	C3H	1	NC_000067.7:31657636
chromosome_01	35964853	G	T	C3H	2	NC_000067.7:38234566
chromosome_01	36464216	C	A	C3H	4	NC_000067.7:38726597
chromosome_01	37451232	C	T	C3H	2	NC_000067.7:39696354
chromosome_01	37940244	G	A	C3H	1	NC_000067.7:40181651
chromosome_01	38402027	T	C	C3H	3	NC_000067.7:40639917
chromosome_01	39264073	G	A	C3H	4	NC_000067.7:41497012
chromosome_01	41996231	C	A	C3H	3	NC_000067.7:44171559
chromosome_01	47446257	T	G	C3H	2	NC_000067.7:49596990
chromosome_01	49322882	A	T	C3H	4	NC_000067.7:51477603
chromosome_01	59971352	C	A	C3H	4	NC_000067.7:62116111
chromosome_01	60294091	A	G	C3H	4
chromosome_01	62144074	C	G	C3H	3	NC_000067.7:64299784
chromosome_01	65688542	C	T	C3H	4	NC_000067.7:67783865
chromosome_01	66812068	G	C	C3H	1	NC_000067.7:68904774
chromosome_01	75917926	C	A	C3H	1	NC_000067.7:78004400
chromosome_01	77638995	T	C	C3H	2	NC_000067.7:79730724
chromosome_01	81186592	C	T	C3H	2	NC_000067.7:83285496
chromosome_01	82259001	G	A	C3H	2	NC_000067.7:84357359
chromosome_01	83277436	C	T	C3H	4
chromosome_01	83531710	G	A	C3H	2
chromosome_01	83889968	G	T	C3H	2
chromosome_01	84378621	C	G	C3H	2
chromosome_01	86038953	A	T	C3H	3
chromosome_01	88092507	T	C	C3H	4	NC_000067.7:87879862
chromosome_01	88097018	G	C	C3H	4	NC_000067.7:87884372
chromosome_01	88770848	T	G	C3H	3	NC_000067.7:88558038
chromosome_01	90904601	T	G	C3H	2	NC_000067.7:90683121
chromosome_01	96408180	C	A	C3H	2	NC_000067.7:96260777
chromosome_01	96452909	T	C	C3H	1	NC_000067.7:96305495
chromosome_01	97676804	C	T	C3H	2	NC_000067.7:97528450
chromosome_01	98455083	T	G	C3H	1	NC_000067.7:98306727
chromosome_01	98793117	C	A	C3H	3	NC_000067.7:98644748
chromosome_01	99472737	C	T	C3H	2	NC_000067.7:99323728
chromosome_01	102481581	T	G	C3H	4	NC_000067.7:102337296
chromosome_01	103201992	G	A	C3H	2	NC_000067.7:103057738
chromosome_01	103620334	G	A	C3H	4	NC_000067.7:103483440
chromosome_01	104275195	T	C	C3H	1	NC_000067.7:104106161
chromosome_01	104639859	C	T	C3H	4	NC_000067.7:104476033
chromosome_01	105555807	A	T	C3H	1	NC_000067.7:105359969
chromosome_01	106972797	C	A	C3H	3	NC_000067.7:106760112
chromosome_01	107064156	C	T	C3H	4	NC_000067.7:106851495
chromosome_01	107688026	G	A	C3H	1	NC_000067.7:107475026
chromosome_01	107744092	G	T	C3H	1	NC_000067.7:107523772
chromosome_01	109413140	A	C	C3H	4	NC_000067.7:109194476
chromosome_01	111228118	G	A	C3H	3	NC_000067.7:111037525
chromosome_01	114165245	G	C	C3H	2	NC_000067.7:113937822
chromosome_01	117901002	G	T	C3H	2	NC_000067.7:117762999
chromosome_01	120603838	A	T	C3H	3	NC_000067.7:120446253
chromosome_01	120999626	C	G	C3H	1	NC_000067.7:120844913
chromosome_01	122234457	T	G	C3H	2	NC_000067.7:122087337
chromosome_01	122404008	A	G	C3H	4	NC_000067.7:122247396
chromosome_01	122694506	A	C	C3H	1	NC_000067.7:122538178
chromosome_01	125493658	G	A	C3H	2	NC_000067.7:125369214
chromosome_01	126784615	C	T	C3H	4	NC_000067.7:126655358
chromosome_01	128173580	T	C	C3H	4	NC_000067.7:128059639
chromosome_01	129922284	C	T	C3H	1	NC_000067.7:129809271
chromosome_01	134787583	T	C	C3H	1
chromosome_01	135288546	T	A	C3H	3	NC_000067.7:135149494
chromosome_01	138052760	G	T	C3H	2	NC_000067.7:137906333
chromosome_01	141047926	C	A	C3H	1	NC_000067.7:140871294
chromosome_01	148276773	C	A	C3H	2	NC_000067.7:148095117
chromosome_01	150383117	T	A	C3H	3	NC_000067.7:150181828
chromosome_01	151292702	C	A	C3H	2	NC_000067.7:151076425
chromosome_01	153322465	C	T	C3H	4	NC_000067.7:153089809
chromosome_01	155274946	A	G	C3H	2	NC_000067.7:155038161
chromosome_01	157549386	C	A	C3H	1	NC_000067.7:157315929
chromosome_01	157758171	A	G	C3H	4	NC_000067.7:157518252
chromosome_01	158188018	A	C	C3H	2	NC_000067.7:157948098
chromosome_01	159920021	A	G	C3H	1	NC_000067.7:159671109
chromosome_01	162510136	G	T	C3H	4	NC_000067.7:162242917
chromosome_01	163023213	G	A	C3H	2	NC_000067.7:162762710
chromosome_01	168559430	T	G	C3H	1	NC_000067.7:168291117
chromosome_01	170194377	G	A	C3H	3	NC_000067.7:169954185
chromosome_01	170761031	A	T	C3H	3
chromosome_01	170761193	T	G	C3H	3
chromosome_01	171841004	C	T	C3H	3
chromosome_01	172343391	C	T	C3H	4	NC_000067.7:171574291
chromosome_01	173949556	G	A	C3H	1	NC_000067.7:173163885
chromosome_01	174712006	G	A	C3H	1	NC_000067.7:173843888
chromosome_01	175134323	G	A	C3H	4	NC_000067.7:174302794
chromosome_01	175577816	A	T	C3H	2	NC_000067.7:174727957
chromosome_01	177548304	C	G	C3H	4	NC_000067.7:176698786
chromosome_01	178800469	G	T	C3H	2	NC_000067.7:177955625
chromosome_01	178842085	A	G	C3H	1	NC_000067.7:177997239
chromosome_01	179186384	T	C	C3H	3	NC_000067.7:178341483
chromosome_01	182484665	T	A	C3H	2	NC_000067.7:181630912
chromosome_01	183095306	G	A	C3H	2	NC_000067.7:182241520
chromosome_01	184940582	G	A	C3H	2	NC_000067.7:184064111
chromosome_01	185497213	G	A	C3H	1	NC_000067.7:184618954
chromosome_01	187442289	C	T	C3H	4	NC_000067.7:186567830
chromosome_01	187779877	G	T	C3H	3	NC_000067.7:186917627
chromosome_01	188336425	C	A	C3H	4	NC_000067.7:187477049
chromosome_01	188510414	G	C	C3H	3	NC_000067.7:187651064
chromosome_01	189733527	G	A	C3H	2	NC_000067.7:188882225
chromosome_01	190864699	A	C	C3H	1	NC_000067.7:189999538
chromosome_01	194323022	A	G	C3H	3	NC_000067.7:193455368
chromosome_01	194323027	C	A	C3H	3	NC_000067.7:193455373
chromosome_02	4626445	G	A	C3H	2	NC_000068.8:7670018
chromosome_02	5356059	C	A	C3H	1	NC_000068.8:8398929
chromosome_02	6579528	T	C	C3H	3	NC_000068.8:9621677
chromosome_02	7370735	T	G	C3H	3	NC_000068.8:10407229
chromosome_02	7678363	C	T	C3H	1	NC_000068.8:10714426
chromosome_02	13041779	T	G	C3H	4	NC_000068.8:16072462
chromosome_02	20152919	C	T	C3H	3	NC_000068.8:23179004
chromosome_02	23087264	G	A	C3H	3	NC_000068.8:26101736
chromosome_02	24400434	C	T	C3H	3	NC_000068.8:27419365
chromosome_02	26553466	A	T	C3H	1	NC_000068.8:29571238
chromosome_02	27162975	C	T	C3H	3	NC_000068.8:30180044
chromosome_02	29104113	C	T	C3H	3	NC_000068.8:32119686
chromosome_02	29370692	T	C	C3H	3	NC_000068.8:32385987
chromosome_02	32172307	G	A	C3H	2	NC_000068.8:35180232
chromosome_02	33827429	T	A	C3H	3	NC_000068.8:36820770
chromosome_02	35485689	A	C	C3H	1	NC_000068.8:38485826
chromosome_02	39318727	C	A	C3H	1	NC_000068.8:42335997
chromosome_02	39443601	T	G	C3H	4	NC_000068.8:42468888
chromosome_02	39455947	G	A	C3H	3	NC_000068.8:42481145
chromosome_02	44232435	T	A	C3H	3	NC_000068.8:47236010
chromosome_02	49789091	G	C	C3H	2	NC_000068.8:52742956
chromosome_02	50123199	G	T	C3H	3	NC_000068.8:53077219
chromosome_02	51229319	T	A	C3H	2	NC_000068.8:54142816
chromosome_02	53217832	C	A	C3H	3	NC_000068.8:56142529
chromosome_02	56841791	C	G	C3H	3	NC_000068.8:59759824
chromosome_02	56899254	G	A	C3H	3	NC_000068.8:59817278
chromosome_02	59553760	A	T	C3H	3	NC_000068.8:62469374
chromosome_02	60643543	G	A	C3H	1	NC_000068.8:63549118
chromosome_02	61073583	G	T	C3H	3	NC_000068.8:63978814
chromosome_02	61129206	G	C	C3H	2	NC_000068.8:64034289
chromosome_02	62969188	A	C	C3H	4	NC_000068.8:65848310
chromosome_02	63871289	G	C	C3H	2	NC_000068.8:66757831
chromosome_02	64518051	A	C	C3H	3	NC_000068.8:67388742
chromosome_02	65750432	C	A	C3H	2	NC_000068.8:68577780
chromosome_02	65765989	G	C	C3H	4	NC_000068.8:68593009
chromosome_02	66910632	C	G	C3H	4	NC_000068.8:69734417
chromosome_02	71616244	C	A	C3H	1	NC_000068.8:74439701
chromosome_02	74732348	T	C	C3H	3	NC_000068.8:77560465
chromosome_02	74869639	G	T	C3H	3	NC_000068.8:77697759
chromosome_02	74869641	G	T	C3H	3	NC_000068.8:77697761
chromosome_02	76030775	C	A	C3H	2	NC_000068.8:78858302
chromosome_02	80709163	T	G	C3H	1	NC_000068.8:83545482
chromosome_02	83417166	G	A	C3H	3	NC_000068.8:86354008
chromosome_02	84139728	C	A	C3H	2	NC_000068.8:87052711
chromosome_02	84714881	C	T	C3H	1	NC_000068.8:87579879
chromosome_02	85163751	T	C	C3H	3	NC_000068.8:88013605
chromosome_02	85243621	A	G	C3H	3	NC_000068.8:88093238
chromosome_02	86244380	G	C	C3H	1	NC_000068.8:89082870
chromosome_02	88254292	A	G	C3H	4	NC_000068.8:91184822
chromosome_02	89839062	T	C	C3H	2	NC_000068.8:92766655
chromosome_02	90346751	G	A	C3H	1	NC_000068.8:93275001
chromosome_02	90775202	G	A	C3H	4	NC_000068.8:93708690
chromosome_02	94097268	A	G	C3H	2	NC_000068.8:97003553
chromosome_02	94149553	C	A	C3H	4	NC_000068.8:97060852
chromosome_02	97711782	T	C	C3H	4	NC_000068.8:100805705
chromosome_02	97871880	C	G	C3H	1	NC_000068.8:100960097
chromosome_02	103793185	A	G	C3H	3	NC_000068.8:106823360
chromosome_02	106685296	T	C	C3H	1
chromosome_02	110259428	T	G	C3H	1	NC_000068.8:113225799
chromosome_02	110406302	T	A	C3H	1	NC_000068.8:113378526
chromosome_02	116280375	G	C	C3H	4	NC_000068.8:119188066
chromosome_02	118919164	G	A	C3H	2	NC_000068.8:121835331
chromosome_02	119158927	G	A	C3H	3	NC_000068.8:122070744
chromosome_02	119317467	C	A	C3H	1	NC_000068.8:122228537
chromosome_02	120347288	C	A	C3H	2	NC_000068.8:123176606
chromosome_02	120594517	A	G	C3H	4	NC_000068.8:123423879
chromosome_02	121917871	C	T	C3H	4	NC_000068.8:124734301
chromosome_02	122458379	G	A	C3H	3	NC_000068.8:125268220
chromosome_02	126386757	C	T	C3H	1	NC_000068.8:129132135
chromosome_02	126609263	T	G	C3H	3	NC_000068.8:129354523
chromosome_02	127730680	T	C	C3H	1	NC_000068.8:130468101
chromosome_02	129395325	G	A	C3H	4	NC_000068.8:132139076
chromosome_02	131799415	A	T	C3H	2	NC_000068.8:134513322
chromosome_02	132961334	G	C	C3H	2	NC_000068.8:135675122
chromosome_02	133469507	G	A	C3H	1	NC_000068.8:136176927
chromosome_02	134029669	A	G	C3H	4	NC_000068.8:136736783
chromosome_02	134911919	G	A	C3H	3	NC_000068.8:137618296
chromosome_02	136664642	A	G	C3H	1	NC_000068.8:139370802
chromosome_02	137342979	T	C	C3H	4	NC_000068.8:140048740
chromosome_02	139290656	T	C	C3H	1	NC_000068.8:141994789
chromosome_02	142269628	C	T	C3H	1	NC_000068.8:144971792
chromosome_02	142794162	A	T	C3H	2	NC_000068.8:145496282
chromosome_02	146303990	G	T	C3H	3	NC_000068.8:149006491
chromosome_02	147571559	G	A	C3H	3	NC_000068.8:150277740
chromosome_02	148317506	T	G	C3H	2	NC_000068.8:151023227
chromosome_02	148419838	T	A	C3H	1	NC_000068.8:151125559
chromosome_02	151874613	T	C	C3H	3	NC_000068.8:154553512
chromosome_02	151874615	T	C	C3H	3	NC_000068.8:154553514
chromosome_02	151874624	T	C	C3H	3	NC_000068.8:154553523
chromosome_02	151913382	G	A	C3H	1	NC_000068.8:154592439
chromosome_02	158903565	T	C	C3H	1	NC_000068.8:161584431
chromosome_02	159392120	T	A	C3H	1	NC_000068.8:162078413
chromosome_02	161695261	C	T	C3H	4	NC_000068.8:164398877
chromosome_02	164376094	C	T	C3H	3	NC_000068.8:167074623
chromosome_02	164415158	A	G	C3H	1	NC_000068.8:167112892
chromosome_02	167808752	G	A	C3H	2	NC_000068.8:170487169
chromosome_02	169678018	A	T	C3H	1	NC_000068.8:172358212
chromosome_02	171734551	A	G	C3H	3	NC_000068.8:174411752
chromosome_02	173291347	C	A	C3H	1	NC_000068.8:177018671
chromosome_02	174612539	A	T	C3H	3	NC_000068.8:178291178
chromosome_02	176012362	A	G	C3H	3	NC_000068.8:179692236
chromosome_03	5193951	G	T	C3H	3	NC_000069.7:4874527
chromosome_03	5757360	A	C	C3H	4	NC_000069.7:5444605
chromosome_03	6988281	G	C	C3H	3	NC_000069.7:6689152
chromosome_03	9830335	T	C	C3H	3	NC_000069.7:9523732
chromosome_03	10861620	A	C	C3H	2	NC_000069.7:10545520
chromosome_03	13193228	C	A	C3H	2	NC_000069.7:12875831
chromosome_03	14667699	C	A	C3H	1	NC_000069.7:14349263
chromosome_03	15767095	G	A	C3H	1
chromosome_03	16148147	G	A	C3H	1	NC_000069.7:16058249
chromosome_03	17702722	G	T	C3H	1
chromosome_03	18015933	G	A	C3H	3	NC_000069.7:17910301
chromosome_03	20609396	A	G	C3H	4	NC_000069.7:20483262
chromosome_03	22805785	G	A	C3H	2	NC_000069.7:22680770
chromosome_03	23762003	C	A	C3H	2	NC_000069.7:23636949
chromosome_03	23793892	A	T	C3H	3	NC_000069.7:23668834
chromosome_03	24091768	G	A	C3H	2	NC_000069.7:23966689
chromosome_03	24931802	C	T	C3H	1	NC_000069.7:24806717
chromosome_03	26666523	T	G	C3H	4
chromosome_03	26710744	G	T	C3H	3	NC_000069.7:26590477
chromosome_03	26980651	C	T	C3H	2	NC_000069.7:26859785
chromosome_03	28196200	C	T	C3H	4	NC_000069.7:28070168
chromosome_03	31013838	C	T	C3H	4	NC_000069.7:30922492
chromosome_03	31292717	G	T	C3H	4	NC_000069.7:31198622
chromosome_03	32352907	C	T	C3H	1	NC_000069.7:32255124
chromosome_03	32568036	C	A	C3H	2
chromosome_03	32665215	T	C	C3H	2	NC_000069.7:32563249
chromosome_03	33595582	A	T	C3H	2	NC_000069.7:33502554
chromosome_03	38656912	A	G	C3H	2	NC_000069.7:38563601
chromosome_03	42559860	A	G	C3H	1	NC_000069.7:42499936
chromosome_03	45539464	G	A	C3H	3	NC_000069.7:45466180
chromosome_03	46129680	G	T	C3H	2	NC_000069.7:46053430
chromosome_03	47237117	G	A	C3H	1	NC_000069.7:47167819
chromosome_03	49850220	C	A	C3H	3	NC_000069.7:49799076
chromosome_03	50597847	G	A	C3H	3	NC_000069.7:50538740
chromosome_03	53908926	T	C	C3H	3	NC_000069.7:53845463
chromosome_03	54959616	A	C	C3H	3	NC_000069.7:54894011
chromosome_03	55297632	A	C	C3H	1	NC_000069.7:55231675
chromosome_03	57543972	C	A	C3H	1	NC_000069.7:57479586
chromosome_03	61487745	T	G	C3H	3	NC_000069.7:61363713
chromosome_03	62473297	G	A	C3H	4	NC_000069.7:62380454
chromosome_03	64778273	T	G	C3H	1	NC_000069.7:64680580
chromosome_03	67065995	A	C	C3H	2	NC_000069.7:66967743
chromosome_03	67688636	A	G	C3H	1	NC_000069.7:67590263
chromosome_03	68562111	A	C	C3H	3	NC_000069.7:68445840
chromosome_03	69887418	T	A	C3H	1	NC_000069.7:69792227
chromosome_03	71262828	C	T	C3H	2	NC_000069.7:71165173
chromosome_03	71848793	C	T	C3H	2	NC_000069.7:71745598
chromosome_03	75574756	T	C	C3H	4	NC_000069.7:75455185
chromosome_03	75765957	C	T	C3H	2	NC_000069.7:75646419
chromosome_03	78124556	T	G	C3H	3	NC_000069.7:78002785
chromosome_03	78848098	C	G	C3H	2	NC_000069.7:78743064
chromosome_03	78958726	G	A	C3H	1	NC_000069.7:78847532
chromosome_03	79843075	T	G	C3H	4	NC_000069.7:79746519
chromosome_03	80907243	A	T	C3H	4	NC_000069.7:80810873
chromosome_03	84688231	C	T	C3H	3	NC_000069.7:84572003
chromosome_03	86776074	T	G	C3H	2	NC_000069.7:86672263
chromosome_03	87838402	G	A	C3H	1	NC_000069.7:87709797
chromosome_03	88275778	C	T	C3H	1	NC_000069.7:88148556
chromosome_03	91101373	G	A	C3H	3	NC_000069.7:90979866
chromosome_03	91758450	A	G	C3H	2	NC_000069.7:91636751
chromosome_03	92784246	C	T	C3H	2	NC_000069.7:92630684
chromosome_03	94643231	A	G	C3H	4	NC_000069.7:94055679
chromosome_03	94712605	G	A	C3H	3	NC_000069.7:94122138
chromosome_03	95541160	T	G	C3H	1	NC_000069.7:94958359
chromosome_03	97838999	T	G	C3H	2	NC_000069.7:97202006
chromosome_03	98446219	C	T	C3H	1	NC_000069.7:97808636
chromosome_03	99717495	C	T	C3H	3	NC_000069.7:99132015
chromosome_03	100760439	C	T	C3H	3	NC_000069.7:100158357
chromosome_03	106121354	A	G	C3H	3	NC_000069.7:105503069
chromosome_03	107758376	T	G	C3H	2	NC_000069.7:107118664
chromosome_03	108624319	C	T	C3H	3	NC_000069.7:107983802
chromosome_03	109490095	C	T	C3H	3	NC_000069.7:108847868
chromosome_03	112886495	T	A	C3H	2	NC_000069.7:112254666
chromosome_03	113946104	A	C	C3H	2	NC_000069.7:113317182
chromosome_03	114594063	G	A	C3H	1	NC_000069.7:113964326
chromosome_03	114938649	G	A	C3H	3
chromosome_03	114948228	C	T	C3H	4	NC_000069.7:114320771
chromosome_03	117469508	A	G	C3H	3	NC_000069.7:116851944
chromosome_03	117857892	A	T	C3H	4	NC_000069.7:117251136
chromosome_03	118142498	T	G	C3H	2	NC_000069.7:117522072
chromosome_03	118869296	T	G	C3H	3	NC_000069.7:118251633
chromosome_03	120996131	T	G	C3H	2	NC_000069.7:120372098
chromosome_03	121690721	C	G	C3H	2	NC_000069.7:121099241
chromosome_03	122458396	T	G	C3H	3	NC_000069.7:121865927
chromosome_03	123052917	C	A	C3H	4	NC_000069.7:122455957
chromosome_03	129333196	A	G	C3H	3	NC_000069.7:128759004
chromosome_03	130643630	G	C	C3H	2	NC_000069.7:130057149
chromosome_03	130676713	C	T	C3H	3	NC_000069.7:130090242
chromosome_03	133152965	C	A	C3H	2	NC_000069.7:132571130
chromosome_03	136786809	T	A	C3H	2	NC_000069.7:136202616
chromosome_03	138140710	G	T	C3H	1
chromosome_03	142356839	C	A	C3H	2	NC_000069.7:141772537
chromosome_03	145153957	C	T	C3H	1	NC_000069.7:144514101
chromosome_03	150410572	G	A	C3H	1	NC_000069.7:149733472
chromosome_03	150411589	T	G	C3H	4	NC_000069.7:149734495
chromosome_03	151208370	A	T	C3H	2	NC_000069.7:150514942
chromosome_03	156528951	G	A	C3H	3	NC_000069.7:155807208
chromosome_04	5262351	T	C	C3H	2	NC_000070.7:3758558
chromosome_04	5837129	T	C	C3H	1	NC_000070.7:4335572
chromosome_04	9781917	A	T	C3H	3	NC_000070.7:8283331
chromosome_04	11305427	G	A	C3H	1	NC_000070.7:9837116
chromosome_04	11981867	C	T	C3H	4	NC_000070.7:10519297
chromosome_04	12513932	C	T	C3H	3	NC_000070.7:11052161
chromosome_04	12705080	G	C	C3H	2	NC_000070.7:11244941
chromosome_04	15798762	T	G	C3H	1	NC_000070.7:14346069
chromosome_04	16081506	G	T	C3H	3	NC_000070.7:14628194
chromosome_04	19335041	C	A	C3H	1	NC_000070.7:17887563
chromosome_04	20435286	A	G	C3H	4	NC_000070.7:18998328
chromosome_04	22261079	T	G	C3H	4	NC_000070.7:20818675
chromosome_04	25760439	C	G	C3H	4	NC_000070.7:24287796
chromosome_04	27274250	C	T	C3H	2	NC_000070.7:25794457
chromosome_04	28829034	C	T	C3H	4	NC_000070.7:27348087
chromosome_04	28975859	A	G	C3H	4	NC_000070.7:27494892
chromosome_04	29746328	C	T	C3H	2	NC_000070.7:28265297
chromosome_04	31161198	G	T	C3H	3	NC_000070.7:29672873
chromosome_04	32502647	A	G	C3H	1	NC_000070.7:31023013
chromosome_04	33409013	A	C	C3H	3	NC_000070.7:31922419
chromosome_04	35926061	G	A	C3H	4	NC_000070.7:34459110
chromosome_04	37251149	T	C	C3H	2	NC_000070.7:35801584
chromosome_04	37729921	C	T	C3H	1	NC_000070.7:36280460
chromosome_04	38673074	G	A	C3H	4	NC_000070.7:37222749
chromosome_04	38729178	C	T	C3H	4	NC_000070.7:37278851
chromosome_04	39053627	C	G	C3H	3	NC_000070.7:37603303
chromosome_04	39821014	C	T	C3H	2	NC_000070.7:38348190
chromosome_04	40896228	C	A	C3H	4	NC_000070.7:39394739
chromosome_04	44573598	C	T	C3H	4	NC_000070.7:43792974
chromosome_04	45025829	T	C	C3H	1	NC_000070.7:44244659
chromosome_04	45871609	C	T	C3H	4	NC_000070.7:45087651
chromosome_04	52417641	T	C	C3H	4	NC_000070.7:51663059
chromosome_04	55327226	G	C	C3H	3	NC_000070.7:54580933
chromosome_04	55426824	G	A	C3H	4
chromosome_04	65839748	C	T	C3H	4	NC_000070.7:65933536
chromosome_04	66200747	T	G	C3H	3	NC_000070.7:66294242
chromosome_04	67779285	T	C	C3H	3	NC_000070.7:67872172
chromosome_04	68617906	G	A	C3H	1	NC_000070.7:68710674
chromosome_04	68976665	G	T	C3H	4	NC_000070.7:69069372
chromosome_04	69628701	G	A	C3H	2	NC_000070.7:69721332
chromosome_04	69628794	A	G	C3H	2	NC_000070.7:69721425
chromosome_04	72233229	G	T	C3H	2	NC_000070.7:72325402
chromosome_04	77635935	C	A	C3H	4	NC_000070.7:77733806
chromosome_04	79164258	T	G	C3H	4	NC_000070.7:79267080
chromosome_04	79531688	G	C	C3H	1	NC_000070.7:79634462
chromosome_04	79709392	G	C	C3H	1	NC_000070.7:79812212
chromosome_04	81549150	T	G	C3H	1	NC_000070.7:81650624
chromosome_04	82792687	C	G	C3H	4	NC_000070.7:82893519
chromosome_04	85370255	G	T	C3H	4	NC_000070.7:85468740
chromosome_04	86811799	T	A	C3H	3	NC_000070.7:86892968
chromosome_04	87029540	C	T	C3H	3	NC_000070.7:87092894
chromosome_04	90576023	T	G	C3H	4	NC_000070.7:90606365
chromosome_04	91205791	C	T	C3H	2	NC_000070.7:91221591
chromosome_04	91603350	T	G	C3H	3	NC_000070.7:91631835
chromosome_04	96376692	C	T	C3H	3	NC_000070.7:96457757
chromosome_04	96759631	G	A	C3H	4	NC_000070.7:96840665
chromosome_04	97253692	C	A	C3H	4	NC_000070.7:97334728
chromosome_04	98847220	A	T	C3H	1	NC_000070.7:98913954
chromosome_04	99903425	A	T	C3H	3	NC_000070.7:99960148
chromosome_04	102627119	C	G	C3H	3	NC_000070.7:102645398
chromosome_04	102690413	G	T	C3H	1	NC_000070.7:102708701
chromosome_04	102994236	A	T	C3H	4	NC_000070.7:103012465
chromosome_04	103300811	G	A	C3H	2	NC_000070.7:103325129
chromosome_04	107316583	C	T	C3H	2
chromosome_04	109166585	G	A	C3H	1	NC_000070.7:109201342
chromosome_04	109882298	T	A	C3H	3	NC_000070.7:109919455
chromosome_04	109882300	G	A	C3H	3	NC_000070.7:109919457
chromosome_04	111012449	T	C	C3H	4	NC_000070.7:111055721
chromosome_04	111187918	T	A	C3H	1	NC_000070.7:111233956
chromosome_04	111909012	A	C	C3H	1
chromosome_04	112815358	C	T	C3H	4	NC_000070.7:114078775
chromosome_04	113466937	C	A	C3H	3	NC_000070.7:114716137
chromosome_04	114874443	G	A	C3H	2	NC_000070.7:116106757
chromosome_04	115043896	G	A	C3H	3	NC_000070.7:116275418
chromosome_04	115163743	A	C	C3H	3	NC_000070.7:116394846
chromosome_04	118382263	A	T	C3H	2
chromosome_04	118390344	T	C	C3H	4	NC_000070.7:119614948
chromosome_04	118955800	T	C	C3H	4	NC_000070.7:120183083
chromosome_04	123932172	G	T	C3H	2	NC_000070.7:125951645
chromosome_04	124832098	A	G	C3H	4	NC_000070.7:126845633
chromosome_04	124845710	A	T	C3H	4	NC_000070.7:126859264
chromosome_04	127815714	G	T	C3H	4
chromosome_04	130207093	C	T	C3H	3	NC_000070.7:132223462
chromosome_04	133157675	C	T	C3H	2	NC_000070.7:135167719
chromosome_04	133951698	G	A	C3H	3	NC_000070.7:135968984
chromosome_04	135236562	C	A	C3H	4
chromosome_04	136256875	T	G	C3H	2	NC_000070.7:138281566
chromosome_04	137564452	A	C	C3H	4	NC_000070.7:139574868
chromosome_04	138203601	A	G	C3H	4	NC_000070.7:140217272
chromosome_04	139755823	A	G	C3H	4	NC_000070.7:141762429
chromosome_04	148444391	C	A	C3H	4	NC_000070.7:150261061
chromosome_04	148589407	T	A	C3H	2	NC_000070.7:150406623
chromosome_04	149771034	G	A	C3H	3	NC_000070.7:151587750
chromosome_04	150670157	G	A	C3H	4	NC_000070.7:152484963
chromosome_04	152322870	G	T	C3H	4
chromosome_04	152401904	T	A	C3H	3	NC_000070.7:154200168
chromosome_04	154199094	G	A	C3H	3
chromosome_04	154199096	G	A	C3H	3
chromosome_04	154199101	G	A	C3H	3
chromosome_05	4297955	C	G	C3H	1	NC_000071.7:3941756
chromosome_05	6768153	A	G	C3H	2	NC_000071.7:6380337
chromosome_05	7664328	G	C	C3H	3
chromosome_05	7772139	A	G	C3H	2	NC_000071.7:7377949
chromosome_05	7954063	C	A	C3H	4	NC_000071.7:7559867
chromosome_05	7982084	T	A	C3H	2	NC_000071.7:7587882
chromosome_05	9085855	A	C	C3H	1	NC_000071.7:8691234
chromosome_05	10856604	A	T	C3H	2	NC_000071.7:10461631
chromosome_05	10948340	C	T	C3H	1	NC_000071.7:10553370
chromosome_05	12343407	T	G	C3H	2	NC_000071.7:11947878
chromosome_05	13845882	A	T	C3H	2	NC_000071.7:13449164
chromosome_05	15967470	T	C	C3H	2
chromosome_05	16135488	A	T	C3H	4
chromosome_05	20298930	G	A	C3H	2	NC_000071.7:17261667
chromosome_05	20370254	T	C	C3H	1	NC_000071.7:17332992
chromosome_05	21151737	A	T	C3H	1	NC_000071.7:18108024
chromosome_05	21484569	A	G	C3H	2	NC_000071.7:18440768
chromosome_05	23613262	C	A	C3H	4	NC_000071.7:20568537
chromosome_05	26715767	A	G	C3H	1	NC_000071.7:23659758
chromosome_05	26880287	C	T	C3H	2	NC_000071.7:23824115
chromosome_05	30044888	C	T	C3H	3	NC_000071.7:26893168
chromosome_05	34070613	C	G	C3H	2	NC_000071.7:30925525
chromosome_05	36763044	C	G	C3H	1	NC_000071.7:33625959
chromosome_05	38930377	G	C	C3H	2	NC_000071.7:35792518
chromosome_05	38933267	T	G	C3H	2	NC_000071.7:35795414
chromosome_05	40471328	C	T	C3H	1	NC_000071.7:37364809
chromosome_05	41000024	G	T	C3H	2	NC_000071.7:37899912
chromosome_05	42617925	T	A	C3H	1	NC_000071.7:39520468
chromosome_05	45230424	C	T	C3H	1	NC_000071.7:42133977
chromosome_05	46610068	G	A	C3H	1	NC_000071.7:43614550
chromosome_05	46922584	T	A	C3H	1	NC_000071.7:43926778
chromosome_05	49706924	G	T	C3H	4	NC_000071.7:46715383
chromosome_05	50676490	C	T	C3H	3	NC_000071.7:47698218
chromosome_05	54012384	A	T	C3H	3	NC_000071.7:51014102
chromosome_05	57308967	G	C	C3H	1	NC_000071.7:54284585
chromosome_05	58906489	A	G	C3H	2	NC_000071.7:55886714
chromosome_05	60123330	C	T	C3H	4	NC_000071.7:57087433
chromosome_05	60435088	G	A	C3H	2	NC_000071.7:57398976
chromosome_05	62215943	C	T	C3H	1	NC_000071.7:59206875
chromosome_05	62855539	C	G	C3H	4	NC_000071.7:59854774
chromosome_05	63359793	A	C	C3H	4	NC_000071.7:60360171
chromosome_05	64371887	G	T	C3H	3	NC_000071.7:61363249
chromosome_05	65603602	C	A	C3H	2	NC_000071.7:62584022
chromosome_05	65654128	G	C	C3H	2	NC_000071.7:62634516
chromosome_05	66160882	G	A	C3H	3	NC_000071.7:63140514
chromosome_05	66206593	A	G	C3H	2	NC_000071.7:63186410
chromosome_05	67484183	C	T	C3H	2	NC_000071.7:64449313
chromosome_05	74684441	T	G	C3H	1	NC_000071.7:71641786
chromosome_05	83021493	C	T	C3H	2	NC_000071.7:79957190
chromosome_05	83865131	A	G	C3H	1	NC_000071.7:80807063
chromosome_05	87200849	G	A	C3H	2	NC_000071.7:84171790
chromosome_05	87750436	C	A	C3H	4	NC_000071.7:84722724
chromosome_05	88253250	A	G	C3H	2	NC_000071.7:85223493
chromosome_05	90588461	C	T	C3H	1	NC_000071.7:87568022
chromosome_05	91439828	A	G	C3H	4
chromosome_05	91577357	C	T	C3H	3	NC_000071.7:88563588
chromosome_05	94041511	C	T	C3H	4	NC_000071.7:91000987
chromosome_05	95190357	C	T	C3H	1	NC_000071.7:92156608
chromosome_05	98813927	G	T	C3H	3	NC_000071.7:96129082
chromosome_05	100779124	G	A	C3H	4	NC_000071.7:98080112
chromosome_05	102229662	C	T	C3H	1	NC_000071.7:99543408
chromosome_05	102576804	G	T	C3H	4	NC_000071.7:99889021
chromosome_05	104399313	G	T	C3H	3	NC_000071.7:101686634
chromosome_05	113244789	C	T	C3H	4	NC_000071.7:110715555
chromosome_05	113905667	A	C	C3H	3	NC_000071.7:111382376
chromosome_05	116125906	A	C	C3H	4	NC_000071.7:113614850
chromosome_05	117036308	A	C	C3H	3	NC_000071.7:114515314
chromosome_05	120466059	G	A	C3H	2	NC_000071.7:117944214
chromosome_05	121227414	T	A	C3H	3	NC_000071.7:118707202
chromosome_05	121622711	C	T	C3H	4	NC_000071.7:119102878
chromosome_05	123460573	G	T	C3H	2	NC_000071.7:120946284
chromosome_05	124318013	C	T	C3H	4	NC_000071.7:121795577
chromosome_05	128452936	A	G	C3H	4	NC_000071.7:125956494
chromosome_05	129209719	A	G	C3H	4	NC_000071.7:126721597
chromosome_05	131359068	G	A	C3H	1	NC_000071.7:128865621
chromosome_05	137749261	C	T	C3H	1	NC_000071.7:135264427
chromosome_05	140839541	C	T	C3H	2	NC_000071.7:138245958
chromosome_05	143683326	C	T	C3H	1	NC_000071.7:140999903
chromosome_05	144041533	A	G	C3H	2	NC_000071.7:141353345
chromosome_05	144610177	C	A	C3H	1
chromosome_05	144610178	T	A	C3H	1
chromosome_05	145064933	C	G	C3H	1	NC_000071.7:142368397
chromosome_05	147663845	T	C	C3H	2	NC_000071.7:144973784
chromosome_05	151531183	C	T	C3H	3	NC_000071.7:148611967
chromosome_05	152353291	A	C	C3H	4	NC_000071.7:149410910
chromosome_05	154199092	C	A	C3H	1	NC_000071.7:151249222
chromosome_05	154200481	C	A	C3H	3	NC_000071.7:151250611
chromosome_06	8329007	G	C	C3H	4	NC_000072.7:4798807
chromosome_06	9803351	T	C	C3H	4	NC_000072.7:6268958
chromosome_06	10294327	G	A	C3H	1	NC_000072.7:6756272
chromosome_06	11720697	G	A	C3H	1	NC_000072.7:8185554
chromosome_06	12144504	C	T	C3H	2	NC_000072.7:8609352
chromosome_06	12837289	G	T	C3H	1	NC_000072.7:9301982
chromosome_06	14779507	A	C	C3H	2	NC_000072.7:11248816
chromosome_06	15917195	G	A	C3H	3	NC_000072.7:12384532
chromosome_06	16067999	C	T	C3H	2	NC_000072.7:12535326
chromosome_06	17702985	C	A	C3H	2
chromosome_06	17988413	G	A	C3H	1
chromosome_06	17991064	C	T	C3H	2
chromosome_06	20554639	T	G	C3H	4	NC_000072.7:17001177
chromosome_06	21825572	G	A	C3H	2	NC_000072.7:18262673
chromosome_06	22622455	C	G	C3H	2	NC_000072.7:19057908
chromosome_06	23628952	C	G	C3H	2	NC_000072.7:20064380
chromosome_06	24174301	A	G	C3H	2	NC_000072.7:20609694
chromosome_06	24468832	T	G	C3H	1	NC_000072.7:20904193
chromosome_06	24728894	G	T	C3H	1	NC_000072.7:21164025
chromosome_06	25870843	A	T	C3H	2	NC_000072.7:22305316
chromosome_06	26530394	A	C	C3H	2	NC_000072.7:22936540
chromosome_06	26876710	G	A	C3H	1	NC_000072.7:23211640
chromosome_06	28819382	G	T	C3H	4
chromosome_06	33755181	G	A	C3H	3	NC_000072.7:30059392
chromosome_06	35877359	C	G	C3H	3	NC_000072.7:32181037
chromosome_06	36120645	C	T	C3H	4	NC_000072.7:32423789
chromosome_06	45574966	A	G	C3H	2	NC_000072.7:41888337
chromosome_06	48101985	T	C	C3H	1
chromosome_06	49168832	A	T	C3H	1	NC_000072.7:45471378
chromosome_06	50132728	T	C	C3H	1	NC_000072.7:46435283
chromosome_06	52095105	T	A	C3H	2	NC_000072.7:48116531
chromosome_06	54707316	C	T	C3H	2	NC_000072.7:50748347
chromosome_06	55661971	A	G	C3H	3	NC_000072.7:51701284
chromosome_06	55924580	C	T	C3H	1	NC_000072.7:51963603
chromosome_06	57781527	C	A	C3H	4	NC_000072.7:53820405
chromosome_06	60129579	G	C	C3H	1	NC_000072.7:56174193
chromosome_06	61114833	G	C	C3H	2	NC_000072.7:57153152
chromosome_06	63229832	G	A	C3H	4	NC_000072.7:59266610
chromosome_06	63443605	G	A	C3H	1	NC_000072.7:59480001
chromosome_06	63663942	C	T	C3H	2	NC_000072.7:59700317
chromosome_06	64287114	C	T	C3H	4	NC_000072.7:60322815
chromosome_06	66127480	C	T	C3H	2	NC_000072.7:62162558
chromosome_06	66934141	G	A	C3H	2	NC_000072.7:62969046
chromosome_06	66937097	C	T	C3H	3	NC_000072.7:62972002
chromosome_06	68003000	C	G	C3H	2	NC_000072.7:64045938
chromosome_06	73723079	G	A	C3H	1	NC_000072.7:69779550
chromosome_06	73876709	A	T	C3H	3	NC_000072.7:69933155
chromosome_06	75479923	C	T	C3H	2	NC_000072.7:71512266
chromosome_06	76965384	A	G	C3H	4	NC_000072.7:72987976
chromosome_06	78596178	T	A	C3H	4	NC_000072.7:74654791
chromosome_06	78930875	C	A	C3H	2	NC_000072.7:74988464
chromosome_06	79259641	C	A	C3H	2	NC_000072.7:75336554
chromosome_06	81382914	G	T	C3H	1	NC_000072.7:77434554
chromosome_06	84705737	C	A	C3H	3	NC_000072.7:80755832
chromosome_06	85640996	G	A	C3H	1	NC_000072.7:81690462
chromosome_06	92980894	G	A	C3H	3	NC_000072.7:89028103
chromosome_06	99808818	C	G	C3H	3	NC_000072.7:95829040
chromosome_06	100583448	G	A	C3H	4	NC_000072.7:96602306
chromosome_06	103972422	T	G	C3H	3	NC_000072.7:99984619
chromosome_06	105565099	T	G	C3H	4	NC_000072.7:101575330
chromosome_06	105712956	G	C	C3H	3	NC_000072.7:101723432
chromosome_06	105747424	G	A	C3H	3	NC_000072.7:101757952
chromosome_06	105887754	G	T	C3H	1	NC_000072.7:101890169
chromosome_06	106461806	T	G	C3H	3	NC_000072.7:102464406
chromosome_06	106924503	A	C	C3H	2	NC_000072.7:102929291
chromosome_06	106972265	C	T	C3H	2	NC_000072.7:102977006
chromosome_06	107591135	C	A	C3H	1	NC_000072.7:103595902
chromosome_06	107721646	T	G	C3H	1	NC_000072.7:103733362
chromosome_06	108157829	C	T	C3H	1	NC_000072.7:104164430
chromosome_06	108463296	G	T	C3H	4	NC_000072.7:104495584
chromosome_06	110237420	C	T	C3H	1	NC_000072.7:106282984
chromosome_06	113841893	A	G	C3H	2	NC_000072.7:109885601
chromosome_06	113873829	T	A	C3H	3	NC_000072.7:109917278
chromosome_06	114756271	G	T	C3H	1	NC_000072.7:110788187
chromosome_06	117000117	G	A	C3H	4	NC_000072.7:113044479
chromosome_06	118723208	T	C	C3H	3	NC_000072.7:114698703
chromosome_06	121363595	C	G	C3H	4	NC_000072.7:117374314
chromosome_06	121607442	T	A	C3H	3	NC_000072.7:117618187
chromosome_06	122121345	G	A	C3H	2	NC_000072.7:118131858
chromosome_06	123270699	C	T	C3H	3	NC_000072.7:119279605
chromosome_06	125365974	G	A	C3H	1	NC_000072.7:121364365
chromosome_06	125842605	G	A	C3H	4	NC_000072.7:121842626
chromosome_06	125904419	G	A	C3H	3	NC_000072.7:121904469
chromosome_06	126758839	A	T	C3H	3	NC_000072.7:122777540
chromosome_06	129081377	G	A	C3H	2	NC_000072.7:125220986
chromosome_06	129960934	G	A	C3H	4	NC_000072.7:126109307
chromosome_06	130642732	G	A	C3H	3	NC_000072.7:126789938
chromosome_06	130841991	C	T	C3H	1	NC_000072.7:126988310
chromosome_06	133206408	A	C	C3H	1	NC_000072.7:129330864
chromosome_06	133563428	G	T	C3H	4	NC_000072.7:129699047
chromosome_06	134024878	T	C	C3H	1	NC_000072.7:130402714
chromosome_06	135237885	T	A	C3H	1
chromosome_06	135315592	G	A	C3H	2	NC_000072.7:131769143
chromosome_06	139431939	C	T	C3H	3	NC_000072.7:135743330
chromosome_06	142264053	A	T	C3H	1	NC_000072.7:138484263
chromosome_06	143260754	C	A	C3H	2	NC_000072.7:139476789
chromosome_06	145202804	C	T	C3H	4	NC_000072.7:141401041
chromosome_06	145488839	G	C	C3H	2	NC_000072.7:141686793
chromosome_06	146350564	T	G	C3H	3	NC_000072.7:142547310
chromosome_06	146835424	G	A	C3H	3	NC_000072.7:143031724
chromosome_06	147796958	C	T	C3H	2
chromosome_07	10792554	G	A	C3H	3	NC_000073.7:3391814
chromosome_07	12595298	C	A	C3H	4	NC_000073.7:5336697
chromosome_07	14748570	C	A	C3H	2	NC_000073.7:7488269
chromosome_07	14857105	G	T	C3H	1	NC_000073.7:7596800
chromosome_07	19664125	T	C	C3H	4	NC_000073.7:12383123
chromosome_07	22444292	A	G	C3H	3	NC_000073.7:15134200
chromosome_07	22444322	T	G	C3H	3	NC_000073.7:15134230
chromosome_07	22444500	T	C	C3H	3	NC_000073.7:15134408
chromosome_07	22444649	A	G	C3H	3	NC_000073.7:15134557
chromosome_07	31071278	C	A	C3H	2	NC_000073.7:25622938
chromosome_07	32358005	G	C	C3H	3	NC_000073.7:26908727
chromosome_07	33528834	A	C	C3H	2	NC_000073.7:28083418
chromosome_07	33608135	G	C	C3H	3	NC_000073.7:28162713
chromosome_07	40090176	C	T	C3H	1
chromosome_07	41141553	C	T	C3H	1	NC_000073.7:35910312
chromosome_07	41356488	C	T	C3H	3	NC_000073.7:36125538
chromosome_07	44616770	C	T	C3H	2	NC_000073.7:39228847
chromosome_07	46097119	C	A	C3H	3	NC_000073.7:40704981
chromosome_07	46340883	A	C	C3H	3	NC_000073.7:40948497
chromosome_07	60099606	G	A	C3H	4	NC_000073.7:54608573
chromosome_07	60572139	G	A	C3H	2
chromosome_07	64501577	A	T	C3H	3	NC_000073.7:59069815
chromosome_07	64562237	C	T	C3H	1	NC_000073.7:59112006
chromosome_07	64968706	T	G	C3H	1
chromosome_07	65381547	A	T	C3H	2	NC_000073.7:59775341
chromosome_07	67531771	C	T	C3H	3	NC_000073.7:62019615
chromosome_07	67565224	A	T	C3H	1	NC_000073.7:62053131
chromosome_07	69184786	C	T	C3H	4	NC_000073.7:63674156
chromosome_07	70322669	G	A	C3H	4	NC_000073.7:64792651
chromosome_07	77747640	T	C	C3H	1	NC_000073.7:72197000
chromosome_07	80350875	T	C	C3H	1	NC_000073.7:74789983
chromosome_07	81837736	G	A	C3H	3	NC_000073.7:76302602
chromosome_07	82675137	T	A	C3H	4	NC_000073.7:77109700
chromosome_07	85639217	G	T	C3H	1	NC_000073.7:80040033
chromosome_07	85878877	C	T	C3H	4	NC_000073.7:80279420
chromosome_07	89158006	T	A	C3H	3	NC_000073.7:83560049
chromosome_07	90476907	A	T	C3H	2	NC_000073.7:84887171
chromosome_07	94810162	T	A	C3H	1	NC_000073.7:89249978
chromosome_07	95083580	G	A	C3H	4	NC_000073.7:89559245
chromosome_07	98991051	C	A	C3H	1	NC_000073.7:93462452
chromosome_07	98991052	A	G	C3H	1	NC_000073.7:93462453
chromosome_07	99182967	G	T	C3H	2	NC_000073.7:93647889
chromosome_07	101521408	A	G	C3H	2	NC_000073.7:95976931
chromosome_07	102536318	A	T	C3H	4	NC_000073.7:97015864
chromosome_07	108911766	G	A	C3H	2	NC_000073.7:103359876
chromosome_07	109264195	C	T	C3H	3	NC_000073.7:103705429
chromosome_07	109628222	A	G	C3H	3	NC_000073.7:104157123
chromosome_07	118897781	A	G	C3H	1
chromosome_07	122766346	A	G	C3H	4	NC_000073.7:117560348
chromosome_07	127055628	C	T	C3H	1	NC_000073.7:121854581
chromosome_07	127246563	A	G	C3H	3	NC_000073.7:122045424
chromosome_07	133495118	A	C	C3H	1	NC_000073.7:128281677
chromosome_07	134932414	C	A	C3H	4	NC_000073.7:129718821
chromosome_07	135278983	T	C	C3H	4	NC_000073.7:130064494
chromosome_07	138568355	A	C	C3H	4	NC_000073.7:133347011
chromosome_07	138679299	C	G	C3H	1	NC_000073.7:133457950
chromosome_07	138922949	G	A	C3H	2	NC_000073.7:133700888
chromosome_07	143349438	C	T	C3H	1	NC_000073.7:138116220
chromosome_07	144784476	G	A	C3H	1	NC_000073.7:139542638
chromosome_07	145407742	G	A	C3H	4	NC_000073.7:140165801
chromosome_07	146230353	C	T	C3H	1	NC_000073.7:140987602
chromosome_07	148038943	A	C	C3H	2	NC_000073.7:142795163
chromosome_08	4946775	G	A	C3H	2	NC_000074.7:5356892
chromosome_08	8049416	C	T	C3H	2	NC_000074.7:8458364
chromosome_08	8146122	A	G	C3H	4	NC_000074.7:8555067
chromosome_08	9956526	C	T	C3H	3	NC_000074.7:10357597
chromosome_08	9990199	T	C	C3H	4	NC_000074.7:10391270
chromosome_08	11074534	T	G	C3H	4	NC_000074.7:11474474
chromosome_08	11691830	C	T	C3H	1	NC_000074.7:12091186
chromosome_08	12271259	C	T	C3H	2	NC_000074.7:12669693
chromosome_08	16917910	A	G	C3H	3	NC_000074.7:17313481
chromosome_08	17290185	T	C	C3H	2	NC_000074.7:17691186
chromosome_08	18441446	C	T	C3H	2	NC_000074.7:18844025
chromosome_08	24899402	C	T	C3H	2
chromosome_08	25250372	G	T	C3H	3
chromosome_08	26192432	C	T	C3H	1	NC_000074.7:22737394
chromosome_08	28541490	G	C	C3H	2	NC_000074.7:25088477
chromosome_08	32021889	T	A	C3H	1	NC_000074.7:28469284
chromosome_08	32801530	G	A	C3H	2	NC_000074.7:29248998
chromosome_08	33498682	A	T	C3H	4	NC_000074.7:29950845
chromosome_08	34102449	A	T	C3H	1	NC_000074.7:30576180
chromosome_08	38839142	T	G	C3H	3	NC_000074.7:35276230
chromosome_08	40452625	C	G	C3H	1	NC_000074.7:36860485
chromosome_08	42777706	G	A	C3H	1	NC_000074.7:39171323
chromosome_08	43387191	G	A	C3H	4	NC_000074.7:39796099
chromosome_08	47419858	A	G	C3H	2	NC_000074.7:43870331
chromosome_08	51233792	G	C	C3H	3	NC_000074.7:47677114
chromosome_08	54415904	C	T	C3H	1	NC_000074.7:50845316
chromosome_08	61268749	T	C	C3H	2	NC_000074.7:57742544
chromosome_08	67690257	C	A	C3H	1	NC_000074.7:64194267
chromosome_08	70291295	T	A	C3H	2	NC_000074.7:66787446
chromosome_08	70523042	T	A	C3H	3
chromosome_08	71145544	T	A	C3H	1	NC_000074.7:67628979
chromosome_08	71753687	G	A	C3H	2	NC_000074.7:68234780
chromosome_08	73603205	A	C	C3H	4	NC_000074.7:70092752
chromosome_08	77007728	A	T	C3H	2	NC_000074.7:73733674
chromosome_08	79785808	C	A	C3H	1	NC_000074.7:76541536
chromosome_08	79864456	C	G	C3H	4	NC_000074.7:76620187
chromosome_08	83216857	C	T	C3H	1	NC_000074.7:79978265
chromosome_08	84107526	C	T	C3H	3	NC_000074.7:80868901
chromosome_08	87767440	C	T	C3H	2	NC_000074.7:84510092
chromosome_08	93665874	A	G	C3H	4	NC_000074.7:90408820
chromosome_08	94476720	G	A	C3H	2	NC_000074.7:91219651
chromosome_08	95235844	C	A	C3H	2
chromosome_08	98480887	C	T	C3H	4	NC_000074.7:95228119
chromosome_08	98707310	C	A	C3H	2	NC_000074.7:95459862
chromosome_08	100051910	T	G	C3H	2	NC_000074.7:96825577
chromosome_08	102472152	T	G	C3H	4	NC_000074.7:99208421
chromosome_08	104129212	G	T	C3H	2	NC_000074.7:100858405
chromosome_08	105330849	G	A	C3H	3	NC_000074.7:102079445
chromosome_08	107220811	T	C	C3H	3	NC_000074.7:103985054
chromosome_08	107315022	G	T	C3H	3	NC_000074.7:104077814
chromosome_08	109175116	G	T	C3H	1	NC_000074.7:105931501
chromosome_08	112613789	C	T	C3H	4	NC_000074.7:109362681
chromosome_08	112926140	A	G	C3H	3	NC_000074.7:109666070
chromosome_08	116738569	G	T	C3H	3	NC_000074.7:113475080
chromosome_08	117124259	G	A	C3H	4	NC_000074.7:113860453
chromosome_08	118037166	C	T	C3H	3	NC_000074.7:114773243
chromosome_08	118532117	C	T	C3H	2	NC_000074.7:115268767
chromosome_08	121683932	C	A	C3H	4	NC_000074.7:118407050
chromosome_08	122134498	G	C	C3H	4	NC_000074.7:118857212
chromosome_08	122582467	C	T	C3H	3	NC_000074.7:119304133
chromosome_08	123167492	G	A	C3H	2	NC_000074.7:119888675
chromosome_08	124474449	G	T	C3H	1	NC_000074.7:121194092
chromosome_08	125075041	C	A	C3H	4	NC_000074.7:121794154
chromosome_08	126698711	G	A	C3H	2	NC_000074.7:123423475
chromosome_08	129280243	G	A	C3H	2	NC_000074.7:125891914
chromosome_08	132687796	G	A	C3H	1	NC_000074.7:129259649
chromosome_09	6462650	C	A	C3H	3	NC_000075.7:3674326
chromosome_09	12405214	G	A	C3H	4	NC_000075.7:9615586
chromosome_09	16128181	T	G	C3H	4	NC_000075.7:13330029
chromosome_09	16399776	G	A	C3H	4	NC_000075.7:13601332
chromosome_09	18236156	T	G	C3H	4	NC_000075.7:15432356
chromosome_09	23583019	C	T	C3H	2	NC_000075.7:20776261
chromosome_09	23955121	G	T	C3H	2	NC_000075.7:21147837
chromosome_09	24700800	C	A	C3H	3	NC_000075.7:21893486
chromosome_09	24990733	G	A	C3H	1	NC_000075.7:22182608
chromosome_09	25373485	C	A	C3H	2	NC_000075.7:22565334
chromosome_09	28808718	C	T	C3H	2	NC_000075.7:25997235
chromosome_09	33037199	A	G	C3H	4	NC_000075.7:30222261
chromosome_09	33343317	T	G	C3H	1	NC_000075.7:30528242
chromosome_09	34008322	T	G	C3H	4	NC_000075.7:31187610
chromosome_09	35864571	T	A	C3H	3	NC_000075.7:33054013
chromosome_09	36230020	A	G	C3H	4	NC_000075.7:33427649
chromosome_09	36383236	A	C	C3H	1	NC_000075.7:33580064
chromosome_09	38404932	C	T	C3H	1	NC_000075.7:35624966
chromosome_09	38664561	G	T	C3H	4	NC_000075.7:35871941
chromosome_09	40624068	C	T	C3H	3
chromosome_09	42252838	A	C	C3H	1	NC_000075.7:39430292
chromosome_09	43899944	T	G	C3H	1
chromosome_09	45409793	T	G	C3H	3
chromosome_09	46076905	C	A	C3H	1	NC_000075.7:43243089
chromosome_09	47410949	C	T	C3H	1	NC_000075.7:44572728
chromosome_09	47608356	C	T	C3H	1	NC_000075.7:44770321
chromosome_09	54099565	A	G	C3H	1	NC_000075.7:51236164
chromosome_09	55219348	C	T	C3H	2	NC_000075.7:52374705
chromosome_09	56174333	G	A	C3H	4	NC_000075.7:53338854
chromosome_09	56315065	C	A	C3H	1
chromosome_09	56315093	A	G	C3H	2	NC_000075.7:53479562
chromosome_09	70789229	A	G	C3H	2	NC_000075.7:67943054
chromosome_09	74522491	A	G	C3H	3
chromosome_09	75197791	C	G	C3H	2	NC_000075.7:72342541
chromosome_09	76699344	C	T	C3H	2	NC_000075.7:73848860
chromosome_09	77772238	G	A	C3H	3	NC_000075.7:74917435
chromosome_09	78045443	G	A	C3H	4	NC_000075.7:75186943
chromosome_09	80963489	T	G	C3H	4	NC_000075.7:78043483
chromosome_09	82342669	G	A	C3H	3	NC_000075.7:79425230
chromosome_09	84996497	T	A	C3H	1	NC_000075.7:82100480
chromosome_09	85419856	G	A	C3H	1	NC_000075.7:82523634
chromosome_09	86005538	A	G	C3H	4	NC_000075.7:83108017
chromosome_09	89070224	G	A	C3H	1	NC_000075.7:86179798
chromosome_09	91832688	T	C	C3H	3
chromosome_09	91832701	C	T	C3H	3
chromosome_09	92231573	C	G	C3H	3	NC_000075.7:89376168
chromosome_09	92796730	C	T	C3H	4	NC_000075.7:89936407
chromosome_09	98612734	G	C	C3H	2	NC_000075.7:95760425
chromosome_09	99463235	G	A	C3H	4	NC_000075.7:96621309
chromosome_09	106981106	C	A	C3H	4	NC_000075.7:104136586
chromosome_09	107168627	C	T	C3H	3	NC_000075.7:104320709
chromosome_09	108566400	G	A	C3H	2
chromosome_09	109211100	A	G	C3H	4	NC_000075.7:106320253
chromosome_09	114555469	A	C	C3H	1	NC_000075.7:111657695
chromosome_09	115087848	G	A	C3H	1	NC_000075.7:112195745
chromosome_09	115897020	T	A	C3H	3	NC_000075.7:113010050
chromosome_09	116487501	C	T	C3H	3	NC_000075.7:113598953
chromosome_09	117463229	A	C	C3H	3	NC_000075.7:114571841
chromosome_09	118265108	C	T	C3H	2	NC_000075.7:115390097
chromosome_09	118803148	C	T	C3H	2	NC_000075.7:115926450
chromosome_09	122057450	G	C	C3H	3	NC_000075.7:119166994
chromosome_09	122605956	T	A	C3H	1	NC_000075.7:119714708
chromosome_09	122772028	C	T	C3H	4	NC_000075.7:119879879
chromosome_09	124045430	G	C	C3H	2	NC_000075.7:121164601
chromosome_09	125183922	G	A	C3H	4	NC_000075.7:122317479
chromosome_10	13028743	G	A	C3H	4	NC_000076.7:4143273
chromosome_10	15882165	C	T	C3H	4	NC_000076.7:6956334
chromosome_10	18834595	C	T	C3H	1	NC_000076.7:9902332
chromosome_10	21118331	G	A	C3H	2	NC_000076.7:12172754
chromosome_10	31037520	A	G	C3H	3	NC_000076.7:22045395
chromosome_10	32405463	C	T	C3H	2	NC_000076.7:23412925
chromosome_10	34114997	C	T	C3H	4	NC_000076.7:25143497
chromosome_10	37035484	G	A	C3H	2	NC_000076.7:28086251
chromosome_10	38824549	T	G	C3H	4	NC_000076.7:29858646
chromosome_10	39052680	G	C	C3H	1	NC_000076.7:30086726
chromosome_10	46538883	A	G	C3H	3	NC_000076.7:37575787
chromosome_10	47240703	T	C	C3H	4	NC_000076.7:38277641
chromosome_10	51906635	A	C	C3H	3	NC_000076.7:42939516
chromosome_10	53099003	C	T	C3H	1	NC_000076.7:44126551
chromosome_10	54288881	T	A	C3H	3	NC_000076.7:45315973
chromosome_10	55838723	A	T	C3H	1	NC_000076.7:46871607
chromosome_10	56242751	A	C	C3H	3	NC_000076.7:47275519
chromosome_10	56748554	A	G	C3H	3	NC_000076.7:47785561
chromosome_10	56826399	A	C	C3H	1	NC_000076.7:47863385
chromosome_10	58792071	C	A	C3H	3	NC_000076.7:49834369
chromosome_10	60396053	G	A	C3H	3	NC_000076.7:51437935
chromosome_10	62992171	C	G	C3H	4	NC_000076.7:54031142
chromosome_10	63402700	A	C	C3H	4	NC_000076.7:54441674
chromosome_10	63639764	G	T	C3H	2	NC_000076.7:54678746
chromosome_10	63639766	A	G	C3H	2	NC_000076.7:54678748
chromosome_10	63985943	T	G	C3H	1	NC_000076.7:55024924
chromosome_10	64360019	A	G	C3H	4	NC_000076.7:55398949
chromosome_10	66293296	C	T	C3H	4	NC_000076.7:57341644
chromosome_10	67597170	C	T	C3H	2	NC_000076.7:58639151
chromosome_10	67899062	C	T	C3H	2	NC_000076.7:58941060
chromosome_10	70363128	C	T	C3H	4	NC_000076.7:61408181
chromosome_10	71349034	C	T	C3H	1	NC_000076.7:62382487
chromosome_10	72763173	T	A	C3H	1	NC_000076.7:63795364
chromosome_10	73745380	G	A	C3H	1	NC_000076.7:64777171
chromosome_10	76285303	A	G	C3H	3	NC_000076.7:67342034
chromosome_10	76829832	G	A	C3H	1	NC_000076.7:67883569
chromosome_10	79929262	A	G	C3H	1	NC_000076.7:70997241
chromosome_10	80404570	G	T	C3H	1	NC_000076.7:71471456
chromosome_10	81116221	G	A	C3H	1	NC_000076.7:72184126
chromosome_10	85892538	A	G	C3H	4	NC_000076.7:76949373
chromosome_10	88022397	C	T	C3H	4	NC_000076.7:79079465
chromosome_10	88022402	T	G	C3H	4	NC_000076.7:79079470
chromosome_10	88022403	G	T	C3H	4	NC_000076.7:79079471
chromosome_10	88022429	C	G	C3H	4	NC_000076.7:79079497
chromosome_10	88022437	C	T	C3H	4	NC_000076.7:79079505
chromosome_10	88869365	G	A	C3H	3	NC_000076.7:79920438
chromosome_10	91259446	T	C	C3H	2
chromosome_10	93578398	C	T	C3H	1	NC_000076.7:84720314
chromosome_10	95712265	C	T	C3H	1	NC_000076.7:86848244
chromosome_10	99084504	A	C	C3H	1	NC_000076.7:90221343
chromosome_10	101321734	T	C	C3H	3	NC_000076.7:92437911
chromosome_10	102520911	A	C	C3H	3	NC_000076.7:93662865
chromosome_10	102906531	C	T	C3H	4	NC_000076.7:94044369
chromosome_10	104426106	G	A	C3H	3	NC_000076.7:95553166
chromosome_10	105342407	G	A	C3H	1	NC_000076.7:96474000
chromosome_10	107207184	G	A	C3H	2	NC_000076.7:98339216
chromosome_10	109012485	C	T	C3H	3	NC_000076.7:100160809
chromosome_10	109798539	G	T	C3H	4	NC_000076.7:100803555
chromosome_10	109893822	G	A	C3H	2	NC_000076.7:100896290
chromosome_10	109932785	G	A	C3H	2
chromosome_10	110856354	G	C	C3H	3	NC_000076.7:101855428
chromosome_10	111177585	C	T	C3H	3	NC_000076.7:102176014
chromosome_10	114607918	C	A	C3H	2	NC_000076.7:105648138
chromosome_10	114607942	A	T	C3H	2	NC_000076.7:105648162
chromosome_10	120380032	A	T	C3H	1	NC_000076.7:111427509
chromosome_10	122905787	G	A	C3H	4	NC_000076.7:113952152
chromosome_10	123124094	G	A	C3H	3	NC_000076.7:114170334
chromosome_10	123551626	G	A	C3H	1	NC_000076.7:114598665
chromosome_10	123926379	G	T	C3H	1	NC_000076.7:114973480
chromosome_10	124210925	T	A	C3H	4	NC_000076.7:115258051
chromosome_10	124803824	T	A	C3H	4	NC_000076.7:115849843
chromosome_10	125132478	T	G	C3H	3	NC_000076.7:116178534
chromosome_10	126504502	T	A	C3H	2	NC_000076.7:117553313
chromosome_10	131607414	A	C	C3H	1	NC_000076.7:122696548
chromosome_10	132596474	C	T	C3H	3	NC_000076.7:123678223
chromosome_10	135557109	C	T	C3H	3	NC_000076.7:126641074
chromosome_10	136886286	C	T	C3H	2	NC_000076.7:127965890
chromosome_10	138147277	C	G	C3H	2	NC_000076.7:129217242
chromosome_11	1875467	G	T	C3H	1	NC_000077.7:4330895
chromosome_11	3539849	C	T	C3H	4	NC_000077.7:5997480
chromosome_11	3945347	C	A	C3H	1
chromosome_11	4841157	G	A	C3H	2	NC_000077.7:7291402
chromosome_11	5050291	T	A	C3H	3	NC_000077.7:7505513
chromosome_11	7555627	A	G	C3H	1	NC_000077.7:10020928
chromosome_11	9015886	C	A	C3H	4	NC_000077.7:11456282
chromosome_11	9818618	A	C	C3H	3	NC_000077.7:12263842
chromosome_11	10322313	A	G	C3H	3	NC_000077.7:12744656
chromosome_11	13825332	A	G	C3H	3	NC_000077.7:16278598
chromosome_11	13825333	T	C	C3H	3	NC_000077.7:16278599
chromosome_11	19384373	T	G	C3H	1	NC_000077.7:21858555
chromosome_11	20314171	C	A	C3H	2	NC_000077.7:22792255
chromosome_11	23917868	T	C	C3H	1	NC_000077.7:26435532
chromosome_11	23923234	A	G	C3H	3	NC_000077.7:26440857
chromosome_11	24870603	C	T	C3H	1	NC_000077.7:27381012
chromosome_11	32399697	C	A	C3H	3	NC_000077.7:34846489
chromosome_11	34913993	G	A	C3H	4	NC_000077.7:37335354
chromosome_11	44087182	G	A	C3H	2	NC_000077.7:46512791
chromosome_11	44732408	G	A	C3H	4	NC_000077.7:47162014
chromosome_11	45769908	T	G	C3H	3	NC_000077.7:48199087
chromosome_11	46575616	A	G	C3H	2	NC_000077.7:49003424
chromosome_11	54262543	A	C	C3H	1	NC_000077.7:56686193
chromosome_11	54452392	C	A	C3H	2	NC_000077.7:56876136
chromosome_11	54931990	G	A	C3H	3
chromosome_11	57833593	A	T	C3H	4
chromosome_11	58430340	T	A	C3H	2	NC_000077.7:60783680
chromosome_11	60984000	G	A	C3H	2	NC_000077.7:63317429
chromosome_11	63530364	T	G	C3H	3	NC_000077.7:65870859
chromosome_11	69279871	C	T	C3H	3	NC_000077.7:71517113
chromosome_11	69647271	C	T	C3H	4	NC_000077.7:71884475
chromosome_11	71895468	G	A	C3H	1	NC_000077.7:74130908
chromosome_11	74746476	G	A	C3H	1	NC_000077.7:76963779
chromosome_11	75449113	C	G	C3H	1	NC_000077.7:77666264
chromosome_11	77507018	C	T	C3H	2	NC_000077.7:79716899
chromosome_11	78138086	G	A	C3H	3	NC_000077.7:80343965
chromosome_11	83146597	C	G	C3H	1	NC_000077.7:85332680
chromosome_11	83146598	T	G	C3H	1	NC_000077.7:85332681
chromosome_11	83190824	C	T	C3H	4	NC_000077.7:85376897
chromosome_11	85383306	A	T	C3H	4	NC_000077.7:87594255
chromosome_11	85852373	G	A	C3H	1	NC_000077.7:88054778
chromosome_11	86107929	C	T	C3H	2	NC_000077.7:88304706
chromosome_11	86968690	G	A	C3H	2	NC_000077.7:89173277
chromosome_11	89263682	A	C	C3H	4	NC_000077.7:91477354
chromosome_11	89607943	C	T	C3H	4	NC_000077.7:91821410
chromosome_11	90162011	T	G	C3H	1	NC_000077.7:92374485
chromosome_11	94551226	A	G	C3H	4	NC_000077.7:96784477
chromosome_11	94704564	C	T	C3H	4	NC_000077.7:96935827
chromosome_11	96310230	T	G	C3H	1	NC_000077.7:98534379
chromosome_11	97698543	C	A	C3H	4
chromosome_11	101937873	C	T	C3H	3	NC_000077.7:104126251
chromosome_11	102638599	C	G	C3H	1
chromosome_11	103394904	G	T	C3H	4	NC_000077.7:105567206
chromosome_11	105751114	C	T	C3H	1	NC_000077.7:107909022
chromosome_11	110420315	G	A	C3H	2	NC_000077.7:112558522
chromosome_11	110821616	G	A	C3H	4	NC_000077.7:112958635
chromosome_11	111925368	C	G	C3H	1	NC_000077.7:114051835
chromosome_11	112167326	C	T	C3H	3	NC_000077.7:114293171
chromosome_11	113724167	G	A	C3H	3	NC_000077.7:115851961
chromosome_11	116500879	T	C	C3H	1	NC_000077.7:118659163
chromosome_12	5094922	G	A	C3H	4	NC_000078.7:5516428
chromosome_12	6367093	G	T	C3H	4	NC_000078.7:6776462
chromosome_12	8948671	A	T	C3H	2	NC_000078.7:9328887
chromosome_12	10761930	T	C	C3H	1
chromosome_12	10761939	A	C	C3H	1
chromosome_12	11396510	G	A	C3H	4
chromosome_12	17996208	C	G	C3H	2
chromosome_12	18748503	A	C	C3H	2
chromosome_12	18773622	T	C	C3H	2
chromosome_12	19166982	G	T	C3H	3
chromosome_12	19884361	T	G	C3H	1
chromosome_12	19990457	C	G	C3H	1	NC_000078.7:20977415
chromosome_12	19990475	A	G	C3H	1	NC_000078.7:20977397
chromosome_12	20056929	G	C	C3H	1	NC_000078.7:20917041
chromosome_12	20423916	A	G	C3H	1
chromosome_12	21770144	A	C	C3H	3
chromosome_12	22421346	G	A	C3H	1
chromosome_12	22731394	G	T	C3H	1
chromosome_12	26933868	G	A	C3H	4	NC_000078.7:27243698
chromosome_12	28574193	A	C	C3H	1	NC_000078.7:28835046
chromosome_12	29067704	C	G	C3H	3	NC_000078.7:29330214
chromosome_12	30404020	C	A	C3H	4	NC_000078.7:30677470
chromosome_12	30651166	T	C	C3H	4	NC_000078.7:30928790
chromosome_12	31332856	G	T	C3H	2
chromosome_12	33216685	A	G	C3H	4	NC_000078.7:33494670
chromosome_12	33216686	A	G	C3H	4	NC_000078.7:33494671
chromosome_12	35056501	T	C	C3H	1	NC_000078.7:35305236
chromosome_12	35056502	G	T	C3H	1	NC_000078.7:35305237
chromosome_12	36230724	G	T	C3H	1	NC_000078.7:36445225
chromosome_12	40526304	G	A	C3H	4	NC_000078.7:40736522
chromosome_12	41836265	C	T	C3H	3	NC_000078.7:42036805
chromosome_12	42270443	C	G	C3H	1	NC_000078.7:42470963
chromosome_12	45694350	G	A	C3H	4	NC_000078.7:45956534
chromosome_12	47059554	C	G	C3H	4	NC_000078.7:47309422
chromosome_12	47164545	A	C	C3H	1	NC_000078.7:47413844
chromosome_12	47457876	T	A	C3H	4	NC_000078.7:47720599
chromosome_12	51220993	A	C	C3H	4	NC_000078.7:51460767
chromosome_12	54397607	A	T	C3H	1	NC_000078.7:54613021
chromosome_12	59646280	G	A	C3H	2	NC_000078.7:59879856
chromosome_12	61258346	T	C	C3H	4	NC_000078.7:61426922
chromosome_12	61296488	G	T	C3H	2	NC_000078.7:61464303
chromosome_12	61595446	C	A	C3H	4	NC_000078.7:61773460
chromosome_12	61595456	C	A	C3H	4	NC_000078.7:61773470
chromosome_12	62353367	T	C	C3H	2	NC_000078.7:62527124
chromosome_12	62449212	G	C	C3H	3
chromosome_12	63041913	G	C	C3H	2	NC_000078.7:63223495
chromosome_12	63367605	C	T	C3H	1	NC_000078.7:63558343
chromosome_12	63931155	G	A	C3H	3	NC_000078.7:64122658
chromosome_12	64182927	T	A	C3H	2	NC_000078.7:64387701
chromosome_12	64796952	C	T	C3H	3	NC_000078.7:64997580
chromosome_12	67564730	G	A	C3H	2	NC_000078.7:67752855
chromosome_12	72904646	C	T	C3H	2	NC_000078.7:73091734
chromosome_12	73974775	G	T	C3H	3	NC_000078.7:74143531
chromosome_12	76064921	C	T	C3H	3	NC_000078.7:76213788
chromosome_12	76639898	C	T	C3H	4	NC_000078.7:76790814
chromosome_12	76886352	G	A	C3H	3	NC_000078.7:77030572
chromosome_12	83172109	G	A	C3H	2	NC_000078.7:83354465
chromosome_12	87737361	G	A	C3H	2
chromosome_12	87903898	G	T	C3H	4
chromosome_12	89720837	C	T	C3H	1	NC_000078.7:89908088
chromosome_12	90243945	C	A	C3H	3	NC_000078.7:90430240
chromosome_12	90357604	T	G	C3H	3	NC_000078.7:90536614
chromosome_12	93813987	A	C	C3H	4	NC_000078.7:94091905
chromosome_12	94560267	G	A	C3H	3	NC_000078.7:94837783
chromosome_12	95165508	C	A	C3H	3	NC_000078.7:95442706
chromosome_12	96031097	G	T	C3H	3	NC_000078.7:96308322
chromosome_12	96393395	C	T	C3H	2	NC_000078.7:96670601
chromosome_12	96502648	A	C	C3H	4	NC_000078.7:96779803
chromosome_12	96523657	G	A	C3H	2	NC_000078.7:96800815
chromosome_12	96656003	A	G	C3H	2	NC_000078.7:96933163
chromosome_12	96858952	T	G	C3H	3	NC_000078.7:97136089
chromosome_12	96945939	A	G	C3H	4	NC_000078.7:97223045
chromosome_12	97068053	G	A	C3H	3	NC_000078.7:97345151
chromosome_12	100742947	C	T	C3H	3	NC_000078.7:101030911
chromosome_12	101839107	C	A	C3H	4	NC_000078.7:102126560
chromosome_12	103436376	G	A	C3H	3	NC_000078.7:103727603
chromosome_12	104928256	A	G	C3H	4	NC_000078.7:105218205
chromosome_12	106318522	C	A	C3H	1	NC_000078.7:106603770
chromosome_12	112781342	C	T	C3H	4	NC_000078.7:113078820
chromosome_12	114718435	A	G	C3H	2	NC_000078.7:114981101
chromosome_12	114882203	T	G	C3H	3	NC_000078.7:115140945
chromosome_12	115693454	G	A	C3H	1	NC_000078.7:116031520
chromosome_12	117326974	C	T	C3H	3
chromosome_12	117597342	G	A	C3H	2	NC_000078.7:117914181
chromosome_12	117838577	C	T	C3H	2
chromosome_13	12434870	G	A	C3H	2	NC_000079.7:12447937
chromosome_13	14436336	G	A	C3H	1	NC_000079.7:14603033
chromosome_13	14440463	G	T	C3H	4	NC_000079.7:14607160
chromosome_13	17199553	T	A	C3H	3
chromosome_13	19315500	G	A	C3H	1	NC_000079.7:19414653
chromosome_13	19747082	A	T	C3H	1	NC_000079.7:19874254
chromosome_13	22110197	G	C	C3H	2	NC_000079.7:22225401
chromosome_13	23970119	T	G	C3H	3	NC_000079.7:24081733
chromosome_13	24710577	G	A	C3H	2	NC_000079.7:24821401
chromosome_13	26550410	C	T	C3H	1	NC_000079.7:26651685
chromosome_13	27969988	G	T	C3H	2	NC_000079.7:28064062
chromosome_13	27972957	G	A	C3H	2	NC_000079.7:28067031
chromosome_13	29320521	T	C	C3H	2	NC_000079.7:29417288
chromosome_13	35637376	A	G	C3H	2	NC_000079.7:35753539
chromosome_13	40995352	G	A	C3H	3	NC_000079.7:41066212
chromosome_13	43303923	C	T	C3H	3	NC_000079.7:43375637
chromosome_13	43450549	A	C	C3H	4	NC_000079.7:43529125
chromosome_13	44626435	C	T	C3H	4	NC_000079.7:44716240
chromosome_13	44844379	C	T	C3H	3	NC_000079.7:44936254
chromosome_13	48049131	A	C	C3H	2	NC_000079.7:48131709
chromosome_13	51290255	C	T	C3H	1	NC_000079.7:51360858
chromosome_13	56318227	C	T	C3H	2	NC_000079.7:56380571
chromosome_13	56436147	G	T	C3H	1	NC_000079.7:56498800
chromosome_13	57834773	G	A	C3H	2	NC_000079.7:57882963
chromosome_13	59187953	C	A	C3H	3	NC_000079.7:59226653
chromosome_13	60206324	A	C	C3H	4	NC_000079.7:60244849
chromosome_13	61557699	G	A	C3H	3	NC_000079.7:61593608
chromosome_13	63053014	G	C	C3H	4	NC_000079.7:63088758
chromosome_13	66676243	T	C	C3H	4	NC_000079.7:66977040
chromosome_13	66676252	A	C	C3H	4	NC_000079.7:66977049
chromosome_13	66855409	G	T	C3H	2	NC_000079.7:67127225
chromosome_13	67482104	C	A	C3H	4
chromosome_13	67848962	G	C	C3H	2	NC_000079.7:68114657
chromosome_13	67848963	G	T	C3H	2	NC_000079.7:68114658
chromosome_13	68284051	A	G	C3H	4
chromosome_13	68742309	C	G	C3H	1	NC_000079.7:69074812
chromosome_13	71884068	C	T	C3H	2	NC_000079.7:72229867
chromosome_13	73259461	A	T	C3H	4	NC_000079.7:73613719
chromosome_13	74343884	T	G	C3H	4	NC_000079.7:74700899
chromosome_13	77066540	A	G	C3H	2	NC_000079.7:77438995
chromosome_13	77818552	C	T	C3H	3	NC_000079.7:78253997
chromosome_13	77829056	A	G	C3H	4	NC_000079.7:78264490
chromosome_13	79134052	T	C	C3H	2	NC_000079.7:79557483
chromosome_13	87020633	G	A	C3H	1
chromosome_13	88081533	G	T	C3H	1	NC_000079.7:88530376
chromosome_13	89589919	C	T	C3H	4	NC_000079.7:90027264
chromosome_13	90457949	G	A	C3H	3	NC_000079.7:90893233
chromosome_13	98205135	G	A	C3H	1	NC_000079.7:98597239
chromosome_13	106510497	C	T	C3H	3	NC_000079.7:106875904
chromosome_13	106667149	T	C	C3H	1	NC_000079.7:107025842
chromosome_13	106881177	C	T	C3H	1	NC_000079.7:107239849
chromosome_13	107112177	C	G	C3H	2	NC_000079.7:107464427
chromosome_13	108718991	C	T	C3H	3	NC_000079.7:109071151
chromosome_13	108887939	T	C	C3H	3	NC_000079.7:109239577
chromosome_13	109656036	T	A	C3H	3	NC_000079.7:110018409
chromosome_13	110787837	C	G	C3H	1	NC_000079.7:111158168
chromosome_13	111885512	G	A	C3H	4	NC_000079.7:112260150
chromosome_13	114348455	T	C	C3H	2	NC_000079.7:114728897
chromosome_13	117033134	C	T	C3H	2	NC_000079.7:117407681
chromosome_13	117429232	A	C	C3H	1	NC_000079.7:117808024
chromosome_13	117429234	A	C	C3H	1	NC_000079.7:117808026
chromosome_13	118730080	A	C	C3H	2	NC_000079.7:119100634
chromosome_14	3294272	G	A	C3H	1	NC_000080.7:5180030
chromosome_14	3371980	C	T	C3H	4	NC_000080.7:5265971
chromosome_14	5342372	T	C	C3H	3	NC_000080.7:7246489
chromosome_14	8842501	G	T	C3H	3	NC_000080.7:10657260
chromosome_14	8993688	T	C	C3H	4	NC_000080.7:10809233
chromosome_14	9233804	T	C	C3H	1
chromosome_14	9285501	C	A	C3H	1
chromosome_14	9620563	A	T	C3H	4
chromosome_14	10880531	G	A	C3H	3	NC_000080.7:12682891
chromosome_14	11407710	G	A	C3H	1	NC_000080.7:13206844
chromosome_14	12102997	C	T	C3H	2	NC_000080.7:13896654
chromosome_14	12115769	C	T	C3H	2	NC_000080.7:13909401
chromosome_14	12697434	C	A	C3H	4	NC_000080.7:14479896
chromosome_14	13633754	G	A	C3H	2	NC_000080.7:15481736
chromosome_14	15151889	G	A	C3H	1
chromosome_14	15216157	A	G	C3H	1
chromosome_14	16305664	G	A	C3H	1	NC_000080.7:18501959
chromosome_14	24798099	G	A	C3H	3	NC_000080.7:27457809
chromosome_14	25635702	G	A	C3H	1	NC_000080.7:28285588
chromosome_14	25890172	G	A	C3H	2
chromosome_14	26705343	C	T	C3H	2	NC_000080.7:29357610
chromosome_14	26873387	C	T	C3H	2	NC_000080.7:29525573
chromosome_14	29204938	C	T	C3H	1	NC_000080.7:31843084
chromosome_14	33067093	G	A	C3H	1	NC_000080.7:35701540
chromosome_14	33786370	T	C	C3H	2	NC_000080.7:36419696
chromosome_14	37368522	G	A	C3H	3	NC_000080.7:40000597
chromosome_14	40347854	G	A	C3H	1	NC_000080.7:42971440
chromosome_14	41363935	G	C	C3H	3	NC_000080.7:44265920
chromosome_14	41937238	A	G	C3H	4	NC_000080.7:44838694
chromosome_14	45142477	A	C	C3H	1	NC_000080.7:48020254
chromosome_14	45142479	G	A	C3H	1	NC_000080.7:48020256
chromosome_14	47622598	A	G	C3H	1
chromosome_14	49314657	A	G	C3H	4
chromosome_14	51793462	C	T	C3H	1	NC_000080.7:54701171
chromosome_14	59503830	G	A	C3H	2	NC_000080.7:62413038
chromosome_14	59909975	C	T	C3H	3	NC_000080.7:62805942
chromosome_14	60731979	C	T	C3H	2	NC_000080.7:63622810
chromosome_14	61679473	G	A	C3H	1	NC_000080.7:64555419
chromosome_14	62652590	C	T	C3H	1	NC_000080.7:65552573
chromosome_14	66242341	A	G	C3H	4
chromosome_14	67083717	A	G	C3H	2
chromosome_14	69249105	C	G	C3H	2	NC_000080.7:72374648
chromosome_14	71079874	G	T	C3H	1	NC_000080.7:74210587
chromosome_14	76727511	T	A	C3H	2	NC_000080.7:79833016
chromosome_14	79633863	G	T	C3H	1	NC_000080.7:82739073
chromosome_14	80157938	T	G	C3H	4	NC_000080.7:83262602
chromosome_14	80795646	G	A	C3H	2	NC_000080.7:83900265
chromosome_14	82204154	T	A	C3H	3	NC_000080.7:85308292
chromosome_14	82342220	T	G	C3H	3	NC_000080.7:85446340
chromosome_14	82937529	T	C	C3H	4	NC_000080.7:86041619
chromosome_14	83026777	A	G	C3H	2	NC_000080.7:86130869
chromosome_14	83315151	C	T	C3H	4	NC_000080.7:86416620
chromosome_14	84520701	G	T	C3H	4	NC_000080.7:87600362
chromosome_14	85855445	G	A	C3H	4
chromosome_14	89427106	C	A	C3H	3	NC_000080.7:92501933
chromosome_14	91523550	A	G	C3H	4	NC_000080.7:94579848
chromosome_14	91685666	C	T	C3H	2	NC_000080.7:94743072
chromosome_14	92929480	T	C	C3H	4	NC_000080.7:96003834
chromosome_14	93140900	T	G	C3H	2	NC_000080.7:96205672
chromosome_14	93204905	A	G	C3H	1
chromosome_14	95715060	C	T	C3H	3	NC_000080.7:98801147
chromosome_14	97673587	C	T	C3H	2	NC_000080.7:100769012
chromosome_14	101590827	C	A	C3H	4	NC_000080.7:104695447
chromosome_14	103560855	G	T	C3H	2	NC_000080.7:106668239
chromosome_14	108546483	T	G	C3H	3	NC_000080.7:111666466
chromosome_14	110155457	T	G	C3H	3	NC_000080.7:113278523
chromosome_14	110990260	G	T	C3H	4	NC_000080.7:114113202
chromosome_14	112685405	G	A	C3H	2	NC_000080.7:115808200
chromosome_14	114747173	T	G	C3H	1
chromosome_14	115816469	C	T	C3H	2	NC_000080.7:118969094
chromosome_14	116703106	C	A	C3H	1	NC_000080.7:119851650
chromosome_14	118434813	A	C	C3H	3	NC_000080.7:121594521
chromosome_15	2053777	C	T	C3H	3	NC_000081.7:4870546
chromosome_15	3912187	G	A	C3H	2	NC_000081.7:6722092
chromosome_15	6667008	G	A	C3H	1	NC_000081.7:9459532
chromosome_15	7348299	C	T	C3H	1	NC_000081.7:10140813
chromosome_15	10112280	G	A	C3H	1	NC_000081.7:12890731
chromosome_15	11076977	G	A	C3H	2	NC_000081.7:13843006
chromosome_15	12758364	C	T	C3H	3	NC_000081.7:15530652
chromosome_15	13557209	A	C	C3H	3	NC_000081.7:16327182
chromosome_15	15753686	C	T	C3H	2	NC_000081.7:18523166
chromosome_15	17393990	G	T	C3H	2	NC_000081.7:20232540
chromosome_15	17458454	T	A	C3H	2	NC_000081.7:20296999
chromosome_15	17458706	T	C	C3H	4	NC_000081.7:20297251
chromosome_15	18024538	G	A	C3H	4	NC_000081.7:20849629
chromosome_15	27985729	G	A	C3H	4	NC_000081.7:30804719
chromosome_15	29183753	G	A	C3H	3	NC_000081.7:31991157
chromosome_15	29223190	G	A	C3H	2	NC_000081.7:32030617
chromosome_15	31305168	A	G	C3H	4	NC_000081.7:34116171
chromosome_15	31637250	T	C	C3H	4	NC_000081.7:34445430
chromosome_15	34846840	G	A	C3H	2	NC_000081.7:37652831
chromosome_15	36409442	G	A	C3H	3	NC_000081.7:39227243
chromosome_15	36751863	T	A	C3H	4	NC_000081.7:39572081
chromosome_15	39487732	C	T	C3H	2	NC_000081.7:42291737
chromosome_15	45542911	A	G	C3H	2	NC_000081.7:48345385
chromosome_15	47016403	C	T	C3H	2	NC_000081.7:49816340
chromosome_15	47063787	A	C	C3H	2	NC_000081.7:49863732
chromosome_15	47275837	G	T	C3H	4	NC_000081.7:50075955
chromosome_15	47411384	T	G	C3H	4	NC_000081.7:50210110
chromosome_15	50255105	T	G	C3H	2	NC_000081.7:53049479
chromosome_15	55749114	G	A	C3H	1	NC_000081.7:58543400
chromosome_15	56406545	G	A	C3H	2	NC_000081.7:59193646
chromosome_15	57914810	G	T	C3H	4	NC_000081.7:60706956
chromosome_15	57914865	G	A	C3H	4	NC_000081.7:60707011
chromosome_15	59636023	C	T	C3H	4	NC_000081.7:62400997
chromosome_15	66954564	A	C	C3H	1	NC_000081.7:69736603
chromosome_15	66975351	G	T	C3H	4	NC_000081.7:69757001
chromosome_15	68162239	T	G	C3H	4	NC_000081.7:70939072
chromosome_15	73956036	G	A	C3H	3	NC_000081.7:76779647
chromosome_15	73988688	T	G	C3H	2	NC_000081.7:76812163
chromosome_15	74731287	G	T	C3H	2	NC_000081.7:77583774
chromosome_15	74731289	C	T	C3H	2	NC_000081.7:77583776
chromosome_15	75351278	T	G	C3H	2	NC_000081.7:78204227
chromosome_15	77167951	G	A	C3H	2	NC_000081.7:80021754
chromosome_15	80546221	T	C	C3H	3	NC_000081.7:83398890
chromosome_15	81341962	G	A	C3H	1	NC_000081.7:84194389
chromosome_15	82122733	G	A	C3H	2	NC_000081.7:84980741
chromosome_15	82267964	G	A	C3H	4	NC_000081.7:85125956
chromosome_15	84357619	A	G	C3H	3	NC_000081.7:87206669
chromosome_15	85611095	G	T	C3H	3	NC_000081.7:88448764
chromosome_15	85852249	G	T	C3H	3	NC_000081.7:88689897
chromosome_15	86042573	C	A	C3H	4	NC_000081.7:88880225
chromosome_15	87608105	G	A	C3H	4	NC_000081.7:90445546
chromosome_15	88692337	A	C	C3H	4	NC_000081.7:91554347
chromosome_15	96608172	T	A	C3H	1	NC_000081.7:99430221
chromosome_15	99279374	C	A	C3H	4	NC_000081.7:102055466
chromosome_16	6499994	G	T	C3H	1	NC_000082.7:3975586
chromosome_16	6920606	A	T	C3H	3	NC_000082.7:4395701
chromosome_16	7616528	C	T	C3H	2	NC_000082.7:5091587
chromosome_16	8157397	T	A	C3H	1	NC_000082.7:5637991
chromosome_16	10016727	G	A	C3H	2	NC_000082.7:7487921
chromosome_16	12548834	A	C	C3H	4	NC_000082.7:10032902
chromosome_16	15113941	A	G	C3H	1	NC_000082.7:12622922
chromosome_16	17362341	G	A	C3H	3	NC_000082.7:14884497
chromosome_16	20107452	C	T	C3H	4	NC_000082.7:17626949
chromosome_16	20384919	C	G	C3H	3	NC_000082.7:17904403
chromosome_16	21867175	G	A	C3H	2	NC_000082.7:19380757
chromosome_16	26271190	C	T	C3H	4	NC_000082.7:23773179
chromosome_16	28406453	A	C	C3H	1	NC_000082.7:25913491
chromosome_16	29026757	G	T	C3H	2	NC_000082.7:26532676
chromosome_16	30100597	G	A	C3H	1
chromosome_16	30547032	C	T	C3H	2	NC_000082.7:28071839
chromosome_16	31085415	G	A	C3H	2	NC_000082.7:28609425
chromosome_16	33939392	C	A	C3H	2
chromosome_16	36418022	A	C	C3H	4	NC_000082.7:33959025
chromosome_16	36793195	C	A	C3H	1
chromosome_16	37756111	T	A	C3H	3	NC_000082.7:35292830
chromosome_16	41254757	A	G	C3H	2	NC_000082.7:38791323
chromosome_16	43465356	T	G	C3H	2	NC_000082.7:40998795
chromosome_16	50243541	G	A	C3H	4	NC_000082.7:47745357
chromosome_16	54104882	C	T	C3H	2	NC_000082.7:51618228
chromosome_16	56343189	T	A	C3H	4	NC_000082.7:53864668
chromosome_16	57773772	A	G	C3H	4
chromosome_16	60978218	C	T	C3H	2	NC_000082.7:58499582
chromosome_16	61076699	G	A	C3H	2	NC_000082.7:58598125
chromosome_16	61076700	A	G	C3H	2	NC_000082.7:58598126
chromosome_16	62771260	T	C	C3H	3	NC_000082.7:60281773
chromosome_16	64377958	G	T	C3H	4	NC_000082.7:61885728
chromosome_16	64998702	G	T	C3H	2	NC_000082.7:62501167
chromosome_16	65474081	G	A	C3H	3
chromosome_16	65952148	G	A	C3H	1	NC_000082.7:63456430
chromosome_16	66876919	C	T	C3H	2	NC_000082.7:64378203
chromosome_16	67378351	G	C	C3H	1	NC_000082.7:64882658
chromosome_16	68146033	C	T	C3H	3	NC_000082.7:65640720
chromosome_16	70678391	G	A	C3H	2	NC_000082.7:68173488
chromosome_16	72094495	T	G	C3H	4	NC_000082.7:69590579
chromosome_16	72094497	G	T	C3H	2	NC_000082.7:69590581
chromosome_16	80957156	C	A	C3H	1	NC_000082.7:78472387
chromosome_16	81732793	G	A	C3H	3	NC_000082.7:79247877
chromosome_16	82175507	C	T	C3H	3	NC_000082.7:79690574
chromosome_16	83015736	T	G	C3H	3	NC_000082.7:80529827
chromosome_16	85046447	T	C	C3H	2	NC_000082.7:82556174
chromosome_16	85868961	G	C	C3H	3	NC_000082.7:83380159
chromosome_16	86774601	G	A	C3H	1	NC_000082.7:84277726
chromosome_16	87136157	T	G	C3H	4	NC_000082.7:84639216
chromosome_16	88203474	A	G	C3H	3	NC_000082.7:85701440
chromosome_16	88301447	A	G	C3H	4	NC_000082.7:85800756
chromosome_16	91457643	C	G	C3H	2	NC_000082.7:88965493
chromosome_16	91506095	G	A	C3H	1	NC_000082.7:89013932
chromosome_16	92120165	G	A	C3H	1	NC_000082.7:89627233
chromosome_16	92230042	A	C	C3H	4	NC_000082.7:89736316
chromosome_16	95300996	G	A	C3H	1	NC_000082.7:92800301
chromosome_16	95666347	G	A	C3H	1	NC_000082.7:93161942
chromosome_16	98401762	G	A	C3H	4	NC_000082.7:95898688
chromosome_16	98949213	G	A	C3H	1	NC_000082.7:96442335
chromosome_16	99136642	A	T	C3H	4	NC_000082.7:96629631
chromosome_17	1929773	A	G	C3H	3	NC_000083.7:4208439
chromosome_17	1963522	T	G	C3H	2	NC_000083.7:4244376
chromosome_17	5745326	T	G	C3H	4	NC_000083.7:8203805
chromosome_17	7188789	A	G	C3H	4	NC_000083.7:9656515
chromosome_17	7267257	C	A	C3H	3	NC_000083.7:9736368
chromosome_17	7512498	G	A	C3H	3	NC_000083.7:9980783
chromosome_17	12645829	T	C	C3H	3	NC_000083.7:14926175
chromosome_17	18277031	T	A	C3H	1	NC_000083.7:20557963
chromosome_17	19170704	T	G	C3H	1	NC_000083.7:21497124
chromosome_17	20351852	G	A	C3H	4	NC_000083.7:22679966
chromosome_17	23337513	G	A	C3H	4	NC_000083.7:25677971
chromosome_17	30660796	G	T	C3H	2	NC_000083.7:32504953
chromosome_17	32479807	T	A	C3H	4	NC_000083.7:34375522
chromosome_17	33544616	A	G	C3H	3
chromosome_17	34531398	C	T	C3H	1	NC_000083.7:36548540
chromosome_17	38191740	G	A	C3H	4	NC_000083.7:39895588
chromosome_17	39146171	C	T	C3H	4	NC_000083.7:40777043
chromosome_17	39397205	T	A	C3H	4	NC_000083.7:41028751
chromosome_17	39623331	G	T	C3H	3	NC_000083.7:41256584
chromosome_17	45161673	G	A	C3H	2	NC_000083.7:46771818
chromosome_17	45725139	C	T	C3H	4	NC_000083.7:47335336
chromosome_17	47719724	C	T	C3H	3	NC_000083.7:49335505
chromosome_17	48142686	C	T	C3H	3	NC_000083.7:49767188
chromosome_17	49879049	C	T	C3H	1	NC_000083.7:51491691
chromosome_17	54371310	C	A	C3H	2	NC_000083.7:56026329
chromosome_17	55999073	G	A	C3H	4	NC_000083.7:57652538
chromosome_17	59389071	A	C	C3H	1	NC_000083.7:61034600
chromosome_17	59960651	G	A	C3H	1	NC_000083.7:61606058
chromosome_17	62097993	T	G	C3H	4	NC_000083.7:63738222
chromosome_17	64085030	T	C	C3H	4	NC_000083.7:65723805
chromosome_17	66121768	C	T	C3H	2	NC_000083.7:67759662
chromosome_17	67207353	A	T	C3H	1
chromosome_17	67207377	T	C	C3H	1
chromosome_17	68364161	G	A	C3H	4	NC_000083.7:70006304
chromosome_17	76204615	A	C	C3H	1	NC_000083.7:77789353
chromosome_17	82898488	C	A	C3H	1	NC_000083.7:84512730
chromosome_17	83639714	G	A	C3H	4	NC_000083.7:85252009
chromosome_17	84576552	C	A	C3H	2	NC_000083.7:86181802
chromosome_17	85054119	G	A	C3H	4	NC_000083.7:86657503
chromosome_17	86922784	G	A	C3H	4	NC_000083.7:88498653
chromosome_17	88820994	C	A	C3H	3	NC_000083.7:90419520
chromosome_17	89691342	A	C	C3H	1	NC_000083.7:91269335
chromosome_18	3588652	G	A	C3H	4	NC_000084.7:4614480
chromosome_18	4323569	C	A	C3H	4	NC_000084.7:5341977
chromosome_18	6122217	G	A	C3H	2	NC_000084.7:7143781
chromosome_18	8760728	C	T	C3H	1	NC_000084.7:9803182
chromosome_18	10669316	A	T	C3H	3	NC_000084.7:11694822
chromosome_18	10753675	G	T	C3H	4	NC_000084.7:11782745
chromosome_18	11362020	C	A	C3H	2	NC_000084.7:12385302
chromosome_18	13601978	G	A	C3H	2	NC_000084.7:14610793
chromosome_18	14521094	A	G	C3H	3	NC_000084.7:15505581
chromosome_18	14872878	A	G	C3H	2	NC_000084.7:15864245
chromosome_18	16921432	A	C	C3H	4	NC_000084.7:17912280
chromosome_18	18556870	T	G	C3H	3	NC_000084.7:19547656
chromosome_18	25438091	T	C	C3H	3	NC_000084.7:26411150
chromosome_18	32505725	G	A	C3H	2	NC_000084.7:33499672
chromosome_18	33850862	C	T	C3H	4	NC_000084.7:34870423
chromosome_18	34113066	T	A	C3H	1	NC_000084.7:35132277
chromosome_18	34922373	T	C	C3H	3	NC_000084.7:35929837
chromosome_18	35159347	G	A	C3H	4	NC_000084.7:36166467
chromosome_18	37890690	A	C	C3H	2	NC_000084.7:38910298
chromosome_18	38637482	G	C	C3H	4	NC_000084.7:39648993
chromosome_18	41943249	G	A	C3H	1	NC_000084.7:42944489
chromosome_18	42904381	A	C	C3H	2	NC_000084.7:43890627
chromosome_18	47392278	G	C	C3H	3	NC_000084.7:48361617
chromosome_18	48152400	G	T	C3H	2	NC_000084.7:49119485
chromosome_18	48888003	C	T	C3H	3	NC_000084.7:49828497
chromosome_18	54357025	C	T	C3H	2
chromosome_18	58141777	C	T	C3H	4	NC_000084.7:58991046
chromosome_18	58160853	T	G	C3H	2	NC_000084.7:59010130
chromosome_18	62497546	G	A	C3H	3	NC_000084.7:63343613
chromosome_18	63465771	G	A	C3H	1	NC_000084.7:64323755
chromosome_18	64072485	C	T	C3H	1	NC_000084.7:64930190
chromosome_18	64961204	G	T	C3H	2	NC_000084.7:65823040
chromosome_18	66363944	C	T	C3H	1	NC_000084.7:67217533
chromosome_18	67927893	C	T	C3H	2	NC_000084.7:68789198
chromosome_18	76441673	T	A	C3H	1	NC_000084.7:77294013
chromosome_18	80683560	A	C	C3H	3	NC_000084.7:81530287
chromosome_18	81270138	C	A	C3H	3	NC_000084.7:82115869
chromosome_18	82196009	A	G	C3H	4	NC_000084.7:83047410
chromosome_18	84773964	A	T	C3H	3	NC_000084.7:85618106
chromosome_18	87197405	C	T	C3H	1	NC_000084.7:88095464
chromosome_18	88380782	G	C	C3H	1	NC_000084.7:89278185
[truncated: 984 more rows]
