# Supplementary material for: The rate and spectrum of new mutations in mice inferred by long-read sequencing
Source: HighWire-hosted journal article supplement (doi:10.1101/gr.279982.124), 2024-12-02
Supplement: Supplemental_Table_S4.xlsx [file Supplemental_Table_S4.xlsx]

## Sheet: table_indel
# Table S4. List of insertions and deletions shorter than 50 bp (indels) found in all mice samples and strains, with their corresponding reference (REF) and alternate or mutated allele (ALT). Coordinates are given by chromosome and position (site, with 1-based coordinates), based on their respective reference genomes.
# When the indel was located in a microsatellite annotation, the repeat motif is given.
# Coordinates for the GRCm39 reference genome were obtained following the Minigraph-Cactus pangenome pipeline, and the halLiftover tool (see Methods).
CHROM	SITE	REF	ALT	STRAIN	SAMPLE	MS_MOTIF	GRCm39_COORDINATES
chromosome_01	6007637	ATTCTG	A	BL6	2	TTCTG	NC_000067.7:8392804
chromosome_01	7702997	GCTAT	G	BL6	4	CTAT	NC_000067.7:10088020
chromosome_01	8548075	GAAGA	G	BL6	4	AAGA
chromosome_01	9705956	G	GAGGA	BL6	3	GGAA	NC_000067.7:12088447
chromosome_01	12030084	G	GTGTTT	BL6	2	TGTTT	NC_000067.7:14403845
chromosome_01	12441626	A	AAAGG	BL6	5	AAGG	NC_000067.7:14814273
chromosome_01	12514707	AG	A	BL6	3		NC_000067.7:14887351
chromosome_01	18285260	C	CAAAAT	BL6	4	AAAAT	NC_000067.7:20651905
chromosome_01	21384493	GATAC	G	BL6	5	GATA	NC_000067.7:23749394
chromosome_01	23796535	A	AT	BL6	2		NC_000067.7:26157280
chromosome_01	44753506	CATCT	C	BL6	5	TATC	NC_000067.7:47071891
chromosome_01	53939887	CCTATAT	C	BL6	3	TATATC	NC_000067.7:56256352
chromosome_01	56271877	T	TTTCC	BL6	4	TTCC	NC_000067.7:58587271
chromosome_01	60748086	T	TTAGA	BL6	3	TAGA	NC_000067.7:63059889
chromosome_01	66433513	AATAG	A	BL6	2	ATAG	NC_000067.7:68739406
chromosome_01	66859424	TATAA	T	BL6	5	ATAA	NC_000067.7:69163098
chromosome_01	74393904	CTTATT	C	BL6	4	TTATT	NC_000067.7:76688754
chromosome_01	75823130	C	CGTGT	BL6	3	CGTGCGTGTGTGTGTG	NC_000067.7:78117012
chromosome_01	77205813	G	GAGGA	BL6	3	AGGA	NC_000067.7:79492430
chromosome_01	79403932	A	AAAAT	BL6	4	AAAT	NC_000067.7:81689311
chromosome_01	81489733	C	CCTAT	BL6	2	CCTA	NC_000067.7:83773937
chromosome_01	84237902	G	GTATC	BL6	4	ATCTATCT
chromosome_01	92836136	T	TTATC	BL6	4	ATCT	NC_000067.7:92134740
chromosome_01	94525861	TTTTA	T	BL6	3	TTTA	NC_000067.7:93823695
chromosome_01	107731675	G	GTCTA	BL6	4	TATC	NC_000067.7:107009204
chromosome_01	120020835	G	GAGGA	BL6	4	AGGA	NC_000067.7:119295011
chromosome_01	124005904	A	AATAG	BL6	2	AGAT	NC_000067.7:123275932
chromosome_01	133359275	AATAG	A	BL6	5	AGAT	NC_000067.7:132619983
chromosome_01	140197139	G	GATT	BL6	5	ATT	NC_000067.7:139443805
chromosome_01	143792303	G	GTATT	BL6	4		NC_000067.7:143037840
chromosome_01	145242346	A	ATATG	BL6	3	ATAC	NC_000067.7:144486249
chromosome_01	146616354	C	CATCT	BL6	3	TCTA	NC_000067.7:145856688
chromosome_01	147912436	A	AATTT	BL6	3	ATTT	NC_000067.7:147151755
chromosome_01	148838995	G	GTA	BL6	3	TATATGTATG	NC_000067.7:148064925
chromosome_01	149213514	GA	G	BL6	3		NC_000067.7:148439436
chromosome_01	150976257	T	TGATA	BL6	3	GATA	NC_000067.7:150200893
chromosome_01	151626795	TATAG	T	BL6	5	ATAG	NC_000067.7:150851414
chromosome_01	153806806	T	TAC	BL6	4		NC_000067.7:153007868
chromosome_01	156320853	T	TTTTTG	BL6	3	TTTTG	NC_000067.7:155519262
chromosome_01	167617778	A	AAGAT	BL6	3	ATAG	NC_000067.7:166807528
chromosome_01	170621781	GTGTT	G	BL6	5	TGTT	NC_000067.7:169809715
chromosome_01	170963492	CCACT	C	BL6	5	CACT	NC_000067.7:170151420
chromosome_01	172070176	T	TGGCCCTGAGAATATGTGGTCC	BL6	4		NC_000067.7:171211392
chromosome_01	172173193	TCTAA	T	BL6	4		NC_000067.7:171314410
chromosome_01	175645038	ATATC	A	BL6	2	TCTA	NC_000067.7:174784986
chromosome_01	176043933	A	AATAG	BL6	3	ATAG	NC_000067.7:175182284
chromosome_01	183208422	T	TTTC	BL6	3	TTC	NC_000067.7:182334680
chromosome_01	186669089	G	GGA	BL6	4	AG	NC_000067.7:185792675
chromosome_01	190123582	T	TGATA	BL6	3	GATA	NC_000067.7:189244622
chromosome_01	191382727	T	TGA	BL6	2	GA	NC_000067.7:190492537
chromosome_02	1410085	T	TTAGA	BL6	3	TAGA	NC_000068.8:4449200
chromosome_02	5639427	T	TATAA	BL6	5	ATAA	NC_000068.8:8670267
chromosome_02	9799406	C	CATAG	BL6	2	ATAG	NC_000068.8:12825205
chromosome_02	10673330	T	TTTTA	BL6	4	TTTA	NC_000068.8:13698562
chromosome_02	11190913	CATCT	C	BL6	5	TATC	NC_000068.8:14215218
chromosome_02	22167824	CCTTTTCTTTT	C	BL6	2	TTTCT	NC_000068.8:25171565
chromosome_02	29895090	TTTCC	T	BL6	2	TTCC	NC_000068.8:32894562
chromosome_02	39758139	G	GTTGTT	BL6	4	TTGTT	NC_000068.8:42740052
chromosome_02	39776061	A	ATATAT	BL6	4	TATAT	NC_000068.8:42757974
chromosome_02	43139887	A	AAAC	BL6	4	AAC	NC_000068.8:46119637
chromosome_02	50297552	T	TTCTATA	BL6	5	TCTATA	NC_000068.8:53260069
chromosome_02	51102745	C	CCTAT	BL6	4	ATCT	NC_000068.8:54064874
chromosome_02	52803566	CATACACAACACA	C	BL6	4	ACATACACAACAC	NC_000068.8:55765415
chromosome_02	54975889	T	TGATA	BL6	3	TAGA	NC_000068.8:57935270
chromosome_02	58893360	ATTTGTT	A	BL6	4	TTTGTT	NC_000068.8:61846637
chromosome_02	59597157	A	AATCT	BL6	5	ATCT	NC_000068.8:62550184
chromosome_02	61661632	C	CAGAT	BL6	3	AGAT	NC_000068.8:64613394
chromosome_02	64782041	CCAGTAAACGGCAT	C	BL6	5		NC_000068.8:67727191
chromosome_02	66140983	ACTAT	A	BL6	4	CTAT	NC_000068.8:69085532
chromosome_02	69433247	A	ATG	BL6	3	TG	NC_000068.8:72362581
chromosome_02	71152892	T	TTATC	BL6	3	TATC	NC_000068.8:74081599
chromosome_02	71153465	T	TTATC	BL6	5	TATC	NC_000068.8:74082172
chromosome_02	73003815	TTCTA	T	BL6	5	TCTA	NC_000068.8:75932005
chromosome_02	85793524	A	AAT	BL6	3		NC_000068.8:88716004
chromosome_02	87509929	T	TGATA	BL6	3	GATA	NC_000068.8:90505177
chromosome_02	109226718	CTTTTTTTTTTTTTTT	C	BL6	3	T	NC_000068.8:112214165
chromosome_02	115330142	CAAAT	C	BL6	5	AAAT	NC_000068.8:118312773
chromosome_02	123306970	T	TTAGA	BL6	4	TAGA	NC_000068.8:126285434
chromosome_02	126201439	C	CCTATT	BL6	5	CTATT	NC_000068.8:129178692
chromosome_02	126264311	T	TTTA	BL6	4	TTA	NC_000068.8:129241558
chromosome_02	127839063	C	CTCTA	BL6	4	ATCTACCT	NC_000068.8:130814881
chromosome_02	130580071	C	CATCT	BL6	3	ATCT	NC_000068.8:133550177
chromosome_02	144264674	C	CATCT	BL6	5	TATC	NC_000068.8:147225199
chromosome_02	151544893	G	GGAGCCGAGCC	BL6	5	GAGCC	NC_000068.8:154499033
chromosome_02	153448515	CCTTTT	C	BL6	3	TCCCC	NC_000068.8:156401292
chromosome_02	162928356	C	CCTAT	BL6	3	CTAT	NC_000068.8:165874331
chromosome_02	163591830	T	TCAAA	BL6	4	CAAA	NC_000068.8:166537435
chromosome_02	164136074	T	TTTTG	BL6	4	TTTG	NC_000068.8:167081683
chromosome_02	165555748	TAATAAATA	T	BL6	3	AATA	NC_000068.8:168498235
chromosome_02	165989287	TTTA	T	BL6	4	TTA	NC_000068.8:168931610
chromosome_02	166063018	C	CATCT	BL6	5	TCTA	NC_000068.8:169004910
chromosome_02	169047674	TGATA	T	BL6	3	ATAG	NC_000068.8:171982808
chromosome_02	170762430	C	CAGAGA	BL6	2	AGAGA	NC_000068.8:173690418
chromosome_03	2490689	G	GGATA	BL6	5	GATA	NC_000069.7:5156126
chromosome_03	2797525	T	TATAG	BL6	3	ATAG	NC_000069.7:5462940
chromosome_03	5537146	G	GAATAAT	BL6	4	AAT	NC_000069.7:8192068
chromosome_03	11604491	AC	A	BL6	3		NC_000069.7:14254564
chromosome_03	15311754	AAAG	A	BL6	4		NC_000069.7:17954292
chromosome_03	22020347	G	GTAGA	BL6	4	TAGA	NC_000069.7:24661688
chromosome_03	22360879	AT	A	BL6	5		NC_000069.7:25002212
chromosome_03	30459952	A	ATATC	BL6	3	TATC	NC_000069.7:33092628
chromosome_03	33375873	C	CTTTA	BL6	4	TTTA	NC_000069.7:36005820
chromosome_03	34161265	CTTTA	C	BL6	3	TTTA	NC_000069.7:36790699
chromosome_03	37711113	T	TATAG	BL6	3	AGATATAGAT	NC_000069.7:40338708
chromosome_03	46926458	A	AAAAT	BL6	2	AAAT	NC_000069.7:49549809
chromosome_03	48502031	G	GATTT	BL6	4	ATTT	NC_000069.7:51120942
chromosome_03	49201859	A	AATATAC	BL6	2	ATATAT	NC_000069.7:51818990
chromosome_03	54178887	T	TCTTC	BL6	3	CTTC	NC_000069.7:56793340
chromosome_03	60139473	TA	T	BL6	4		NC_000069.7:62736540
chromosome_03	60480065	T	TTTAG	BL6	2	TTAG	NC_000069.7:63077118
chromosome_03	63378777	C	CATCT	BL6	4	ATCT	NC_000069.7:65975553
chromosome_03	63711033	T	TGAGA	BL6	3	TG	NC_000069.7:66307790
chromosome_03	67929889	G	GAGAT	BL6	2	AGAT	NC_000069.7:70525483
chromosome_03	75166422	T	TTTA	BL6	2	TTA	NC_000069.7:77759329
chromosome_03	81964749	TATATA	T	BL6	5	ATATA	NC_000069.7:84537045
chromosome_03	83059564	A	AAGAT	BL6	5	AGAT	NC_000069.7:85631820
chromosome_03	97802908	C	CGATA	BL6	4	GATA	NC_000069.7:100294055
chromosome_03	102892871	GTCTCTCTCTC	G	BL6	5	TCTC	NC_000069.7:105381686
chromosome_03	107385501	C	CTTTA	BL6	4	TTTA	NC_000069.7:109680207
chromosome_03	107659455	A	ATGTG	BL6	4	GT	NC_000069.7:109954149
chromosome_03	108132396	TATATC	T	BL6	3	ATCAT	NC_000069.7:110427069
chromosome_03	108239820	G	GTATC	BL6	4	CTAT	NC_000069.7:110534487
chromosome_03	111058385	G	GTAGA	BL6	3	TAGA	NC_000069.7:113350037
chromosome_03	112049433	C	CATCT	BL6	3	TCTA	NC_000069.7:114340527
chromosome_03	112991799	A	AAGAT	BL6	2	AGAT	NC_000069.7:115282581
chromosome_03	116167002	C	CATATT	BL6	4	ATATT	NC_000069.7:118455337
chromosome_03	117280790	GAAC	G	BL6	2		NC_000069.7:119568820
chromosome_03	125578648	T	TTATC	BL6	2	TATC	NC_000069.7:127851352
chromosome_03	132028090	T	TGATA	BL6	4	AGAT	NC_000069.7:134296435
chromosome_03	136894150	TTTTTC	T	BL6	3	TTTTC	NC_000069.7:139159563
chromosome_03	139287409	C	CATGAG	BL6	5	ATGAG	NC_000069.7:141552592
chromosome_03	141028283	C	CCTAT	BL6	3	ATCT	NC_000069.7:143289429
chromosome_03	147812723	G	GGATA	BL6	4	ATAG	NC_000069.7:150065653
chromosome_03	151981856	T	TTTCC	BL6	5	TTCC	NC_000069.7:154230446
chromosome_04	4212051	C	CCAAA	BL6	4	CAAA	NC_000070.7:6519216
chromosome_04	7746117	TGATATA	T	BL6	2	ATATAG	NC_000070.7:10050179
chromosome_04	7980343	TATAG	T	BL6	2	ATAG	NC_000070.7:10281488
chromosome_04	8169257	GAGAAA	G	BL6	3	AGAAA	NC_000070.7:10470363
chromosome_04	15797668	T	TATAG	BL6	2	ATAG	NC_000070.7:18085418
chromosome_04	16612165	C	CAGAT	BL6	3	AGAT	NC_000070.7:18898843
chromosome_04	17545007	C	CTATAA	BL6	4	TATAA
chromosome_04	20283858	A	AATCT	BL6	2	ATCT	NC_000070.7:22561839
chromosome_04	21147482	C	CTTAT	BL6	4	TTAT	NC_000070.7:23425013
chromosome_04	21763766	GTAGA	G	BL6	2	ATAG	NC_000070.7:24041270
chromosome_04	24576724	T	TATC	BL6	3	ATC	NC_000070.7:26851996
chromosome_04	30547649	G	GAGAC	BL6	2	AGAC	NC_000070.7:32816242
chromosome_04	31381942	CATCT	C	BL6	2	ATCT	NC_000070.7:33648767
chromosome_04	31976118	T	TGATA	BL6	4	AGAT	NC_000070.7:34242431
chromosome_04	34637634	T	TA	BL6	3		NC_000070.7:36904546
chromosome_04	42231451	GA	G	BL6	3		NC_000070.7:44988832
chromosome_04	44054640	CATCT	C	BL6	4	ATCT	NC_000070.7:46806642
chromosome_04	44813943	C	CATCT	BL6	3	TATC	NC_000070.7:47565011
chromosome_04	46821210	T	TGATA	BL6	4	GATA	NC_000070.7:49571374
chromosome_04	47297815	GTTTC	G	BL6	3	TTTC	NC_000070.7:50047904
chromosome_04	49567847	T	TTAGA	BL6	2	TAGA	NC_000070.7:52315915
chromosome_04	59630616	A	AGAAG	BL6	2	AAGG	NC_000070.7:62361107
chromosome_04	61015596	T	TTATC	BL6	5	TATC	NC_000070.7:63740103
chromosome_04	62417873	C	CATAA	BL6	5	ATAA	NC_000070.7:65141589
chromosome_04	62905461	T	TATAA	BL6	3	ATAA	NC_000070.7:65628806
chromosome_04	65411909	G	GTCTA	BL6	5	TCTA	NC_000070.7:68134383
chromosome_04	70946459	G	GAATA	BL6	5	AAAT	NC_000070.7:73667693
chromosome_04	77483472	G	GTCTA	BL6	5	CTAT	NC_000070.7:80202580
chromosome_04	88870569	TTAAC	T	BL6	2	TAAC	NC_000070.7:91567863
chromosome_04	94839707	C	CAT	BL6	2	AT	NC_000070.7:97532286
chromosome_04	97615222	A	AAGAT	BL6	5	AGAT	NC_000070.7:100305515
chromosome_04	98530307	T	TTTTA	BL6	5	TTTA	NC_000070.7:101218298
chromosome_04	101671851	GC	G	BL6	3		NC_000070.7:104354944
chromosome_04	111309234	GTAAA	G	BL6	4	TAAA	NC_000070.7:113983941
chromosome_04	113702415	AGCGCTCACTGGAGGCCGGCCCAGCTGGGTGGGTTAGTGTTG	A	BL6	5	CTGGGTGGGTTGGTGTTGGCGCTCACTGGAGGCCGGCCCAG	NC_000070.7:116375520
chromosome_04	118760204	C	CCTAT	BL6	5	CTAT	NC_000070.7:121295779
chromosome_04	121574101	TTGTA	T	BL6	2	TCCTTCCTTTCTTCCC	NC_000070.7:124101914
chromosome_04	121867850	T	TACATAC	BL6	5	ACATAC	NC_000070.7:124395420
chromosome_04	128588101	CTCTA	C	BL6	3	ATCTCT	NC_000070.7:131100449
chromosome_04	129513327	A	AATAG	BL6	5	ATAG	NC_000070.7:132024835
chromosome_04	132844769	T	TTTCC	BL6	5	TCCTTCCT	NC_000070.7:135352859
chromosome_04	133243830	GGATA	G	BL6	5	ATAG	NC_000070.7:135751432
chromosome_04	137712079	A	AAGAT	BL6	5	AGAT	NC_000070.7:140214582
chromosome_05	2324856	GTCTA	G	BL6	3	TCTA	NC_000071.7:4995581
chromosome_05	13919172	TGATA	T	BL6	2	GATA	NC_000071.7:16581964
chromosome_05	13920168	T	TGATA	BL6	4	GATA	NC_000071.7:16582956
chromosome_05	15935283	C	CAAGG	BL6	4	AAGG	NC_000071.7:18597339
chromosome_05	20832334	TATA	T	BL6	2	ATA	NC_000071.7:23489124
chromosome_05	21844449	TTAGA	T	BL6	5	GATA	NC_000071.7:24499281
chromosome_05	24091546	G	GGTGT	BL6	4	GT	NC_000071.7:26637304
chromosome_05	31772717	T	TTAAA	BL6	2	TAAA	NC_000071.7:34313473
chromosome_05	42418784	C	CTATTAT	BL6	5	TAT	NC_000071.7:44954950
chromosome_05	52596483	TAAATA	T	BL6	3	AAAAT	NC_000071.7:55123708
chromosome_05	55419814	TTTCCTTCCTTCC	T	BL6	5	TTCC	NC_000071.7:57946760
chromosome_05	55539691	TTATC	T	BL6	4	TATC	NC_000071.7:58066633
chromosome_05	62938747	C	CACAT	BL6	2	ACAT	NC_000071.7:65469985
chromosome_05	68078806	AAAAGG	A	BL6	4	AAAGG	NC_000071.7:70601952
chromosome_05	77813475	C	CAGAT	BL6	3	AGAT	NC_000071.7:79803983
chromosome_05	78893899	A	AAGATAGAT	BL6	2	AGAT	NC_000071.7:80884363
chromosome_05	79059187	T	TTTCCC	BL6	3	TTCCC	NC_000071.7:81049650
chromosome_05	90641090	C	CA	BL6	2
chromosome_05	90980741	GTCTA	G	BL6	2	CTAT	NC_000071.7:92966594
chromosome_05	91241906	C	CATCT	BL6	3	TATC	NC_000071.7:93227263
chromosome_05	96226781	C	CATCT	BL6	4	ATCT	NC_000071.7:96539665
chromosome_05	100606864	T	TACAC	BL6	2	AC	NC_000071.7:100915600
chromosome_05	104181437	A	ACACAG	BL6	2	CAGCA
chromosome_05	105489434	A	AAGAT	BL6	5	AAT	NC_000071.7:105786109
chromosome_05	107552481	C	CTTATT	BL6	5	TTATT	NC_000071.7:107848137
chromosome_05	109533031	G	GAC	BL6	5	AC	NC_000071.7:109828177
chromosome_05	115858059	C	CTCCT	BL6	5	CTTC	NC_000071.7:116149488
chromosome_05	116500982	GTCTA	G	BL6	4	CTAT	NC_000071.7:116791791
chromosome_05	119085060	G	GAAAAGA	BL6	3	AAAGAA	NC_000071.7:119373228
chromosome_05	119201349	G	GGATA	BL6	2	ATAG	NC_000071.7:119489512
chromosome_05	120912331	G	GGATA	BL6	3	ATAG	NC_000071.7:121198906
chromosome_05	131718454	A	AATAG	BL6	3	ATAG	NC_000071.7:131994064
chromosome_05	135574308	CATTATT	C	BL6	2	ATT	NC_000071.7:135844530
chromosome_05	137040875	T	TGGAA	BL6	2	GGAA	NC_000071.7:137309467
chromosome_05	138382926	C	CATAA	BL6	3	ATAA	NC_000071.7:138650986
chromosome_05	139605402	TATAATA	T	BL6	4	ATA	NC_000071.7:139873076
chromosome_05	139813217	A	AAAAT	BL6	4	AAAT	NC_000071.7:140080885
chromosome_05	140567252	T	TTATC	BL6	2	TATC	NC_000071.7:140833949
chromosome_06	3414762	TGATA	T	BL6	2	ATAG	NC_000072.7:5948211
chromosome_06	6604055	G	GTCTA	BL6	3	TCTA	NC_000072.7:9136140
chromosome_06	10799900	GC	G	BL6	2		NC_000072.7:13329647
chromosome_06	14392965	C	CAGAT	BL6	3	AGAT	NC_000072.7:16920720
chromosome_06	19522883	C	CTTTTA	BL6	3	TTTTA	NC_000072.7:22044374
chromosome_06	25208741	C	CATTATT	BL6	2	ATT	NC_000072.7:27717984
chromosome_06	27892705	A	AAACAAC	BL6	3	AAC	NC_000072.7:30389323
chromosome_06	30077711	AAAT	A	BL6	2	AAT	NC_000072.7:32573076
chromosome_06	39562004	AG	A	BL6	4		NC_000072.7:42052353
chromosome_06	44497362	A	AAGAT	BL6	5	ATAG	NC_000072.7:46986002
chromosome_06	47115812	C	CTCTA	BL6	4	TCTA	NC_000072.7:49220284
chromosome_06	48915555	G	GAGAT	BL6	2	ATAG	NC_000072.7:51018566
chromosome_06	59632130	G	GTAGA	BL6	5	ATAG	NC_000072.7:61726442
chromosome_06	65164468	A	ATATC	BL6	4	TATC	NC_000072.7:67260221
chromosome_06	81528091	TCTTC	T	BL6	4	CCTT	NC_000072.7:83616954
chromosome_06	84161725	ACACGCACG	A	BL6	4	CACG	NC_000072.7:86248694
chromosome_06	84374608	GTGTT	G	BL6	5	TGTT	NC_000072.7:86458424
chromosome_06	91476846	TCATATA	T	BL6	3	CATATA	NC_000072.7:93547188
chromosome_06	93574330	CAAAT	C	BL6	4	AAAT	NC_000072.7:95643721
chromosome_06	98249580	T	TTATC	BL6	2	ATCT	NC_000072.7:100317218
chromosome_06	100687654	A	ATATC	BL6	5	TATC	NC_000072.7:102753815
chromosome_06	109214556	G	GGTTT	BL6	3	GTTT	NC_000072.7:111272822
chromosome_06	109278578	T	TGATA	BL6	5	GATA	NC_000072.7:111336835
chromosome_06	110677559	C	CTCTA	BL6	3	TCTG	NC_000072.7:112735250
chromosome_06	116604082	C	CTCTA	BL6	4	TATATCTATATCTA	NC_000072.7:118662129
chromosome_06	123138047	C	CTTTTG	BL6	3	TTTTG	NC_000072.7:125184859
chromosome_06	124302163	TCTCCTCCTCCTCCTCCTCCTCCTC	T	BL6	3	CTC	NC_000072.7:126347647
chromosome_06	132790846	TAATA	T	BL6	2	AATA	NC_000072.7:134832567
chromosome_06	136091974	C	CATCT	BL6	2	ATCT	NC_000072.7:138125177
chromosome_06	137508548	GAATA	G	BL6	2	TAAA	NC_000072.7:139539421
chromosome_06	141812856	AGAG	A	BL6	3	AGGAAG	NC_000072.7:143836717
chromosome_06	142890319	AACAT	A	BL6	4	ACATGCACACCCACATACATACAT	NC_000072.7:144912071
chromosome_06	145753926	G	GGATA	BL6	5	ATAG	NC_000072.7:147772147
chromosome_07	2980550	T	TGATA	BL6	5	AGAT	NC_000073.7:5936215
chromosome_07	8975988	AAAGG	A	BL6	4	AAGG	NC_000073.7:11905579
chromosome_07	27561499	TTTCTC	T	BL6	3	TTCTC	NC_000073.7:30638516
chromosome_07	35864783	G	GTCTA	BL6	2	ATCT	NC_000073.7:38867576
chromosome_07	37298212	G	GGATA	BL6	5	GATA	NC_000073.7:40298627
chromosome_07	47117031	G	GTAGA	BL6	3	GATA	NC_000073.7:50027317
chromosome_07	54738258	TTATC	T	BL6	2	TATC	NC_000073.7:57630082
chromosome_07	69133663	G	GAT	BL6	3	AT	NC_000073.7:71837396
chromosome_07	71657874	C	CATAA	BL6	5	ATAA	NC_000073.7:74354582
chromosome_07	72573455	A	ACCTT	BL6	2	CCTT	NC_000073.7:75269049
chromosome_07	72631236	G	GCT	BL6	5	CT	NC_000073.7:75326828
chromosome_07	81770210	A	AAAAT	BL6	3	AAAT	NC_000073.7:84459587
chromosome_07	82309953	A	AT	BL6	4		NC_000073.7:84999321
chromosome_07	84945028	AAGAT	A	BL6	2	AGAT	NC_000073.7:87634144
chromosome_07	85283135	C	CTGAT	BL6	2	TGAT	NC_000073.7:87972207
chromosome_07	86305751	TTATC	T	BL6	4	TATC	NC_000073.7:88994624
chromosome_07	95756229	G	GGATA	BL6	4	GATA	NC_000073.7:98435368
chromosome_07	104468227	TCTGCCACTGCAGCACTGGGATGCAG	T	BL6	2	CTGCCACTGCAGCACTGGGATGCAG	NC_000073.7:107095397
chromosome_07	106967432	T	TTATC	BL6	3	TATC	NC_000073.7:109593613
chromosome_07	112889414	G	GTAGA	BL6	5	ATAG	NC_000073.7:115508438
chromosome_07	113658427	G	GTCTA	BL6	2	TCTA	NC_000073.7:116277084
chromosome_07	122107719	G	GGATA	BL6	5	TAGA	NC_000073.7:124716939
chromosome_07	126072548	T	TCTTC	BL6	5	TTCC	NC_000073.7:128676920
chromosome_07	126256364	T	TAACC	BL6	4	AACC	NC_000073.7:128860720
chromosome_07	126859448	ATCTGTG	A	BL6	5	TCTGTG	NC_000073.7:129463777
chromosome_07	131878256	T	TACAC	BL6	2	AC	NC_000073.7:134471823
chromosome_08	841631	TTCTA	T	BL6	3	TCTA	NC_000074.7:3741832
chromosome_08	1041537	TTATC	T	BL6	2	ATCT	NC_000074.7:3941741
chromosome_08	3429677	G	GTCTA	BL6	5	CTAT
chromosome_08	13126191	CCTAT	C	BL6	2	CTAT	NC_000074.7:16008165
chromosome_08	22089397	A	AGAAG	BL6	5	GAAG	NC_000074.7:23594156
chromosome_08	26651216	C	CCTAT	BL6	2	TCCT	NC_000074.7:28150390
chromosome_08	27463929	C	CATAG	BL6	2	ATAG	NC_000074.7:28962713
chromosome_08	31484355	A	AT	BL6	5		NC_000074.7:32979729
chromosome_08	31672231	AAAAT	A	BL6	3	AAAT	NC_000074.7:33167604
chromosome_08	33327016	TTCTA	T	BL6	2	TCTA	NC_000074.7:34822038
chromosome_08	34545673	TGCACA	T	BL6	3	CACAG	NC_000074.7:36040175
chromosome_08	35479727	T	TATAG	BL6	4	ATAG	NC_000074.7:36973925
chromosome_08	36267636	C	CTCTA	BL6	3	TCTA	NC_000074.7:37761635
chromosome_08	38310586	GCAAACAGGTGCTTCAAA	G	BL6	4		NC_000074.7:39803606
chromosome_08	39325384	G	GTAGA	BL6	3	TAGG	NC_000074.7:40816911
chromosome_08	40829347	C	CTCTA	BL6	2	TCTA	NC_000074.7:42320677
chromosome_08	49293992	TAGAGAC	T	BL6	2	AGATAG	NC_000074.7:50755679
chromosome_08	50619369	GA	G	BL6	3		NC_000074.7:52080754
chromosome_08	52321003	G	GGATA	BL6	2	ATAG	NC_000074.7:53782605
chromosome_08	53027813	TG	T	BL6	2		NC_000074.7:54489369
chromosome_08	60720331	T	TTATC	BL6	3	TATC	NC_000074.7:62189465
chromosome_08	72178294	C	CCTAT	BL6	4	CTAT	NC_000074.7:73646830
chromosome_08	77081645	T	TTATC	BL6	4	CTAT	NC_000074.7:78548006
chromosome_08	79272702	G	GAGGA	BL6	3	GAAG	NC_000074.7:80737600
chromosome_08	81922782	GAGAT	G	BL6	4	AGAT	NC_000074.7:83385977
chromosome_08	87091367	T	TGACA	BL6	3	GACA	NC_000074.7:88550944
chromosome_08	94547832	C	CTATT	BL6	3	TATT	NC_000074.7:96000895
chromosome_08	95543440	T	TATAC	BL6	3	ATAC	NC_000074.7:96996590
chromosome_08	97493646	A	AT	BL6	5		NC_000074.7:98946210
chromosome_08	99109920	GA	G	BL6	3		NC_000074.7:100561560
chromosome_08	100080422	A	AATAT	BL6	2	AT	NC_000074.7:101531797
chromosome_08	101235097	C	CAGAT	BL6	4	AGAT	NC_000074.7:102686321
chromosome_08	106977617	A	ATTAT	BL6	2	TTAT	NC_000074.7:108426920
chromosome_08	107903099	G	GGATA	BL6	3	GATA	NC_000074.7:109352186
chromosome_08	109162434	GTAGATAGA	G	BL6	4	GATA	NC_000074.7:110611046
chromosome_08	110266432	GCTAA	G	BL6	4		NC_000074.7:111713704
chromosome_08	123961945	T	TTTTA	BL6	4	TTTA	NC_000074.7:125349575
chromosome_08	125550705	GGACGGTGGACTCTGTACGCA	G	BL6	2		NC_000074.7:126936799
chromosome_08	126210911	T	TGATA	BL6	4	AGAT	NC_000074.7:127596985
chromosome_09	1367421	CATAG	C	BL6	5	GATA	NC_000075.7:4116627
chromosome_09	7876600	A	AGAAG	BL6	3	AGGA	NC_000075.7:10624089
chromosome_09	25196957	AAAAGG	A	BL6	4	AAAAG	NC_000075.7:27933641
chromosome_09	28193396	A	AAAAAC	BL6	5	AACAA	NC_000075.7:30920693
chromosome_09	31587745	A	AT	BL6	4		NC_000075.7:34312480
chromosome_09	36425731	T	TGATA	BL6	4	ATAG	NC_000075.7:39146759
chromosome_09	40593857	G	GTCTA	BL6	5	ATCT	NC_000075.7:43306963
chromosome_09	42214479	C	CATCT	BL6	5	ATCT	NC_000075.7:44926880
chromosome_09	43507203	GCTGAATGGCATCCCC	G	BL6	2		NC_000075.7:46220120
chromosome_09	43574999	A	AAAACC	BL6	4	AAACC	NC_000075.7:46287871
chromosome_09	45475575	CAGAT	C	BL6	2	AGAT	NC_000075.7:48185282
chromosome_09	53292217	TC	T	BL6	3	TTTC	NC_000075.7:55990602
chromosome_09	54046686	A	AATAG	BL6	4	ATAG	NC_000075.7:56744970
chromosome_09	62199370	G	GT	BL6	4		NC_000075.7:64889389
chromosome_09	62505606	G	GTCTA	BL6	4	TCTA	NC_000075.7:65195308
chromosome_09	68092684	ATATC	A	BL6	4	TATC	NC_000075.7:70777173
chromosome_09	69606314	G	GGGAAAGGAAA	BL6	3	AAGGG	NC_000075.7:72290475
chromosome_09	74926425	G	GTAATAA	BL6	5	TAA	NC_000075.7:77601283
chromosome_09	75931270	G	GTATC	BL6	5	ATCT	NC_000075.7:78604167
chromosome_09	75948801	AGT	A	BL6	5		NC_000075.7:78621698
chromosome_09	80322148	TAGTC	T	BL6	3		NC_000075.7:82992039
chromosome_09	82585197	A	AAGAT	BL6	3	AAAGAAAGGAAG	NC_000075.7:85253745
chromosome_09	85814196	C	CCCAACGGT	BL6	2	CGCC	NC_000075.7:88481685
chromosome_09	86104775	GGGGAGATATAAAAACAA	G	BL6	3	GGGAGATATAAAAACAA	NC_000075.7:88772252
chromosome_09	89058072	TATAA	T	BL6	4	AATA	NC_000075.7:91725348
chromosome_09	91842920	A	AATAG	BL6	3	ATAG	NC_000075.7:94509702
chromosome_09	93853951	T	TGAGAA	BL6	4	GAAGA	NC_000075.7:96518431
chromosome_09	96492257	CAAACA	C	BL6	4	AACAA	NC_000075.7:99156005
chromosome_09	101852040	CCTAT	C	BL6	4	CTAT	NC_000075.7:104509648
chromosome_09	102516586	A	AATAG	BL6	4	AGAT	NC_000075.7:105173894
chromosome_09	107230406	C	CATTT	BL6	2	ATTT	NC_000075.7:109878841
chromosome_09	109698102	TATAG	T	BL6	5	ATAG	NC_000075.7:112344777
chromosome_09	109723771	C	CATTT	BL6	3	ATTT	NC_000075.7:112370442
chromosome_09	111969839	T	TTTTTA	BL6	2	TTTTA	NC_000075.7:114615289
chromosome_09	119223661	TAATA	T	BL6	3	AATA	NC_000075.7:121840166
chromosome_10	492259	A	AGTGT	BL6	2	GT	NC_000076.7:3475907
chromosome_10	8268705	ATCTGTC	A	BL6	2	TCTGTC	NC_000076.7:11242666
chromosome_10	8341713	T	TTTTA	BL6	5	TTTA	NC_000076.7:11315673
chromosome_10	12036481	ATATC	A	BL6	3	TATC	NC_000076.7:15006692
chromosome_10	17357820	AAG	A	BL6	4		NC_000076.7:20321638
chromosome_10	22630665	G	GTCTA	BL6	3	TATC	NC_000076.7:25588000
chromosome_10	22959587	ATATC	A	BL6	3	TCTA	NC_000076.7:25916837
chromosome_10	27588455	GGTGT	G	BL6	3	GT	NC_000076.7:30544146
chromosome_10	27599017	C	CCTAT	BL6	5	CTATCTGC	NC_000076.7:30554708
chromosome_10	31175154	C	CAAAT	BL6	5	AAAT	NC_000076.7:34129232
chromosome_10	31635752	A	AT	BL6	4		NC_000076.7:34588946
chromosome_10	33025316	C	CT	BL6	2		NC_000076.7:35970599
chromosome_10	41180057	GAGACAC	G	BL6	2	AG	NC_000076.7:44118319
chromosome_10	42164973	AG	A	BL6	4		NC_000076.7:45102738
chromosome_10	42997441	A	AAAAT	BL6	4	AAAT	NC_000076.7:45935177
chromosome_10	49403741	C	CATCT	BL6	5	TCTA	NC_000076.7:52339758
chromosome_10	55231894	TCTTCCTTC	T	BL6	3	TCTT	NC_000076.7:58164296
chromosome_10	62606103	A	AAGAT	BL6	2	ATAG	NC_000076.7:65532942
chromosome_10	65245726	G	GCTTC	BL6	5	TTGC	NC_000076.7:68172032
chromosome_10	71462938	T	TTAGA	BL6	5	TAGA	NC_000076.7:74387009
chromosome_10	71729861	G	GAATAT	BL6	3	AATAT	NC_000076.7:74653921
chromosome_10	74245146	G	GATCT	BL6	2	ATCT	NC_000076.7:77168064
chromosome_10	80453363	A	AATCT	BL6	3	ATCT	NC_000076.7:83372172
chromosome_10	86031455	A	AAGAT	BL6	5	AGAT	NC_000076.7:88944326
chromosome_10	89121102	CCATA	C	BL6	4	TACACACACACA	NC_000076.7:92033549
chromosome_10	91802636	CGTATAT	C	BL6	4	GTATAT	NC_000076.7:94713711
chromosome_10	92409582	T	TGATA	BL6	5	GATA	NC_000076.7:95320046
chromosome_10	94863694	G	GATAA	BL6	3	AAAT	NC_000076.7:97772598
chromosome_10	95909792	G	GACAC	BL6	3	AC	NC_000076.7:98817997
chromosome_10	96535936	T	TTATC	BL6	5	TATC	NC_000076.7:99443799
chromosome_10	98418235	ACAAT	A	BL6	3	CAAT	NC_000076.7:101338255
chromosome_10	99611500	TTTAA	T	BL6	5	TTAA	NC_000076.7:102530771
chromosome_10	100524033	G	GTTAT	BL6	5	TTAT	NC_000076.7:103443092
chromosome_10	105013778	TATAG	T	BL6	4	ATAG	NC_000076.7:107922770
chromosome_10	107869642	TA	T	BL6	4		NC_000076.7:110776911
chromosome_10	109849113	AT	A	BL6	3		NC_000076.7:112753999
chromosome_10	111257809	A	AAAAAC	BL6	2	AAAAC	NC_000076.7:114162569
chromosome_10	111759500	G	GAGAT	BL6	2	AGAT	NC_000076.7:114664244
chromosome_10	119781054	C	CTCCT	BL6	3	TCCT	NC_000076.7:122677708
chromosome_10	121074630	GTATC	G	BL6	2	TATC	NC_000076.7:123970794
chromosome_11	6529284	ATCCT	A	BL6	4	TCCT	NC_000077.7:9480737
chromosome_11	16401435	G	GTCTT	BL6	3	TCTT	NC_000077.7:19337203
chromosome_11	19013753	C	CAGA	BL6	2		NC_000077.7:21945864
chromosome_11	29720950	A	AGTGT	BL6	5	GT	NC_000077.7:32681802
chromosome_11	32676035	AAG	A	BL6	3		NC_000077.7:35625002
chromosome_11	33804843	A	ATATC	BL6	2	TATC	NC_000077.7:36750004
chromosome_11	34030311	G	GTCTA	BL6	2	ATATGTCTGTCTGTCTATCTATCA	NC_000077.7:36975460
chromosome_11	34864469	T	TGAAA	BL6	2	GAAA	NC_000077.7:37808955
chromosome_11	36052854	C	CATCT	BL6	4	CTAT	NC_000077.7:38997072
chromosome_11	37614230	T	TTAAA	BL6	5	TAAA	NC_000077.7:40558181
chromosome_11	40798417	T	TTATC	BL6	2	TCTA	NC_000077.7:43737685
chromosome_11	41548095	C	CATAA	BL6	4	ATAA	NC_000077.7:44486252
chromosome_11	41981980	GACAGTAGGGGTGACTTGATA	G	BL6	2		NC_000077.7:44920114
chromosome_11	46506509	G	GAGAT	BL6	3	TAGA	NC_000077.7:49441811
chromosome_11	48489255	C	CGATA	BL6	2	GATA	NC_000077.7:51423374
chromosome_11	52208967	C	CCTTTT	BL6	5	CTTTT	NC_000077.7:55139566
chromosome_11	63217075	G	GTAGA	BL6	4	TAGA	NC_000077.7:66143470
chromosome_11	69095991	C	CT	BL6	2		NC_000077.7:72019440
chromosome_11	71069828	T	TGATA	BL6	3	GATA	NC_000077.7:73993065
chromosome_11	72046873	C	CGT	BL6	2		NC_000077.7:74970026
chromosome_11	78099370	C	CATCT	BL6	2	ATCT	NC_000077.7:81016416
chromosome_11	81364197	AATAG	A	BL6	4	ATAG	NC_000077.7:84278533
chromosome_11	85025763	AGTCCGCGCTTTTCGTC	A	BL6	2		NC_000077.7:87938633
chromosome_11	87794288	A	ATTAT	BL6	3	TTTA	NC_000077.7:90673172
chromosome_11	90739949	G	GGATA	BL6	3	ATAG	NC_000077.7:93615770
chromosome_11	98750428	A	AAAGG	BL6	5	AAGG	NC_000077.7:101622550
chromosome_11	101989955	T	TTAGA	BL6	4	ATAG	NC_000077.7:104859033
chromosome_11	105617503	T	TGATA	BL6	5	GATA	NC_000077.7:108492058
chromosome_12	1791275	TCTCTC	T	BL6	4	CCTCT	NC_000078.7:4696903
chromosome_12	7104627	T	TTCTA	BL6	5	TCTA	NC_000078.7:9999680
chromosome_12	14178625	T	TTATC	BL6	4	ATCT	NC_000078.7:17066529
chromosome_12	16442118	CTCTA	C	BL6	5	TCTA	NC_000078.7:19325449
chromosome_12	21978547	AGCTCAATTAGCGT	A	BL6	2		NC_000078.7:24858982
chromosome_12	21979200	C	CCTAT	BL6	5	CTAT	NC_000078.7:24859635
chromosome_12	26253852	C	CATCT	BL6	2	ATCT	NC_000078.7:29131140
chromosome_12	27238649	G	GATCT	BL6	2	ATCT	NC_000078.7:30114539
chromosome_12	29029947	GATTT	G	BL6	5	ATTT	NC_000078.7:31903774
chromosome_12	32837248	TACACAC	T	BL6	4	AC	NC_000078.7:35708344
chromosome_12	45999626	G	GTATC	BL6	2	ATCT	NC_000078.7:48841524
chromosome_12	51877916	CCTCA	C	BL6	2		NC_000078.7:54716736
chromosome_12	53212768	CTCTA	C	BL6	2	TCTA	NC_000078.7:56125631
chromosome_12	56658330	C	CGTGT	BL6	3	GT	NC_000078.7:59569901
chromosome_12	62350290	C	CA	BL6	4
chromosome_12	63174666	AATAG	A	BL6	5	TAGA	NC_000078.7:66075971
chromosome_12	65612301	G	GTAGATA	BL6	3	TAGATA	NC_000078.7:68512389
chromosome_12	65992591	TATAG	T	BL6	4	TATAGATA	NC_000078.7:68892063
chromosome_12	66262021	T	TATAG	BL6	5	ATAG	NC_000078.7:69161481
chromosome_12	69982188	GTAAAA	G	BL6	2		NC_000078.7:72873453
chromosome_12	72501134	T	TATAG	BL6	5	ATAG	NC_000078.7:75390623
chromosome_12	77372993	T	TAGGAA	BL6	3	AGGAA	NC_000078.7:80261428
chromosome_12	78052818	CATTT	C	BL6	3	ATTT	NC_000078.7:80941246
chromosome_12	78290362	GAATAT	G	BL6	3	AATAT	NC_000078.7:81178672
chromosome_12	78505723	G	GTTGTT	BL6	2	TTGTT	NC_000078.7:81394030
chromosome_12	78747030	G	GAAAT	BL6	2	AAAT	NC_000078.7:81635337
chromosome_12	82245113	AAATAG	A	BL6	2	AGAAT	NC_000078.7:85128035
chromosome_12	83789431	AGTGTGT	A	BL6	4	GTGT	NC_000078.7:86672080
chromosome_12	86345434	C	CATCT	BL6	4	TCTA	NC_000078.7:89176779
chromosome_12	92234837	AT	A	BL6	3		NC_000078.7:95061648
chromosome_12	97182145	T	TATAG	BL6	4	ATAG	NC_000078.7:100005528
chromosome_12	113014875	T	TATAA	BL6	4	ATAA	NC_000078.7:115782197
chromosome_12	113425681	AATAG	A	BL6	4	ATAG	NC_000078.7:116192712
chromosome_13	2074240	CAATA	C	BL6	3	AATA	NC_000079.7:4403324
chromosome_13	3445056	A	AGTAT	BL6	3	TGTA	NC_000079.7:5773398
chromosome_13	5339494	T	TTTCTC	BL6	5	TTCTCTTCTTTTCTC	NC_000079.7:7666776
chromosome_13	9296190	A	AGTAT	BL6	2	GTAT	NC_000079.7:11621697
chromosome_13	13235154	T	TATAG	BL6	2	ATAG	NC_000079.7:15551954
chromosome_13	17651979	GA	G	BL6	5		NC_000079.7:19967759
chromosome_13	33075592	T	TTCTA	BL6	5	TCTA	NC_000079.7:35380286
chromosome_13	33239753	GTAGA	G	BL6	3	AGAT	NC_000079.7:35544443
chromosome_13	38036342	T	TGATA	BL6	5	GATA	NC_000079.7:40332888
chromosome_13	38134067	A	ACAGG	BL6	3	GCAG	NC_000079.7:40430597
chromosome_13	39195108	GCACACACA	G	BL6	2	CA	NC_000079.7:41490780
chromosome_13	43954193	G	GAGAT	BL6	5	AGAT	NC_000079.7:46247269
chromosome_13	49692502	G	GAAAGA	BL6	2	AAAAG	NC_000079.7:51982582
chromosome_13	51490692	G	GTCTA	BL6	2	TCTA	NC_000079.7:53779665
chromosome_13	54078348	CATCT	C	BL6	4	TATCTCTATCTA	NC_000079.7:56365491
chromosome_13	63327863	T	TAATA	BL6	4	AATA	NC_000079.7:65606456
chromosome_13	65125381	A	ATATC	BL6	4	TATATC	NC_000079.7:67402240
chromosome_13	67669439	GAGAT	G	BL6	3	AGAT	NC_000079.7:69944477
chromosome_13	88784445	AAGAT	A	BL6	3	GATA	NC_000079.7:91048770
chromosome_13	92262716	GTATATATATA	G	BL6	4	TA	NC_000079.7:94524028
chromosome_13	104295933	G	GTAGA	BL6	3	ATAG	NC_000079.7:106539017
chromosome_13	110749820	T	TCTTC	BL6	3	CCTT	NC_000079.7:112980930
chromosome_13	113734543	T	TCTTC	BL6	2	TTTC	NC_000079.7:115963648
chromosome_13	115237568	C	CATCT	BL6	2	CTAT	NC_000079.7:117466499
chromosome_13	116529943	CTAAA	C	BL6	5	TAAA	NC_000079.7:118758690
chromosome_13	117397449	GTTA	G	BL6	2		NC_000079.7:119625768
chromosome_13	117399760	TTAAAGAATC	T	BL6	2		NC_000079.7:119627805
chromosome_13	117403095	A	AG	BL6	2		NC_000079.7:119631140
chromosome_14	6843978	T	TATAA	BL6	2	ATAA	NC_000080.7:9664985
chromosome_14	8211774	C	CCTAT	BL6	3	ATCT	NC_000080.7:11032708
chromosome_14	19533471	T	TTCTA	BL6	2	TCTA	NC_000080.7:22668692
chromosome_14	22420617	GAAGA	G	BL6	3	GAAA	NC_000080.7:25554833
chromosome_14	25293760	A	ATAT	BL6	2	GAA	NC_000080.7:28426369
chromosome_14	25723318	TTAGA	T	BL6	5	TAGA	NC_000080.7:28855446
chromosome_14	32635156	AG	A	BL6	3		NC_000080.7:35762493
chromosome_14	32666393	G	GTATT	BL6	3	TTTTTTATTTA	NC_000080.7:35793724
chromosome_14	32810678	A	AATCT	BL6	3	ATCT	NC_000080.7:35937894
chromosome_14	44647952	G	GATTT	BL6	3	ATTT	NC_000080.7:48103633
chromosome_14	48844781	C	CAAAT	BL6	3	AAAT	NC_000080.7:52294511
chromosome_14	49246704	C	CTCTA	BL6	2	TCTA	NC_000080.7:52695868
chromosome_14	50683152	C	CAGAT	BL6	3	AGAT	NC_000080.7:54011344
chromosome_14	50913735	T	TGATA	BL6	5	ATAG	NC_000080.7:54241901
chromosome_14	55967312	T	TGATA	BL6	2	ATAG	NC_000080.7:59293536
chromosome_14	60246507	T	TTCTTC	BL6	5	TCTTC	NC_000080.7:63565066
chromosome_14	66574172	G	GTAGA	BL6	5	TAGA	NC_000080.7:69889345
chromosome_14	78763491	AGAAGGAAG	A	BL6	2	GAAG	NC_000080.7:82070781
chromosome_14	82849973	C	CAAAT	BL6	4	AAAT	NC_000080.7:86155889
chromosome_14	89150252	A	AACTC	BL6	3		NC_000080.7:92455328
chromosome_14	89969976	CACAT	C	BL6	5	ATAC	NC_000080.7:93274425
chromosome_14	91693010	CTATT	C	BL6	2	TATT	NC_000080.7:94996919
chromosome_14	92925055	A	AAGAT	BL6	5	AGAT	NC_000080.7:96229206
chromosome_14	94888050	C	CAAATA	BL6	3	AAATA	NC_000080.7:98191568
chromosome_14	97533883	C	CATCT	BL6	3	CTAT	NC_000080.7:100832951
chromosome_14	100356029	T	TTAGA	BL6	2	TAGA	NC_000080.7:103651865
chromosome_14	102524106	G	GTAGA	BL6	5	TAGA	NC_000080.7:105818917
chromosome_14	104124146	G	GATGTAT	BL6	2	TATATG	NC_000080.7:107418679
chromosome_14	105792948	ATATC	A	BL6	4	TATC	NC_000080.7:109087163
chromosome_14	111963963	T	TTAGA	BL6	2	TAGA	NC_000080.7:115246011
chromosome_14	113651876	G	GGATA	BL6	5	AGAT	NC_000080.7:116933964
chromosome_14	121085993	C	CATTT	BL6	3	ATTT	NC_000080.7:124362733
chromosome_15	746792	A	AT	BL6	4		NC_000081.7:3181613
chromosome_15	2916308	TTATC	T	BL6	4	TATC	NC_000081.7:5340620
chromosome_15	5077157	A	AATAG	BL6	2	ATAG	NC_000081.7:7500771
chromosome_15	6479248	AAAATAAATAAAT	A	BL6	4	AAAT	NC_000081.7:8902246
chromosome_15	10660966	C	CATTT	BL6	4	ATTT	NC_000081.7:13063973
chromosome_15	19084030	A	ATG	BL6	3	TG	NC_000081.7:21482897
chromosome_15	26577924	TAC	T	BL6	4	AC	NC_000081.7:28936034
chromosome_15	39838320	C	CAATA	BL6	5	AATA	NC_000081.7:42187714
chromosome_15	41503852	A	ATATC	BL6	2	TATC	NC_000081.7:43853127
chromosome_15	45333288	A	AAT	BL6	4	AT	NC_000081.7:47674624
chromosome_15	51622293	G	GGTTT	BL6	4	GTTT	NC_000081.7:53961672
chromosome_15	57412713	A	ACCAT	BL6	5	ATCC	NC_000081.7:59747085
chromosome_15	61670071	CATTATT	C	BL6	5	ATT	NC_000081.7:63998665
chromosome_15	65414179	G	GTAGA	BL6	3	AGAT	NC_000081.7:67735681
chromosome_15	80428771	G	GAGGA	BL6	5	GGAA	NC_000081.7:82729989
chromosome_15	81089869	TGAGAG	T	BL6	5	GAGAG	NC_000081.7:83391063
chromosome_15	92368142	T	TTTA	BL6	2	TTA	NC_000081.7:94657034
chromosome_15	94588305	G	GCAGA	BL6	3	CAGA	NC_000081.7:96874369
chromosome_15	96757891	TTCTTC	T	BL6	4	CTTCT	NC_000081.7:99041957
chromosome_16	18930223	A	ATATT	BL6	3	TATT	NC_000082.7:21595126
chromosome_16	22447046	G	GTATC	BL6	2	TATC	NC_000082.7:25110703
chromosome_16	25213857	GGAGAA	G	BL6	3	GAGAA	NC_000082.7:27876299
chromosome_16	27687954	CAAAAT	C	BL6	4	AAAAT	NC_000082.7:30349304
chromosome_16	34531073	A	AAGAT	BL6	3	AGAT	NC_000082.7:37189039
chromosome_16	35164129	TG	T	BL6	4		NC_000082.7:37821939
chromosome_16	35798065	G	GATTT	BL6	2	ATTT	NC_000082.7:38455805
chromosome_16	36535632	ATATC	A	BL6	4	TATC	NC_000082.7:39193244
chromosome_16	38859452	G	GTCTA	BL6	3	TCTA	NC_000082.7:41516398
chromosome_16	41925235	T	TTATC	BL6	3	TATC	NC_000082.7:44579951
chromosome_16	42375052	CCCTT	C	BL6	4	CCTT	NC_000082.7:45029564
chromosome_16	49633786	T	TCTTC	BL6	4	TCCT	NC_000082.7:52280294
chromosome_16	58022782	G	GGATA	BL6	2	GATA	NC_000082.7:60660016
chromosome_16	60958404	ACT	A	BL6	4		NC_000082.7:63594566
chromosome_16	66124176	CTA	C	BL6	5	TATATC	NC_000082.7:68756319
chromosome_16	71569140	T	TTAGA	BL6	3	TAGA	NC_000082.7:74199393
chromosome_16	71573728	T	TTAGA	BL6	4	TAGA	NC_000082.7:74203981
chromosome_16	73700856	T	TTTTA	BL6	2	TTTA	NC_000082.7:76330361
chromosome_16	79560429	T	TAC	BL6	3	AC	NC_000082.7:82185978
chromosome_16	81335619	G	GAGAT	BL6	3	AGAT	NC_000082.7:83960873
chromosome_16	85243614	CATCT	C	BL6	3	ATCT	NC_000082.7:87856921
chromosome_16	90829000	T	TATATC	BL6	5	ATATC	NC_000082.7:93433184
chromosome_16	92247712	TTATC	T	BL6	4	TCTA	NC_000082.7:94850026
chromosome_16	94660279	TATAG	T	BL6	4	ATAG	NC_000082.7:97260452
chromosome_17	6013148	CCTAT	C	BL6	4	ATCT	NC_000083.7:7782622
chromosome_17	8952935	T	TTCTTC	BL6	5	TCTTC	NC_000083.7:10712003
chromosome_17	14324844	A	AGT	BL6	5	TG	NC_000083.7:15637780
chromosome_17	14756988	T	TTATC	BL6	3	TATC	NC_000083.7:16070552
chromosome_17	19132729	CTCTA	C	BL6	4	TCTA	NC_000083.7:20443088
chromosome_17	24083952	T	TTAAA	BL6	5	TAAA	NC_000083.7:25393561
chromosome_17	28040408	T	TCATG	BL6	4		NC_000083.7:29330412
chromosome_17	37475482	A	ATATATG	BL6	5	ATATAT	NC_000083.7:38808262
chromosome_17	38235818	C	CAT	BL6	3	AT	NC_000083.7:39568529
chromosome_17	41699528	C	CGATA	BL6	5	GATA	NC_000083.7:43031565
chromosome_17	50419123	T	TA	BL6	3	A	NC_000083.7:51740669
chromosome_17	53069044	G	GCA	BL6	4	CA	NC_000083.7:54389431
chromosome_17	56059142	C	CATT	BL6	4	ATT	NC_000083.7:57378375
chromosome_17	61306981	G	GTAGA	BL6	3	TAGA	NC_000083.7:62624860
chromosome_17	65177831	T	TCTTC	BL6	5	CTTC	NC_000083.7:66493859
chromosome_17	69075897	G	GT	BL6	2		NC_000083.7:70387288
chromosome_17	69576128	CAGAT	C	BL6	5	AGAT	NC_000083.7:70886619
chromosome_17	77551632	TTTTGG	T	BL6	4	TTTGG	NC_000083.7:78855154
chromosome_17	82489730	TAATA	T	BL6	2	AATA	NC_000083.7:83788784
chromosome_17	84902480	C	CATCT	BL6	3	ATCT	NC_000083.7:86195831
chromosome_17	87049069	AG	A	BL6	5		NC_000083.7:88337405
chromosome_17	88031315	GT	G	BL6	4		NC_000083.7:89317485
chromosome_17	89805819	GTCTA	G	BL6	4	TCTA	NC_000083.7:91091948
chromosome_17	90040091	CATCT	C	BL6	3	TCTA	NC_000083.7:91326138
chromosome_18	5183901	AAAAT	A	BL6	2	AAAT	NC_000084.7:7575711
chromosome_18	6317415	C	CAGAT	BL6	3	ATAG	NC_000084.7:8707452
chromosome_18	8866290	GTCTA	G	BL6	4	TATC	NC_000084.7:11255774
chromosome_18	19594016	T	TTCTA	BL6	4	TCTA	NC_000084.7:21971314
chromosome_18	22063791	A	AATAG	BL6	4	AGAT	NC_000084.7:24439272
chromosome_18	22852551	TG	T	BL6	2		NC_000084.7:25227703
chromosome_18	27274721	T	TGATA	BL6	4	TAGA	NC_000084.7:29648948
chromosome_18	37776455	G	GGATA	BL6	3	GATA	NC_000084.7:40123254
chromosome_18	39424799	AATAG	A	BL6	5	AATA	NC_000084.7:41770716
chromosome_18	53029137	G	GGAGACA	BL6	2	AGAGAC	NC_000084.7:55362560
chromosome_18	54003183	G	GAGAT	BL6	5	AGAT	NC_000084.7:56336649
chromosome_18	54180617	G	GATAGT	BL6	4	ATAGT	NC_000084.7:56514077
chromosome_18	54655108	AATCT	A	BL6	5	ATCT	NC_000084.7:56988546
chromosome_18	59243818	GAGATAGAT	G	BL6	4	ATAG	NC_000084.7:61574771
chromosome_18	60484978	T	TTAGA	BL6	2	ATAG	NC_000084.7:62814849
chromosome_18	68752000	CCTAT	C	BL6	4	TCTA	NC_000084.7:71072436
chromosome_18	70726571	T	TGATA	BL6	5	GATA	NC_000084.7:73045893
chromosome_18	80153239	G	GTAGA	BL6	3	GATA	NC_000084.7:82453495
chromosome_18	84990130	C	CATCT	BL6	4	TATC	NC_000084.7:87276571
chromosome_18	87234310	GATTTTCTAGATA	G	BL6	4		NC_000084.7:89519969
chromosome_19	6170624	G	GGATA	BL6	2	GATA	NC_000085.7:8607249
chromosome_19	8831808	A	ATATC	BL6	5	TATC	NC_000085.7:11266418
chromosome_19	9510933	C	CTCCT	BL6	2	TCCT	NC_000085.7:11941482
chromosome_19	17018798	T	TTTTA	BL6	5	TTTA	NC_000085.7:19446521
chromosome_19	19566302	C	CTTAT	BL6	3	TTAT	NC_000085.7:21991489
chromosome_19	26205584	GCAAAAA	G	BL6	4	CAAAAA	NC_000085.7:28624754
chromosome_19	35119845	G	GTCTA	BL6	3	ATCT	NC_000085.7:37505197
chromosome_19	35611540	G	GTAGA	BL6	5	TAGA	NC_000085.7:37995321
chromosome_19	35835994	T	TTAGA	BL6	5	TAGA	NC_000085.7:38219749
chromosome_19	43571782	C	CAGAT	BL6	2	AGAT	NC_000085.7:45916561
chromosome_19	47692047	C	CAAAT	BL6	2	AAAT	NC_000085.7:50032246
chromosome_19	51241891	C	CTCCT	BL6	4	TTCC	NC_000085.7:53575685
chromosome_19	52195241	CCT	C	BL6	3		NC_000085.7:54520722
chromosome_X	54221300	T	TTATC	BL6	2	TCTA	NC_000086.8:58451844
chromosome_X	72735993	C	CAT	BL6	5	TATATACATATACA	NC_000086.8:76934122
chromosome_X	99190269	TAATA	T	BL6	3	AATA	NC_000086.8:103228612
chromosome_X	149981257	G	GTAGA	BL6	2	GATA
chromosome_X	151313863	T	TGATA	BL6	3	GATA	NC_000086.8:157372924
chromosome_01	2284443	TG	T	C3H	2		NC_000067.7:4623765
chromosome_01	6426593	G	GGAAAA	C3H	4	AAAAG	NC_000067.7:8865053
chromosome_01	6530131	G	GAGAT	C3H	4	TAGATAGA	NC_000067.7:8971423
chromosome_01	7494142	C	CTCCT	C3H	1	TCCT	NC_000067.7:9895184
chromosome_01	7497068	AATAG	A	C3H	1	ATAG	NC_000067.7:9898103
chromosome_01	8231776	TACACACACACAC	T	C3H	4	AC
chromosome_01	8463253	TTATC	T	C3H	2	TATC	NC_000067.7:10828194
chromosome_01	9178129	C	CTCTTT	C3H	4	CTTTT	NC_000067.7:11550473
chromosome_01	9283357	T	TGATA	C3H	1	TAGA	NC_000067.7:11652523
chromosome_01	9477953	CATCT	C	C3H	1	CTAT	NC_000067.7:11859376
chromosome_01	10341504	G	GTAGA	C3H	1	TAGA	NC_000067.7:12713082
chromosome_01	10681341	TGATA	T	C3H	1	GATA	NC_000067.7:13043181
chromosome_01	11322379	GATCT	G	C3H	1	ATCTATCTATCTATCTATCTATCCATCCTGATTGCTCTTGTGTGTCAACTTTGACACAGGCTGG	NC_000067.7:13692872
chromosome_01	11427241	TG	T	C3H	3		NC_000067.7:13791992
chromosome_01	13515133	AAC	A	C3H	2	ACACACACACAC
chromosome_01	13700562	GT	G	C3H	1		NC_000067.7:16041024
chromosome_01	13754981	A	AGAAAG	C3H	1	AAGGA
chromosome_01	13838193	C	CCA	C3H	4	CA	NC_000067.7:16181687
chromosome_01	13878200	A	AACAC	C3H	3	AC	NC_000067.7:16221863
chromosome_01	14271630	GATAA	G	C3H	2	ATAA	NC_000067.7:16608333
chromosome_01	15023293	TTCTA	T	C3H	1	TCTA	NC_000067.7:17369457
chromosome_01	15473387	T	TACAC	C3H	1	AC	NC_000067.7:17819497
chromosome_01	15519331	C	CATCT	C3H	3	ATCT	NC_000067.7:17865425
chromosome_01	16403931	C	CAATA	C3H	3	AATA	NC_000067.7:18748616
chromosome_01	16975737	C	CATCT	C3H	1	TATC	NC_000067.7:19313455
chromosome_01	17427630	GAGGA	G	C3H	1	AAAG	NC_000067.7:19765101
chromosome_01	17634246	C	CATTATT	C3H	4	ATT	NC_000067.7:19977639
chromosome_01	19711487	CATCT	C	C3H	4	ATCT
chromosome_01	20596181	CCTAT	C	C3H	1	CTGC	NC_000067.7:22936909
chromosome_01	20919622	GAGGA	G	C3H	1	GGAA	NC_000067.7:23260500
chromosome_01	21193889	T	TAC	C3H	3		NC_000067.7:23545399
chromosome_01	21376121	A	AATAG	C3H	3	TAGA	NC_000067.7:23727937
chromosome_01	22442533	C	CATTT	C3H	1	ATTT	NC_000067.7:24796244
chromosome_01	22697885	C	CCTTT	C3H	1	CCTT	NC_000067.7:25045542
chromosome_01	24531039	T	TAC	C3H	4	AC	NC_000067.7:26859723
chromosome_01	25290840	G	GT	C3H	2		NC_000067.7:27608542
chromosome_01	26025096	C	CAAAT	C3H	2	AC	NC_000067.7:28335850
chromosome_01	26825289	T	TGATA	C3H	4	TAGA	NC_000067.7:29109881
chromosome_01	27646800	C	CT	C3H	3		NC_000067.7:29927990
chromosome_01	27674868	T	TGATA	C3H	1	ATAG	NC_000067.7:29955148
chromosome_01	28484384	T	TGATA	C3H	2	ATAG	NC_000067.7:30778960
chromosome_01	30515205	GTAGA	G	C3H	4	TAGA	NC_000067.7:32822405
chromosome_01	30882890	T	TGATA	C3H	4	ATAG	NC_000067.7:33188519
chromosome_01	31332685	AGAAG	A	C3H	3	GGAA	NC_000067.7:33631673
chromosome_01	32630176	TTCTA	T	C3H	1	TCTA	NC_000067.7:34938258
chromosome_01	34328931	T	TTTCC	C3H	2	TTCT
chromosome_01	35492769	AATAG	A	C3H	2	ATAG	NC_000067.7:37771066
chromosome_01	35572475	G	GAATAT	C3H	2	AATAT	NC_000067.7:37850719
chromosome_01	36136231	T	TCATA	C3H	1	CATA	NC_000067.7:38399305
chromosome_01	36317607	GACAC	G	C3H	4	AC	NC_000067.7:38580578
chromosome_01	36584849	A	AACAC	C3H	4	AC	NC_000067.7:38851478
chromosome_01	36710529	C	CATCT	C3H	3	TATC	NC_000067.7:38975413
chromosome_01	37618629	G	GTGTA	C3H	2	TATGTGTG	NC_000067.7:39866450
chromosome_01	37645100	C	CAAT	C3H	3	AAT	NC_000067.7:39892693
chromosome_01	38247188	A	ATATC	C3H	3	ATCT	NC_000067.7:40485403
chromosome_01	38809489	C	CCTAT	C3H	2	CTAT	NC_000067.7:41043441
chromosome_01	38810077	T	TATAG	C3H	1	ATAG	NC_000067.7:41044021
chromosome_01	39466725	TGATA	T	C3H	1	TAGA	NC_000067.7:41685881
chromosome_01	39597624	G	GTAGA	C3H	2	ATAG	NC_000067.7:41810567
chromosome_01	40547343	CAGAT	C	C3H	2	AGAT	NC_000067.7:42745350
chromosome_01	43483026	G	GTAGA	C3H	1	TAGA	NC_000067.7:45640550
chromosome_01	44238364	T	TCTTTC	C3H	3	CTTTT	NC_000067.7:46367920
chromosome_01	44447574	CT	C	C3H	3		NC_000067.7:46563897
chromosome_01	45012817	C	CATCT	C3H	4	CTAT	NC_000067.7:47114446
chromosome_01	45312249	A	AAAGG	C3H	4	AAGG	NC_000067.7:47432449
chromosome_01	45955751	CA	C	C3H	3		NC_000067.7:48081890
chromosome_01	46919602	A	AAAT	C3H	4	AAT	NC_000067.7:49071269
chromosome_01	51457166	A	AAAGG	C3H	3	AAGG	NC_000067.7:53611649
chromosome_01	51788737	G	GTCTA	C3H	3	ATCT	NC_000067.7:53943231
chromosome_01	54499735	G	GTAGA	C3H	4	TAGA	NC_000067.7:56647865
chromosome_01	54693294	CCCATCCAT	C	C3H	2	ATCCATCC	NC_000067.7:56841529
chromosome_01	55234203	T	TGAAA	C3H	2	GAAA	NC_000067.7:57382189
chromosome_01	55578252	C	CAAT	C3H	3	AAT	NC_000067.7:57726184
chromosome_01	57041987	T	TATAG	C3H	4	ATAG	NC_000067.7:59188385
chromosome_01	58611413	TTATC	T	C3H	4	TATC	NC_000067.7:60756919
chromosome_01	59345241	CATT	C	C3H	2	ATT	NC_000067.7:61490137
chromosome_01	59721215	C	CAGGA	C3H	4	AGGA	NC_000067.7:61866078
chromosome_01	59804496	A	ATATATG	C3H	2	AT	NC_000067.7:61949359
chromosome_01	60771318	T	TTCTCTC	C3H	2	TC	NC_000067.7:62921803
chromosome_01	61581018	G	GCTAT	C3H	2	CTAT	NC_000067.7:63721446
chromosome_01	61737703	GT	G	C3H	2		NC_000067.7:63877903
chromosome_01	62986108	T	TCTTC	C3H	1	TTCT	NC_000067.7:65148281
chromosome_01	63730945	G	GGA	C3H	4	GAGG	NC_000067.7:65852209
chromosome_01	64565704	TGGAA	T	C3H	4	GGAA	NC_000067.7:66715975
chromosome_01	65078108	AT	A	C3H	1		NC_000067.7:67224483
chromosome_01	65495144	T	TTTTATTTA	C3H	2	TTTA	NC_000067.7:67586154
chromosome_01	65639995	G	GATAT	C3H	1	AT	NC_000067.7:67732756
chromosome_01	65886483	T	TTAA	C3H	3	TAA	NC_000067.7:67962090
chromosome_01	71675007	TGATA	T	C3H	2	AGAT	NC_000067.7:73767355
chromosome_01	72656519	C	CCCTT	C3H	1	CTTC	NC_000067.7:74746580
chromosome_01	74090317	C	CCCTT	C3H	1	CTTC	NC_000067.7:76178455
chromosome_01	74817117	T	TGATA	C3H	1	GATA	NC_000067.7:76911029
chromosome_01	75582816	GTATC	G	C3H	1	GTAT	NC_000067.7:77671314
chromosome_01	76055666	C	CTAT	C3H	3	ATT	NC_000067.7:78132938
chromosome_01	76398129	ATT	A	C3H	4		NC_000067.7:78482613
chromosome_01	77785865	G	GAGAT	C3H	1	AGAT	NC_000067.7:79877775
chromosome_01	79598068	C	CTCTA	C3H	1	TCTA	NC_000067.7:81703089
chromosome_01	80665182	G	GTAGA	C3H	1	TAGA	NC_000067.7:82764361
chromosome_01	80725731	A	AAAAAC	C3H	3	AAAAC	NC_000067.7:82824885
chromosome_01	81126563	GTCTA	G	C3H	2	TATC	NC_000067.7:83225460
chromosome_01	81351451	A	AAAAAC	C3H	2	AAAAC	NC_000067.7:83449934
chromosome_01	82180502	C	CAGAT	C3H	1	ATAG	NC_000067.7:84278871
chromosome_01	82694850	G	GCACACACGCA	C3H	2	AC	NC_000067.7:84790245
chromosome_01	82705046	T	TAGGA	C3H	3	AGGA	NC_000067.7:84800439
chromosome_01	82986785	C	CAAGA	C3H	2	AAGA	NC_000067.7:85082050
chromosome_01	85628749	GTATC	G	C3H	1	ATCTATCT	NC_000067.7:85416488
chromosome_01	85686439	A	AAATT	C3H	3	AATT	NC_000067.7:85474160
chromosome_01	85911553	T	TCGTG	C3H	2	CGTG	NC_000067.7:85699022
chromosome_01	87530895	G	GTCTA	C3H	1	TCTA
chromosome_01	88703452	G	GAAATA	C3H	3	AAATA	NC_000067.7:88490642
chromosome_01	88942810	ATGTAT	A	C3H	2	TGTAT	NC_000067.7:88729983
chromosome_01	89056518	TGATA	T	C3H	2	TAGA	NC_000067.7:88843515
chromosome_01	90516731	GTGTATA	G	C3H	4	TGTGTA	NC_000067.7:90303530
chromosome_01	92051471	CACATAT	C	C3H	2	ACATAT	NC_000067.7:91842173
chromosome_01	92965784	TACACAC	T	C3H	4	AC	NC_000067.7:92746891
chromosome_01	93603105	C	CAAAT	C3H	2	AAAT	NC_000067.7:93387537
chromosome_01	94474035	AT	A	C3H	2		NC_000067.7:94333498
chromosome_01	94719773	TCTCC	T	C3H	2	CTCC	NC_000067.7:94572854
chromosome_01	95526728	A	AAAAT	C3H	1	AAAT	NC_000067.7:95379790
chromosome_01	96377435	AT	A	C3H	1		NC_000067.7:96230040
chromosome_01	97154042	T	TTAGA	C3H	4	TAGA	NC_000067.7:97006341
chromosome_01	98085524	CA	C	C3H	4		NC_000067.7:97937172
chromosome_01	99000006	G	GTTTGT	C3H	2	TTTGT	NC_000067.7:98851615
chromosome_01	99303953	CTATT	C	C3H	4	TATT	NC_000067.7:99155479
chromosome_01	100543416	C	CATTT	C3H	1	ATTT	NC_000067.7:100402297
chromosome_01	100692444	G	GTATA	C3H	2	AT	NC_000067.7:100550989
chromosome_01	103310121	T	TTCTC	C3H	4	TC	NC_000067.7:103172512
chromosome_01	103474954	C	CATCT	C3H	1	TATC	NC_000067.7:103338049
chromosome_01	103593088	G	GAGGA	C3H	4	AGGA	NC_000067.7:103456243
chromosome_01	105178600	TGATA	T	C3H	2	ATAG	NC_000067.7:105008732
chromosome_01	106115776	A	AAAT	C3H	4	AAT	NC_000067.7:105917034
chromosome_01	106593063	TTATC	T	C3H	2	TATC	NC_000067.7:106386861
chromosome_01	107341725	ATATC	A	C3H	2	TATC	NC_000067.7:107120985
chromosome_01	110366267	AGAAGAG	A	C3H	1	GAA	NC_000067.7:110194956
chromosome_01	110670010	CTCTGTG	C	C3H	3	TCTGTG	NC_000067.7:110501428
chromosome_01	111388589	C	CTCTA	C3H	3	TCTA	NC_000067.7:111193179
chromosome_01	112799923	TG	T	C3H	2		NC_000067.7:112587203
chromosome_01	115304007	A	AAAAT	C3H	4	AAAT	NC_000067.7:115101960
chromosome_01	115389803	GA	G	C3H	3		NC_000067.7:115187359
chromosome_01	115400444	G	GTAGA	C3H	4	TAGA	NC_000067.7:115198017
chromosome_01	115581420	CATAG	C	C3H	1	ATAG	NC_000067.7:115348589
chromosome_01	115959930	C	CTTAT	C3H	2	TTAT	NC_000067.7:115738586
chromosome_01	116146057	GTCTA	G	C3H	3	TCTA	NC_000067.7:115929670
chromosome_01	116265875	CGTGT	C	C3H	2	GT	NC_000067.7:116048855
chromosome_01	116802024	C	CTCTA	C3H	2	TCTA	NC_000067.7:116571175
chromosome_01	117742396	A	AAT	C3H	3		NC_000067.7:117573294
chromosome_01	117803114	A	ATTTC	C3H	3	TTTC	NC_000067.7:117641090
chromosome_01	118274563	AC	A	C3H	4		NC_000067.7:118136185
chromosome_01	119075038	T	TATA	C3H	2	ATA	NC_000067.7:118930921
chromosome_01	119524646	CAAAT	C	C3H	1	AAAC	NC_000067.7:119377774
chromosome_01	120309689	TTATC	T	C3H	2	TATC	NC_000067.7:120161071
chromosome_01	120309965	T	TTATC	C3H	2	TATC
chromosome_01	120729020	T	TTATC	C3H	1	TATC	NC_000067.7:120576378
chromosome_01	120937748	AGAGCTCCT	A	C3H	3		NC_000067.7:120779439
chromosome_01	122609847	GCT	G	C3H	1	CT	NC_000067.7:122453434
chromosome_01	124766585	TAGATAGAGATAG	T	C3H	4	AGATAG	NC_000067.7:124602587
chromosome_01	125015168	T	TATAG	C3H	1	ATAG	NC_000067.7:124843494
chromosome_01	125766452	T	TAATA	C3H	4	AATA	NC_000067.7:125641780
chromosome_01	126045047	C	CCATA	C3H	2	CATA	NC_000067.7:125918835
chromosome_01	126922520	A	AAAAC	C3H	1	CAAA	NC_000067.7:126792183
chromosome_01	127390523	AGGAG	A	C3H	2	AAGG	NC_000067.7:127256776
chromosome_01	127740748	GTAGA	G	C3H	2	TAAATAAG
chromosome_01	127788940	GC	G	C3H	2		NC_000067.7:127664172
chromosome_01	128359419	A	AT	C3H	2	GATTTTTTCTCTGTGTGTGGGCACTGTAAGCCGTGGTACACGTGTCAGGT	NC_000067.7:128245424
chromosome_01	128410266	C	CATCT	C3H	3	ATCTATAC	NC_000067.7:128296240
chromosome_01	128728332	T	TTTCC	C3H	1	TTCC	NC_000067.7:128617076
chromosome_01	128861759	C	CATTT	C3H	2	ATTT	NC_000067.7:128749053
chromosome_01	128963772	AATCT	A	C3H	4	ATCT	NC_000067.7:128851058
chromosome_01	129969814	GTAGA	G	C3H	2	GATA	NC_000067.7:129856565
chromosome_01	130199847	A	AAAGG	C3H	3	AGAA	NC_000067.7:130086571
chromosome_01	131012493	AATAG	A	C3H	2	ATAG	NC_000067.7:130899128
chromosome_01	131075422	A	AGAT	C3H	3	AGAT	NC_000067.7:130962027
chromosome_01	131075429	T	TA	C3H	3	AGAT	NC_000067.7:130962034
chromosome_01	132181153	CGAG	C	C3H	3	AGG	NC_000067.7:132065384
chromosome_01	132737751	AATAG	A	C3H	2	AGAT	NC_000067.7:132619983
chromosome_01	133526319	T	TTG	C3H	3	TG	NC_000067.7:133408465
chromosome_01	136777620	T	TTTTA	C3H	4	TATT	NC_000067.7:136639529
chromosome_01	136823068	T	TTG	C3H	4	TG	NC_000067.7:136684984
chromosome_01	136944423	CTTAAAGAGACT	C	C3H	1		NC_000067.7:136806291
chromosome_01	137286810	T	TA	C3H	1		NC_000067.7:137148663
chromosome_01	138787579	GAGGA	G	C3H	4	GAAG	NC_000067.7:138654402
chromosome_01	139381350	A	AAAAG	C3H	3	AAAG	NC_000067.7:139232186
chromosome_01	140119030	T	TGATA	C3H	3	AGAT	NC_000067.7:139944430
chromosome_01	140811015	GTATC	G	C3H	2	TATC	NC_000067.7:140632834
chromosome_01	141014612	A	AATT	C3H	2	ATT	NC_000067.7:140839029
chromosome_01	141557126	AT	A	C3H	1		NC_000067.7:141371850
chromosome_01	141605845	A	AGAAG	C3H	2	AAGG	NC_000067.7:141419999
chromosome_01	142902320	AAGAT	A	C3H	1	TAGA	NC_000067.7:142719283
chromosome_01	143371279	A	AAAAT	C3H	2	AAAT	NC_000067.7:143174937
chromosome_01	144554899	T	TTTCC	C3H	2	TTCC	NC_000067.7:144360549
chromosome_01	147363070	AATTT	A	C3H	2	ATTT	NC_000067.7:147151755
chromosome_01	147857405	A	AGAAG	C3H	2	GAAG	NC_000067.7:147675862
chromosome_01	148862787	T	TTTCC	C3H	1	TTCC	NC_000067.7:148664059
chromosome_01	149089728	TGATA	T	C3H	3	ATAG	NC_000067.7:148894913
chromosome_01	149568354	TTAGA	T	C3H	2	TAGA	NC_000067.7:149362476
chromosome_01	149979126	G	GGGAA	C3H	2	GGAA	NC_000067.7:149783412
chromosome_01	154068277	CATCT	C	C3H	2	TATC	NC_000067.7:153834422
chromosome_01	154297900	CTCTA	C	C3H	2	TCTA	NC_000067.7:154063742
chromosome_01	154609005	G	GTT	C3H	4		NC_000067.7:154372257
chromosome_01	155101073	G	GAGGT	C3H	4	AGAT	NC_000067.7:154864307
chromosome_01	155243571	TTATC	T	C3H	1	TATC	NC_000067.7:155006782
chromosome_01	155639225	TCTTC	T	C3H	4	CTTC	NC_000067.7:155402420
chromosome_01	155826478	AAATG	A	C3H	1	GAAT
chromosome_01	155929114	GAAAT	G	C3H	1	AAAT	NC_000067.7:155693826
chromosome_01	156057066	CT	C	C3H	1		NC_000067.7:155822266
chromosome_01	156306296	AGTAT	A	C3H	3	GTAT	NC_000067.7:156070390
chromosome_01	156453173	G	GCT	C3H	2	CTCT	NC_000067.7:156217471
chromosome_01	156816167	T	TTGTG	C3H	2	TG	NC_000067.7:156582650
chromosome_01	157047241	C	CCTAT	C3H	4	CTAT	NC_000067.7:156816310
chromosome_01	157721177	C	CATCT	C3H	4	ATCT
chromosome_01	159908837	AACACACACAC	A	C3H	1	AC	NC_000067.7:159659824
chromosome_01	160204614	A	AAGAT	C3H	2	ATAG
chromosome_01	161316754	C	CCCTT	C3H	3	CCTT	NC_000067.7:161047850
chromosome_01	163427844	C	CGTGT	C3H	3	GTGTGTGTGAGTGTTTCACCAAAGCTCACTGAGCACAC	NC_000067.7:163170328
chromosome_01	165325411	GAAAGAA	G	C3H	4	AGAAAA	NC_000067.7:165060838
chromosome_01	166202176	C	CATAG	C3H	3	ATAG	NC_000067.7:165936225
chromosome_01	166433427	G	GACAC	C3H	3	AC	NC_000067.7:166167459
chromosome_01	167200337	T	TAC	C3H	1	AC	NC_000067.7:166933180
chromosome_01	168011935	G	GGA	C3H	4	GA	NC_000067.7:167743669
chromosome_01	169271749	C	CATAG	C3H	3	ATAG	NC_000067.7:169034377
chromosome_01	169678561	A	AATCT	C3H	1	ATCT	NC_000067.7:169463648
chromosome_01	171470755	TCTTTC	T	C3H	4	CTTTC	NC_000067.7:171144752
chromosome_01	173647830	TTCTA	T	C3H	3	TCTA	NC_000067.7:172868846
chromosome_01	175370114	CT	C	C3H	2	T	NC_000067.7:174529969
chromosome_01	175827121	AACACACACACACACAC	A	C3H	1	AC
chromosome_01	176120967	T	TGATA	C3H	3	GATA	NC_000067.7:175269176
chromosome_01	177297565	AAGAT	A	C3H	2	AGAT	NC_000067.7:176445574
chromosome_01	177567616	GAAGGA	G	C3H	4	GGAAA	NC_000067.7:176718067
chromosome_01	177675186	TGATA	T	C3H	3	AGAT	NC_000067.7:176829688
chromosome_01	179794981	T	TCAGA	C3H	2	CAGA	NC_000067.7:178950048
chromosome_01	179932354	CAAGG	C	C3H	3	AAGG	NC_000067.7:179087302
chromosome_01	180653959	A	ATATC	C3H	2	TATCTATATC	NC_000067.7:179808598
chromosome_01	180965691	GTCTA	G	C3H	1	TCTA	NC_000067.7:180120264
chromosome_01	181299623	A	AAAT	C3H	2	AAT	NC_000067.7:180454194
chromosome_01	184232670	T	TTATC	C3H	2	TC	NC_000067.7:183373244
chromosome_01	184267449	T	TTATC	C3H	2	TATC	NC_000067.7:183400751
chromosome_01	184540340	AAAGG	A	C3H	1	AAGG	NC_000067.7:183671655
chromosome_01	184611626	T	TGATA	C3H	2	ATAG	NC_000067.7:183742531
chromosome_01	185374540	T	TTTA	C3H	2	TTA	NC_000067.7:184496730
chromosome_01	185408457	C	CATAA	C3H	4	ATAA	NC_000067.7:184530411
chromosome_01	185543989	C	CTTATT	C3H	2	TTATT	NC_000067.7:184665726
chromosome_01	185856681	CTTCT	C	C3H	2	CTTT	NC_000067.7:184987000
chromosome_01	186991910	C	CTGTT	C3H	1	TGTT	NC_000067.7:186120376
chromosome_01	187323761	A	AT	C3H	4		NC_000067.7:186451068
chromosome_01	187584354	C	CTTCT	C3H	2	TTTC	NC_000067.7:186715150
chromosome_01	187981504	T	TAATA	C3H	2	AATA	NC_000067.7:187119899
chromosome_01	188082069	C	CAATAAT	C3H	4	AAT	NC_000067.7:187221068
chromosome_01	188566316	GGGAA	G	C3H	3	GGAA	NC_000067.7:187706960
chromosome_01	189250769	T	TTAGA	C3H	3	ATAG	NC_000067.7:188396008
chromosome_01	190200840	CAGAT	C	C3H	4	GATA	NC_000067.7:189342253
chromosome_01	191324124	CAATA	C	C3H	4	AC	NC_000067.7:190450926
chromosome_01	191523451	T	TGATA	C3H	2	AGAT	NC_000067.7:190649729
chromosome_01	191523953	ACAGTGGCCAGG	A	C3H	4	TGGCCAGGCAG
chromosome_01	194455556	AGTCC	A	C3H	4		NC_000067.7:193587753
chromosome_02	290447	TTTGTTG	T	C3H	3	TTG	NC_000068.8:3339515
chromosome_02	582103	T	TTTTG	C3H	3	TTTG	NC_000068.8:3631162
chromosome_02	623237	CATCT	C	C3H	3	ATCT	NC_000068.8:3672296
chromosome_02	755664	C	CTATTAT	C3H	4	TAT	NC_000068.8:3804730
chromosome_02	2086869	AAAAAC	A	C3H	3	AAAAC	NC_000068.8:5121010
chromosome_02	2709913	T	TTAA	C3H	1	AAT	NC_000068.8:5749608
chromosome_02	5132337	G	GTC	C3H	4	TC	NC_000068.8:8175860
chromosome_02	7026806	A	AATCT	C3H	4	ATCT	NC_000068.8:10068762
chromosome_02	7386522	G	GTCTA	C3H	1	TCTA	NC_000068.8:10423010
chromosome_02	7822830	G	GAAGA	C3H	2	AAGG	NC_000068.8:10858853
chromosome_02	8273423	G	GGATA	C3H	1	GATA	NC_000068.8:11308527
chromosome_02	11170848	T	TG	C3H	3		NC_000068.8:14201896
chromosome_02	12416361	C	CA	C3H	3		NC_000068.8:15447075
chromosome_02	14142662	T	TGATA	C3H	4	GATA	NC_000068.8:17172399
chromosome_02	16570942	C	CTAGA	C3H	2	TAGA	NC_000068.8:19598259
chromosome_02	16749908	C	CATCT	C3H	2	ATCT	NC_000068.8:19777148
chromosome_02	16846176	G	GTCTA	C3H	2	TCTA	NC_000068.8:19873408
chromosome_02	19536633	T	TATAA	C3H	1	ATAA	NC_000068.8:22562793
chromosome_02	21991765	T	TCTTC	C3H	4	TCCT	NC_000068.8:25011599
chromosome_02	22031528	ATG	A	C3H	3	TG	NC_000068.8:25051360
chromosome_02	22611507	C	CATCT	C3H	4	ATCT	NC_000068.8:25631308
chromosome_02	24680717	ATATC	A	C3H	4	TATC	NC_000068.8:27699630
chromosome_02	27226380	CGTGT	C	C3H	4	GT	NC_000068.8:30243454
chromosome_02	27517520	C	CAGAGGCAG	C3H	4	GCAGAG	NC_000068.8:30534468
chromosome_02	28937422	TG	T	C3H	1		NC_000068.8:31953009
chromosome_02	32819365	T	TAATA	C3H	4	AATA	NC_000068.8:35821466
chromosome_02	34292592	CAGATGACCGTA	C	C3H	3		NC_000068.8:37291430
chromosome_02	34706561	G	GTCTA	C3H	1	TATC	NC_000068.8:37703490
chromosome_02	36250574	G	GTCTA	C3H	2	TCTA	NC_000068.8:39241252
chromosome_02	36425424	CATCT	C	C3H	2	CTAT	NC_000068.8:39414428
chromosome_02	36443724	GATCT	G	C3H	4	ATCT	NC_000068.8:39438444
chromosome_02	37932193	GTCTA	G	C3H	4	TCTA	NC_000068.8:40920333
chromosome_02	48546839	GTAGA	G	C3H	3	ATAG
chromosome_02	50171230	CATA	C	C3H	4	ATA	NC_000068.8:53126502
chromosome_02	52960679	T	TGATA	C3H	3	GATA
chromosome_02	55414656	G	GAGAT	C3H	4	AGAT	NC_000068.8:58334612
chromosome_02	55655713	AG	A	C3H	4		NC_000068.8:58574702
chromosome_02	56485423	C	CACAT	C3H	1	ACAT	NC_000068.8:59403503
chromosome_02	57344674	T	TTATC	C3H	3	TATC	NC_000068.8:60261586
chromosome_02	58198132	A	ATATC	C3H	3	TATC	NC_000068.8:61114022
chromosome_02	58380722	C	CATATGT	C3H	3	ATATGT	NC_000068.8:61296463
chromosome_02	58678548	T	TTTG	C3H	4	TTG	NC_000068.8:61594259
chromosome_02	60016147	C	CATAG	C3H	2	ATAG	NC_000068.8:62921961
chromosome_02	60330213	C	CTG	C3H	3	TG	NC_000068.8:63236015
chromosome_02	60367202	C	CAGAT	C3H	3	AGAT	NC_000068.8:63273006
chromosome_02	60639140	C	CGAAG	C3H	2	GAAG	NC_000068.8:63544714
chromosome_02	60737374	CATAG	C	C3H	2	ATAG	NC_000068.8:63642901
chromosome_02	61140491	G	GTGAA	C3H	2	AATG	NC_000068.8:64045574
chromosome_02	61373398	T	TGGAA	C3H	3	GGAA	NC_000068.8:64278405
chromosome_02	61922958	GGGAA	G	C3H	4	GAAG	NC_000068.8:64827619
chromosome_02	66098729	AATAG	A	C3H	4	GATA	NC_000068.8:68932063
chromosome_02	70847205	TCACACACACACACACACACACACA	T	C3H	3	CA	NC_000068.8:73661385
chromosome_02	71055177	T	TTATC	C3H	4	ATCT	NC_000068.8:73869103
chromosome_02	71267581	CATCT	C	C3H	4	TATC	NC_000068.8:74081720
chromosome_02	71268082	T	TTATCTATC	C3H	2	TATC	NC_000068.8:74082284
chromosome_02	71268191	T	TTATC	C3H	4	TATC
chromosome_02	71495201	TGATAGATA	T	C3H	2	AGAT	NC_000068.8:74325136
chromosome_02	73115262	G	GTCTA	C3H	3	TCTA	NC_000068.8:75944754
chromosome_02	73524359	CAGAT	C	C3H	4	AGAT	NC_000068.8:76352783
chromosome_02	74525504	A	AAACC	C3H	4	AACC	NC_000068.8:77353630
chromosome_02	75057644	C	CATATA	C3H	4	ATATA	NC_000068.8:77885759
chromosome_02	75219564	CATCT	C	C3H	3	CTAT	NC_000068.8:78047377
chromosome_02	76915456	GTAGA	G	C3H	2	GATA	NC_000068.8:79740199
chromosome_02	77492825	AC	A	C3H	2		NC_000068.8:80309669
chromosome_02	77895124	GTCTA	G	C3H	4	TCTA	NC_000068.8:80718270
chromosome_02	77939820	A	AATCT	C3H	4	ATCT	NC_000068.8:80762974
chromosome_02	77939964	TTCTA	T	C3H	4	ATCT	NC_000068.8:80763122
chromosome_02	78480628	T	TTACA	C3H	3	TACA	NC_000068.8:81303087
chromosome_02	78842446	C	CATCT	C3H	3	ATCT	NC_000068.8:81673012
chromosome_02	80290972	CAAG	C	C3H	2		NC_000068.8:83119556
chromosome_02	80350647	TGATA	T	C3H	4	AGAT	NC_000068.8:83179230
chromosome_02	82145680	CCCAT	C	C3H	2	ATCT	NC_000068.8:85048679
chromosome_02	83908416	A	AT	C3H	4		NC_000068.8:86835999
chromosome_02	84276279	TGATA	T	C3H	3	ATAG	NC_000068.8:87189149
chromosome_02	85247141	CAT	C	C3H	2	TA	NC_000068.8:88096758
chromosome_02	85545375	T	TTA	C3H	1	TA
chromosome_02	86831277	TATAATA	T	C3H	3	TAA	NC_000068.8:89675496
chromosome_02	93420226	GTCTA	G	C3H	4	TATC
chromosome_02	95196351	ATGTCCTTC	A	C3H	1		NC_000068.8:98117875
chromosome_02	95381186	C	CAAT	C3H	4	AAT	NC_000068.8:98314944
chromosome_02	95475630	T	TTAA	C3H	2	TAA	NC_000068.8:98409331
chromosome_02	96395395	C	CATT	C3H	4	ATT	NC_000068.8:99329394
chromosome_02	96498241	GAGAGA	G	C3H	1	AGAAG
chromosome_02	97019008	AAAAG	A	C3H	3	AAAAG	NC_000068.8:99955761
chromosome_02	97261666	G	GAAGA	C3H	4	GAAA	NC_000068.8:100189039
chromosome_02	97442241	T	TATAG	C3H	2	ATAG
chromosome_02	101013099	GTAGA	G	C3H	2	GATA	NC_000068.8:104101831
chromosome_02	101016184	CATT	C	C3H	3	TTA	NC_000068.8:104105136
chromosome_02	101169934	GATAC	G	C3H	4	AGAT
chromosome_02	101461805	CAATA	C	C3H	3	AATA	NC_000068.8:104538151
chromosome_02	101848152	CATCA	C	C3H	3	ATCA	NC_000068.8:104924701
chromosome_02	102199533	T	TTAAA	C3H	2	TAAA	NC_000068.8:105276555
chromosome_02	102765818	TTAGA	T	C3H	1	TAGA	NC_000068.8:105826159
chromosome_02	103217924	CAGAT	C	C3H	3	AGAT
chromosome_02	103533623	AAAGG	A	C3H	1	AAAG	NC_000068.8:106567523
chromosome_02	103584479	GAGGA	G	C3H	4	AGGA	NC_000068.8:106618980
chromosome_02	103724797	T	TCATCCATCCATC	C3H	1	TCCA	NC_000068.8:106758363
chromosome_02	103903584	CATTT	C	C3H	3	ATTT	NC_000068.8:106939052
chromosome_02	103919386	GATCT	G	C3H	2	ATCT	NC_000068.8:106954834
chromosome_02	104273947	TCA	T	C3H	3	CA	NC_000068.8:107303935
chromosome_02	104300203	A	AAAAT	C3H	2	AAAT	NC_000068.8:107330123
chromosome_02	104362876	T	TTATA	C3H	2	TA	NC_000068.8:107392295
chromosome_02	104887515	AAAT	A	C3H	2	AAT	NC_000068.8:107914659
chromosome_02	105344581	AAAT	A	C3H	2	AAT	NC_000068.8:108366819
chromosome_02	106038196	TTAAATAAA	T	C3H	3	TAAA	NC_000068.8:109042809
chromosome_02	107053944	TTCTA	T	C3H	1	TCTA	NC_000068.8:110063500
chromosome_02	107908419	A	AAAT	C3H	1	CCAAATAAC	NC_000068.8:110920335
chromosome_02	108994072	TGATA	T	C3H	4	ATAG	NC_000068.8:111968914
chromosome_02	109127846	GGATA	G	C3H	3	GATA	NC_000068.8:112099800
chromosome_02	111529396	TGA	T	C3H	4	AGAG	NC_000068.8:114511133
chromosome_02	112977748	AGCTGAGGCAGGT	A	C3H	4		NC_000068.8:115923527
chromosome_02	113019163	CCTAT	C	C3H	2	TATC
chromosome_02	113924800	A	AATAG	C3H	4	ATAG	NC_000068.8:116860633
chromosome_02	114033035	CATAA	C	C3H	2	ATAA	NC_000068.8:116975770
chromosome_02	114429244	GTATATATATATATATATA	G	C3H	1	TA	NC_000068.8:117359818
chromosome_02	115728540	C	CCTAT	C3H	2	CTAT	NC_000068.8:118632216
chromosome_02	116113101	TTTTA	T	C3H	3	TTTA	NC_000068.8:119020734
chromosome_02	119747379	TTTTTA	T	C3H	1	TTTTA
chromosome_02	121937389	G	GGGAA	C3H	2	GGAA	NC_000068.8:124753849
chromosome_02	122079894	T	TGATA	C3H	2	GATA
chromosome_02	122080744	T	TGATA	C3H	3	GATA	NC_000068.8:124891275
chromosome_02	122680052	GTAGA	G	C3H	1	TAGA	NC_000068.8:125488053
chromosome_02	122680150	T	TTAGA	C3H	2	TAGA
chromosome_02	122916730	TTTTA	T	C3H	3	TTTA	NC_000068.8:125726568
chromosome_02	123457942	A	AATAG	C3H	3	GATA
chromosome_02	124403137	CATCT	C	C3H	4	TCTA	NC_000068.8:127145845
chromosome_02	124624597	CTATT	C	C3H	4	TATT	NC_000068.8:127366561
chromosome_02	125621613	C	CAGAT	C3H	4	AGAT
chromosome_02	125625682	AAGAT	A	C3H	4	AGAT	NC_000068.8:128372495
chromosome_02	125842263	T	TATAA	C3H	1	ATAA	NC_000068.8:128589950
chromosome_02	125860463	CATTG	C	C3H	2	ATTG	NC_000068.8:128607553
chromosome_02	126941346	C	CCCTT	C3H	4	TTCC	NC_000068.8:129684754
chromosome_02	127337213	A	AGAAT	C3H	3	GAAT	NC_000068.8:130075182
chromosome_02	128416074	T	TTCACC	C3H	4	TCACC	NC_000068.8:131149293
chromosome_02	129072833	T	TGATA	C3H	2	ATAG	NC_000068.8:131817199
chromosome_02	129457976	G	GTCTA	C3H	1	ATCT	NC_000068.8:132195588
chromosome_02	129581516	AAGAAG	A	C3H	4	AGAGA	NC_000068.8:132313698
chromosome_02	129908566	T	TTATC	C3H	2	TATC	NC_000068.8:132630708
chromosome_02	131262602	A	AACACAC	C3H	3	AC	NC_000068.8:133976689
chromosome_02	134017605	GTATATATATATATA	G	C3H	4	AT	NC_000068.8:136724719
chromosome_02	134561634	ATCCTTC	A	C3H	1	TTCTCCTTCTCC	NC_000068.8:137268479
chromosome_02	134710501	G	GATT	C3H	3	ATT	NC_000068.8:137417337
chromosome_02	135894120	TTGTGTGTGTG	T	C3H	2	TG	NC_000068.8:138600342
chromosome_02	137225480	TTAATAA	T	C3H	4	TAA	NC_000068.8:139931241
chromosome_02	138573298	A	AAAGG	C3H	2	AAGG	NC_000068.8:141277670
chromosome_02	140597604	TATGAG	T	C3H	3	ATGAG	NC_000068.8:143299785
chromosome_02	141318741	C	CATAG	C3H	3	ATAG	NC_000068.8:144020855
chromosome_02	142139491	G	GATCT	C3H	1	ATCT	NC_000068.8:144841663
chromosome_02	142902567	G	GATAA	C3H	2	AAAT	NC_000068.8:145604686
chromosome_02	143307102	G	GT	C3H	3		NC_000068.8:146019669
chromosome_02	144662262	C	CCTCCT	C3H	3	TCCTC	NC_000068.8:147364630
chromosome_02	145073954	C	CAATA	C3H	3	AATA	NC_000068.8:147775529
chromosome_02	145902144	TTATC	T	C3H	3	TATC	NC_000068.8:148616184
chromosome_02	146337542	GT	G	C3H	2		NC_000068.8:149051088
chromosome_02	149310432	A	AATCT	C3H	4	TCTA	NC_000068.8:152010480
chromosome_02	149698137	G	GTATACA	C3H	2	TATACA	NC_000068.8:152398006
chromosome_02	151422860	A	AT	C3H	2		NC_000068.8:154104351
chromosome_02	151466363	GAGAC	G	C3H	4	AGAC	NC_000068.8:154147842
chromosome_02	152273531	T	TATA	C3H	2	ATA	NC_000068.8:154950288
chromosome_02	152894460	T	TGATA	C3H	2	GATA	NC_000068.8:155567352
chromosome_02	153913377	AC	A	C3H	4		NC_000068.8:156602027
chromosome_02	155279555	CTAGA	C	C3H	2	TAGACAGA	NC_000068.8:157968280
chromosome_02	156271594	C	CTCTA	C3H	1	CT	NC_000068.8:158966796
chromosome_02	156783126	GGATA	G	C3H	1	TAGA	NC_000068.8:159478332
chromosome_02	158315385	G	GCCAAA	C3H	1	AACCA	NC_000068.8:161002550
chromosome_02	158464387	T	TTTA	C3H	3	TTA	NC_000068.8:161140154
chromosome_02	160065065	A	AATAG	C3H	1	ATAG	NC_000068.8:162745697
chromosome_02	161121160	C	CTTAT	C3H	4	TTAT
chromosome_02	161709484	GCTTC	G	C3H	1	CTTC	NC_000068.8:164412969
chromosome_02	162102034	CTGTG	C	C3H	4	TG	NC_000068.8:164800405
chromosome_02	165094844	T	TTTGC	C3H	4	TTGC
chromosome_02	166425096	TTATC	T	C3H	4	TCTA	NC_000068.8:169108300
chromosome_02	167768266	A	AAC	C3H	4	AC	NC_000068.8:170446687
chromosome_02	167977669	A	ACTAT	C3H	4	CTAT	NC_000068.8:170655354
chromosome_02	168198907	A	ATG	C3H	2	TG	NC_000068.8:170876988
chromosome_02	169235719	TGATA	T	C3H	4	ATAG	NC_000068.8:171927010
chromosome_02	170941766	G	GGAGA	C3H	4	GA	NC_000068.8:173619723
chromosome_02	172107052	G	GTCTA	C3H	3	CTAT	NC_000068.8:174783919
chromosome_02	173307420	C	CAATAA	C3H	4	AATAA	NC_000068.8:177034744
chromosome_02	175666276	T	TGATA	C3H	3	GATA	NC_000068.8:179345635
chromosome_02	175741977	AGATT	A	C3H	4	ATAG	NC_000068.8:179420819
chromosome_02	177863222	AAAATAAATAAATAAAT	A	C3H	1	AAAT	NC_000068.8:181558592
chromosome_03	4233870	AT	A	C3H	3		NC_000069.7:3914339
chromosome_03	4342542	C	CTCTA	C3H	1	TCTA	NC_000069.7:4023037
chromosome_03	4342678	GTCTA	G	C3H	2	TCTA	NC_000069.7:4023165
chromosome_03	6411392	GGTTTCAGT	G	C3H	3	TTTG	NC_000069.7:6110398
chromosome_03	6832274	CAT	C	C3H	4	TATA	NC_000069.7:6544222
chromosome_03	10179058	C	CAG	C3H	3	AGAGGC	NC_000069.7:9868362
chromosome_03	10302662	ACCAT	A	C3H	1	CCATCCAT	NC_000069.7:9990385
chromosome_03	11562701	G	GGAA	C3H	1	GAA	NC_000069.7:11253122
chromosome_03	12177821	C	CTACATA	C3H	1	TACATA	NC_000069.7:11856221
chromosome_03	13008726	C	CA	C3H	4		NC_000069.7:12691404
chromosome_03	16899446	AT	A	C3H	2		NC_000069.7:16789019
chromosome_03	18170461	CA	C	C3H	2	A	NC_000069.7:18068822
chromosome_03	21527563	C	CGATA	C3H	1	ATAG	NC_000069.7:21403488
chromosome_03	21577750	C	CAGT	C3H	1	AGT	NC_000069.7:21453657
chromosome_03	21879919	C	CAAGG	C3H	4	AAGG	NC_000069.7:21755742
chromosome_03	23311683	GC	G	C3H	2		NC_000069.7:23186638
chromosome_03	23762002	C	CAA	C3H	2		NC_000069.7:23636948
chromosome_03	23914549	AACACACACACACACACACACACAC	A	C3H	1	AC	NC_000069.7:23789488
chromosome_03	24638853	A	ATATC	C3H	3	TATC	NC_000069.7:24513773
chromosome_03	24768602	A	ACTAT	C3H	3	CTAT	NC_000069.7:24643509
chromosome_03	25313225	TATC	T	C3H	2		NC_000069.7:25188113
chromosome_03	26615892	GTAATAA	G	C3H	2	TAA	NC_000069.7:26495457
chromosome_03	26800011	TGATA	T	C3H	2	TAGA	NC_000069.7:26686035
chromosome_03	28287437	C	CCTCTT	C3H	1	TCCTCTCTTC	NC_000069.7:28170592
chromosome_03	30509010	G	GAGAT	C3H	1	ATAG	NC_000069.7:30417940
chromosome_03	31078405	CA	C	C3H	4		NC_000069.7:30986310
chromosome_03	31290779	TTA	T	C3H	4	TA	NC_000069.7:31196685
chromosome_03	31471105	CCA	C	C3H	2	CA	NC_000069.7:31375261
chromosome_03	32383277	A	AAGAT	C3H	1	AGAT
chromosome_03	33892947	G	GAGAT	C3H	3	AGAT	NC_000069.7:33780018
chromosome_03	38009592	ATATC	A	C3H	2	TATC	NC_000069.7:37924601
chromosome_03	40789372	T	TTATTA	C3H	2	TATTATATTA	NC_000069.7:40731401
chromosome_03	41066621	TTCTTC	T	C3H	4	TCTCT	NC_000069.7:41008699
chromosome_03	41686637	A	ATATC	C3H	2	TATC	NC_000069.7:41635535
chromosome_03	42272499	G	GAAAC	C3H	2	AAAC	NC_000069.7:42206215
chromosome_03	42685919	A	AGAAG	C3H	1	GAAG	NC_000069.7:42615381
chromosome_03	43616523	C	CATCT	C3H	1	TATC
chromosome_03	43979226	T	TTAGA	C3H	2	TAGA	NC_000069.7:43940112
chromosome_03	46745430	T	TTATC	C3H	4	TATC	NC_000069.7:46676534
chromosome_03	48212300	ATGTATC	A	C3H	1	TATATG
chromosome_03	48957773	T	TTATC	C3H	4	TATC	NC_000069.7:48860822
chromosome_03	50064147	GTCTA	G	C3H	2	TCTA	NC_000069.7:50005032
chromosome_03	50173949	TTAGA	T	C3H	2	AGAT	NC_000069.7:50114863
chromosome_03	52006303	T	TCAAAA	C3H	1	CAAAA	NC_000069.7:51948183
chromosome_03	53021869	C	CATCT	C3H	1	ATCT	NC_000069.7:52958218
chromosome_03	53520692	ATATC	A	C3H	3	TCTA	NC_000069.7:53463449
chromosome_03	53730727	A	AATCT	C3H	3	ATCT	NC_000069.7:53667306
chromosome_03	53778933	G	GAGAT	C3H	1	ATAG	NC_000069.7:53715507
chromosome_03	53949253	TTCTA	T	C3H	4	TCTA	NC_000069.7:53885800
chromosome_03	54287220	A	AT	C3H	1		NC_000069.7:54223841
chromosome_03	54331265	AAGAT	A	C3H	1	AGAT	NC_000069.7:54267923
chromosome_03	55990198	TTAA	T	C3H	4	AAT	NC_000069.7:55924302
chromosome_03	56498863	GGATA	G	C3H	2	GATA	NC_000069.7:56432722
chromosome_03	56543597	AATAG	A	C3H	1	ATAG	NC_000069.7:56477411
chromosome_03	56761742	ACTAT	A	C3H	1	CTAT	NC_000069.7:56695523
chromosome_03	57727725	C	CATCTATCT	C3H	3	ATCT	NC_000069.7:57663026
chromosome_03	57757727	T	TTAA	C3H	3	TAA	NC_000069.7:57693028
chromosome_03	58232125	G	GATAGAT	C3H	1	ATATAG	NC_000069.7:58167230
chromosome_03	58301627	T	TGATA	C3H	4	AGAT	NC_000069.7:58236742
chromosome_03	58626202	TTATC	T	C3H	3	TCTA	NC_000069.7:58556560
chromosome_03	59993217	A	AAC	C3H	4	TACACACACACATA	NC_000069.7:59923951
chromosome_03	60497774	AT	A	C3H	1		NC_000069.7:60415365
chromosome_03	61866736	GAAAGA	G	C3H	2	AGAAA	NC_000069.7:61756403
chromosome_03	63124761	GGATA	G	C3H	4	GATA	NC_000069.7:63034999
chromosome_03	63455523	T	TGATA	C3H	2	AGAT	NC_000069.7:63363994
chromosome_03	68325130	G	GTAGA	C3H	1	TAGA	NC_000069.7:68208601
chromosome_03	70877226	C	CTTCT	C3H	4	TTTC	NC_000069.7:70788052
chromosome_03	70914695	ATATC	A	C3H	3	TCTA	NC_000069.7:70825583
chromosome_03	73057676	T	TGATA	C3H	4	AGAT	NC_000069.7:72942609
chromosome_03	73060930	TGATA	T	C3H	3	GATA	NC_000069.7:72945859
chromosome_03	73445530	TGATA	T	C3H	2	AGAT	NC_000069.7:73327466
chromosome_03	74106581	T	TG	C3H	3		NC_000069.7:73984469
chromosome_03	74189471	G	GTAA	C3H	3	TAA	NC_000069.7:74067376
chromosome_03	76022570	AG	A	C3H	3		NC_000069.7:75902795
chromosome_03	76162559	A	ATATC	C3H	2	TATC	NC_000069.7:76042782
chromosome_03	76732109	G	GA	C3H	2	A	NC_000069.7:76610591
chromosome_03	80857292	ATATAT	A	C3H	4	TATAT	NC_000069.7:80761235
chromosome_03	83724068	TTTCTC	T	C3H	4	TTCTC	NC_000069.7:83600924
chromosome_03	84706965	T	TTATC	C3H	2	TCTA	NC_000069.7:84590753
chromosome_03	85155991	CT	C	C3H	2	TTTTTA	NC_000069.7:85038257
chromosome_03	86959972	TAGGA	T	C3H	2	AGGA	NC_000069.7:86847208
chromosome_03	89220682	T	TTAGA	C3H	3	TAGA	NC_000069.7:89100567
chromosome_03	89644818	G	GTTTA	C3H	4	ATTT	NC_000069.7:89524255
chromosome_03	89669161	A	AATAG	C3H	2	ATAG	NC_000069.7:89548588
chromosome_03	92632707	GCTGCTGCTGCTTTCCCAGAGGCAGTTCTGGTTCAGGTGACTC	G	C3H	4	CTGCTGCTTTCCCAGGTACAGTTCTGGTTCAGGTGACTCCTGGTG	NC_000069.7:92479220
chromosome_03	94952632	TGATA	T	C3H	4	GATA	NC_000069.7:94361401
chromosome_03	95264375	C	CAATA	C3H	3	AATA	NC_000069.7:94681801
chromosome_03	95637426	G	GTTAA	C3H	3	TTAA	NC_000069.7:95054991
chromosome_03	97461767	C	CTCTA	C3H	4	TCTA	NC_000069.7:96824742
chromosome_03	98106867	A	ATAT	C3H	2	TAT	NC_000069.7:97469298
chromosome_03	98553383	TA	T	C3H	3		NC_000069.7:97915751
chromosome_03	100172250	AG	A	C3H	1		NC_000069.7:99576494
chromosome_03	103607536	TTCTA	T	C3H	1	TCTA	NC_000069.7:102995987
chromosome_03	103774725	G	GTCTA	C3H	4	TATC	NC_000069.7:103158545
chromosome_03	103912007	CCTTT	C	C3H	2	TTTC	NC_000069.7:103295833
chromosome_03	104402653	T	TTATC	C3H	4	TATC	NC_000069.7:103780590
chromosome_03	105502923	CGTGT	C	C3H	3	GT	NC_000069.7:104874481
chromosome_03	106348708	TACACAC	T	C3H	1	AC	NC_000069.7:105730318
chromosome_03	107263673	A	ACCCACT	C3H	1		NC_000069.7:106634412
chromosome_03	107598157	G	GGAGAA	C3H	1	GGAGA	NC_000069.7:106968166
chromosome_03	107741012	TGATA	T	C3H	2	AGAT	NC_000069.7:107105089
chromosome_03	109505410	G	GAGGA	C3H	1	AAGG	NC_000069.7:108863051
chromosome_03	109706824	C	CTCTA	C3H	3	TCTA	NC_000069.7:109061494
chromosome_03	110728057	T	TTATC	C3H	4	TATC	NC_000069.7:110090543
chromosome_03	111093154	C	CTTCT	C3H	4	TTCTT	NC_000069.7:110455408
chromosome_03	111451221	T	TCTTTG	C3H	1	CTTTG	NC_000069.7:110806456
chromosome_03	111482670	C	CATCT	C3H	3	ATCT	NC_000069.7:110837849
chromosome_03	111956732	T	TCTTC	C3H	2	TTTCTTTC
chromosome_03	112581856	T	TGATAGATA	C3H	3	ATAG	NC_000069.7:111950077
chromosome_03	113150131	GTGAA	G	C3H	4	TGAA	NC_000069.7:112508614
chromosome_03	114103352	C	CTCTA	C3H	3	TCTA	NC_000069.7:113473912
chromosome_03	114160417	C	CTTTA	C3H	3	TTTA	NC_000069.7:113530966
chromosome_03	115521253	TGATA	T	C3H	1	GATA	NC_000069.7:114912215
chromosome_03	116572924	C	CAAT	C3H	2	ATA	NC_000069.7:115967576
chromosome_03	116666110	T	TTGTG	C3H	1	TG	NC_000069.7:116060689
chromosome_03	117178914	T	TACAC	C3H	2	AC	NC_000069.7:116577239
chromosome_03	117437843	CATCT	C	C3H	2	ATCT	NC_000069.7:116822663
chromosome_03	117859585	T	TTAGA	C3H	3	TAGA	NC_000069.7:117252831
chromosome_03	118259111	A	AACAC	C3H	3	AC	NC_000069.7:117638615
chromosome_03	119073063	CATATT	C	C3H	1	ATATT	NC_000069.7:118455337
chromosome_03	119509702	TTTATTA	T	C3H	3	TTA	NC_000069.7:118891851
chromosome_03	119844869	C	CAGAT	C3H	3	ATAG	NC_000069.7:119227018
chromosome_03	119890112	TGATA	T	C3H	3	GATA	NC_000069.7:119272251
chromosome_03	120684677	T	TTTCC	C3H	4	TTCC	NC_000069.7:120063082
chromosome_03	121130626	AAGAT	A	C3H	4	AGAT	NC_000069.7:120504570
chromosome_03	121222950	A	AGAAG	C3H	3	AAGG	NC_000069.7:120601637
chromosome_03	121543734	AAGAT	A	C3H	2	AGAT	NC_000069.7:120951985
chromosome_03	122039811	C	CATAG	C3H	2	GATA	NC_000069.7:121447725
chromosome_03	123726627	C	CTTCTT	C3H	1	TTCTT	NC_000069.7:123135052
chromosome_03	124644021	CATGT	C	C3H	4	ATGT	NC_000069.7:124110060
chromosome_03	124781189	GCTAT	G	C3H	1	CTAT	NC_000069.7:124250254
chromosome_03	125862294	T	TATAA	C3H	1	ATAA	NC_000069.7:125341732
chromosome_03	126150372	CATCT	C	C3H	3	TATC
chromosome_03	126675793	AAGAT	A	C3H	4	AGAT
chromosome_03	127169726	TTAGA	T	C3H	4	ATAG	NC_000069.7:126630225
chromosome_03	128298560	A	ACTAT	C3H	3	CTAT	NC_000069.7:127729546
chromosome_03	128383449	GTATC	G	C3H	3	TCTA	NC_000069.7:127814612
chromosome_03	128383620	A	ATATC	C3H	4	TCTA	NC_000069.7:127814748
chromosome_03	128384547	ATATC	A	C3H	1	TATC	NC_000069.7:127815540
chromosome_03	128982353	C	CCCTT	C3H	1	TTCCCTTCTTCCTTCCTCCCTTCCTTCCTTCCTTTCTTCCTTTCTTTTTCCCTTCATTC	NC_000069.7:128404215
chromosome_03	130069070	AAAGG	A	C3H	2	AAGA
chromosome_03	130080661	C	CATCT	C3H	2	TCTA	NC_000069.7:129500456
chromosome_03	132357630	C	CTCTA	C3H	1	TCTA	NC_000069.7:131775388
chromosome_03	132768462	GTTTGT	G	C3H	3	TTTTG	NC_000069.7:132186656
chromosome_03	134169245	AACAC	A	C3H	1	AC	NC_000069.7:133586781
chromosome_03	135424342	C	CAGAT	C3H	3	AGAT	NC_000069.7:134834823
chromosome_03	137140942	TG	T	C3H	1		NC_000069.7:136549199
chromosome_03	137318374	A	ACTAT	C3H	1	CTAT	NC_000069.7:136718040
chromosome_03	137744025	T	TTAGA	C3H	2	TAGA	NC_000069.7:137138632
chromosome_03	138405195	TC	T	C3H	3		NC_000069.7:137817737
chromosome_03	138734440	T	TCACA	C3H	3	CA	NC_000069.7:138158197
chromosome_03	141069758	G	GTA	C3H	1	AT	NC_000069.7:140481730
chromosome_03	143674848	T	TTATC	C3H	3	TATC	NC_000069.7:143050999
chromosome_03	143816718	AAAGG	A	C3H	2	AAGG	NC_000069.7:143192915
chromosome_03	144120192	G	GTATC	C3H	2	TATC	NC_000069.7:143485928
chromosome_03	144149115	CAAAT	C	C3H	4	AAAT	NC_000069.7:143514787
chromosome_03	145259630	C	CTCTTT	C3H	2	TTTCT	NC_000069.7:144619763
chromosome_03	145572442	T	TTAAA	C3H	1	TAAA	NC_000069.7:144926440
chromosome_03	147715807	GTTTA	G	C3H	3	TTAT	NC_000069.7:147047893
chromosome_03	148133729	AT	A	C3H	3		NC_000069.7:147460993
chromosome_03	149693729	T	TTTATTA	C3H	1	TTA	NC_000069.7:149014943
chromosome_03	150313286	T	TATAG	C3H	2	ATAG	NC_000069.7:149636841
chromosome_03	151804396	C	CATAG	C3H	3	ATAG	NC_000069.7:151109092
chromosome_03	151919118	A	AAAAT	C3H	2	AAAT	NC_000069.7:151225371
chromosome_03	152237565	CATAG	C	C3H	1	ATAG	NC_000069.7:151529314
chromosome_03	152945871	CCTAT	C	C3H	2	ATCT	NC_000069.7:152239613
chromosome_03	153431086	T	TCA	C3H	2	CA	NC_000069.7:152731406
chromosome_03	153959242	T	TGATA	C3H	1	AGAT	NC_000069.7:153260575
chromosome_03	154761546	ATCC	A	C3H	2		NC_000069.7:154063094
chromosome_03	155949954	TTATC	T	C3H	3	CTAT	NC_000069.7:155236913
chromosome_03	156698419	C	CCTTT	C3H	4	CCTT	NC_000069.7:155976651
chromosome_03	156725572	A	AAAT	C3H	3	AAT	NC_000069.7:156003804
chromosome_03	156779743	A	AGAAG	C3H	1	GAAAGAAGGAAG	NC_000069.7:156057975
chromosome_03	158288709	C	CATAG	C3H	2	ATAG	NC_000069.7:157549492
chromosome_03	159107151	G	GATTT	C3H	1	ATTT	NC_000069.7:158374458
chromosome_03	159845425	C	CAAAT	C3H	2	AAAT	NC_000069.7:159114312
chromosome_04	6076282	GTTCTC	G	C3H	1	TTCTC	NC_000070.7:4574686
chromosome_04	7401705	G	GGAAAA	C3H	4	AAAAG	NC_000070.7:5899192
chromosome_04	7761639	G	GAGAT	C3H	1	AGAT	NC_000070.7:6258998
chromosome_04	8665143	C	CATCT	C3H	3	TCTA
chromosome_04	8990789	TTCTA	T	C3H	2	TCTA	NC_000070.7:7492598
chromosome_04	10679009	AACAC	A	C3H	3	AC	NC_000070.7:9204705
chromosome_04	11569387	G	GGATA	C3H	2	ATAG	NC_000070.7:10099515
chromosome_04	11837342	TGATA	T	C3H	3	GATA	NC_000070.7:10360947
chromosome_04	12011204	T	TGATA	C3H	3	GATA	NC_000070.7:10548527
chromosome_04	13108636	AATCT	A	C3H	3	ATCT	NC_000070.7:11646837
chromosome_04	13856511	ACTTAGAT	A	C3H	3		NC_000070.7:12385503
chromosome_04	14968603	A	AATAG	C3H	3	GATA	NC_000070.7:13516072
chromosome_04	15691107	ATAGG	A	C3H	4	GATA	NC_000070.7:14238406
chromosome_04	17658770	C	CTCTA	C3H	4	TCTA	NC_000070.7:16205181
chromosome_04	17754911	C	CTTTA	C3H	1	TTTA	NC_000070.7:16301297
chromosome_04	20465478	C	CTAA	C3H	4	TAA	NC_000070.7:19028475
chromosome_04	21370478	G	GTTAT	C3H	4	TTAT	NC_000070.7:19936632
chromosome_04	21520148	T	TG	C3H	3	GGT	NC_000070.7:20088079
chromosome_04	21729664	T	TTCTA	C3H	2	TCTA	NC_000070.7:20281677
chromosome_04	23287126	GA	G	C3H	3		NC_000070.7:21836669
chromosome_04	24022370	A	AATCT	C3H	2	ATCT	NC_000070.7:22561839
chromosome_04	25649897	G	GTAGA	C3H	4	TAGA	NC_000070.7:24177257
chromosome_04	26682886	T	TTAAA	C3H	4	TAAA	NC_000070.7:25203511
chromosome_04	26864546	G	GAGAGA	C3H	2	GAGAA	NC_000070.7:25385173
chromosome_04	28216500	AT	A	C3H	3		NC_000070.7:26737188
chromosome_04	28834014	AAATAAT	A	C3H	3	AAT	NC_000070.7:27353067
chromosome_04	28903147	T	TTATC	C3H	4	TATC	NC_000070.7:27422192
chromosome_04	29830150	ATGTGTG	A	C3H	4	TG	NC_000070.7:28349111
chromosome_04	31231509	T	TTATA	C3H	4	TA	NC_000070.7:29743184
chromosome_04	31547770	T	TGAAGA	C3H	3	AGAGG	NC_000070.7:30058828
chromosome_04	32438680	G	GCATA	C3H	1	CATA	NC_000070.7:30959270
chromosome_04	33095876	C	CAGAA	C3H	4	AAGA	NC_000070.7:31616182
chromosome_04	35726815	AAGAT	A	C3H	3	AGAT	NC_000070.7:34242565
chromosome_04	35752260	A	AAAAAT	C3H	4	AAAAT	NC_000070.7:34270823
chromosome_04	35900089	CAATA	C	C3H	2	AATA	NC_000070.7:34428321
chromosome_04	37507927	G	GA	C3H	3		NC_000070.7:36059042
chromosome_04	37904624	T	TTATC	C3H	4	TATC	NC_000070.7:36454276
chromosome_04	39510924	A	ATAT	C3H	1	TAT	NC_000070.7:38060588
chromosome_04	39536176	G	GTCTA	C3H	4	TATC	NC_000070.7:38085840
chromosome_04	41818231	CGTGTGT	C	C3H	4	GT	NC_000070.7:40329324
chromosome_04	45958667	GAGGA	G	C3H	3	AGG	NC_000070.7:45173924
chromosome_04	46049535	AACACACAC	A	C3H	3	AC	NC_000070.7:45262921
chromosome_04	47000731	ATGTG	A	C3H	4	TGTGTGTATGTG
chromosome_04	48135993	CCTCTT	C	C3H	4	TCTCT	NC_000070.7:47370497
chromosome_04	48683048	TTTA	T	C3H	4	TTA	NC_000070.7:47916894
chromosome_04	51561975	T	TATA	C3H	1	AAT	NC_000070.7:50796128
chromosome_04	52336244	TGATA	T	C3H	1	GATA	NC_000070.7:51581501
chromosome_04	53056476	T	TTAGA	C3H	1	TAGA	NC_000070.7:52315915
chromosome_04	53650439	A	AATAG	C3H	3	ATAG	NC_000070.7:52885206
chromosome_04	53688650	T	TATAA	C3H	1	ATAA
chromosome_04	53967134	CTCTA	C	C3H	4	ATCT	NC_000070.7:53208389
chromosome_04	55321676	GAGAA	G	C3H	3	AG	NC_000070.7:54575379
chromosome_04	55815317	T	TGATA	C3H	3	GATA	NC_000070.7:55085075
chromosome_04	56501898	GCCTT	G	C3H	4	CCTT	NC_000070.7:55765190
chromosome_04	58499915	G	GCACA	C3H	4	CA	NC_000070.7:57764838
chromosome_04	58598701	G	GTCTA	C3H	2	TCTA	NC_000070.7:57863146
chromosome_04	63151261	T	TTAGATAGA	C3H	1	AGAT	NC_000070.7:63250943
chromosome_04	63151339	TATAG	T	C3H	3	AGAT	NC_000070.7:63251025
chromosome_04	63745703	C	CTG	C3H	1	TG	NC_000070.7:63840902
chromosome_04	64080915	G	GTATC	C3H	1	TATG	NC_000070.7:64176062
chromosome_04	64485573	TTATC	T	C3H	2	TCTA	NC_000070.7:64580560
chromosome_04	66065217	A	AAATAAT	C3H	2	AAT	NC_000070.7:66158733
chromosome_04	66373460	CTAA	C	C3H	1	TAA	NC_000070.7:66466445
chromosome_04	68473204	CTCTA	C	C3H	2	TCTA	NC_000070.7:68565993
chromosome_04	69185233	G	GTAGA	C3H	1	ATAG	NC_000070.7:69277874
chromosome_04	69917933	A	AATGG	C3H	4	ATGG	NC_000070.7:70010307
chromosome_04	70023430	CTG	C	C3H	4		NC_000070.7:70115791
chromosome_04	72252576	AT	A	C3H	1		NC_000070.7:72344753
chromosome_04	72945274	GATAGAT	G	C3H	4	ATAG	NC_000070.7:73036935
chromosome_04	73196266	T	TTA	C3H	4	TA	NC_000070.7:73295853
chromosome_04	73387699	GATAA	G	C3H	4	AATA	NC_000070.7:73487269
chromosome_04	73595789	G	GTAGA	C3H	2	TAGA	NC_000070.7:73695335
chromosome_04	76521506	A	ACTAT	C3H	2	TATC	NC_000070.7:76619841
chromosome_04	78086706	GTCTATC	G	C3H	4	TCTATC	NC_000070.7:78184426
chromosome_04	78920219	G	GTCTA	C3H	3	CTAT	NC_000070.7:79023066
chromosome_04	79308164	C	CT	C3H	3	CTTTT	NC_000070.7:79410994
chromosome_04	80592816	A	AAAGG	C3H	4	GGAA	NC_000070.7:80694885
chromosome_04	80612617	C	CGTGT	C3H	2	GTGCGTGC	NC_000070.7:80714677
chromosome_04	81325706	A	AATTT	C3H	4	ATTT	NC_000070.7:81427466
chromosome_04	82400599	G	GTCTA	C3H	4	TCTA	NC_000070.7:82501963
chromosome_04	85208060	ATATC	A	C3H	1	TATC	NC_000070.7:85306534
chromosome_04	86152343	TGATA	T	C3H	3	TAGA	NC_000070.7:86250195
chromosome_04	86818962	T	TTATC	C3H	2	TATC	NC_000070.7:86900066
chromosome_04	86838003	C	CCTAT	C3H	1	CTAT	NC_000070.7:86919060
chromosome_04	87399720	C	CCTAT	C3H	4	ATCT	NC_000070.7:87439144
chromosome_04	87575597	G	GAGAT	C3H	3	ATAG	NC_000070.7:87615045
chromosome_04	87776476	TTAGA	T	C3H	3	TAGA	NC_000070.7:87820125
chromosome_04	89078669	TA	T	C3H	3		NC_000070.7:89111707
chromosome_04	89433574	T	TCTTC	C3H	1	TTCC
chromosome_04	89455116	C	CATCT	C3H	2	ATCT	NC_000070.7:89470990
chromosome_04	89468885	C	CTCCT	C3H	3	CCTT
chromosome_04	89743791	T	TTCTA	C3H	2	TCTA	NC_000070.7:89783513
chromosome_04	91747937	G	GTCTA	C3H	2	TCTA	NC_000070.7:91776415
chromosome_04	91934030	C	CAACAA	C3H	1	AAAAC	NC_000070.7:91962496
chromosome_04	92323276	CAGAT	C	C3H	1	AGAT	NC_000070.7:92350560
chromosome_04	92506517	GA	G	C3H	2		NC_000070.7:92533700
chromosome_04	93921873	GTAGA	G	C3H	3	ATAG	NC_000070.7:93976027
chromosome_04	94495287	T	TATAGA	C3H	1	ATAGA	NC_000070.7:94553078
chromosome_04	100021803	A	ATG	C3H	2	TG	NC_000070.7:100078443
chromosome_04	102289250	TGATA	T	C3H	3	TAGA	NC_000070.7:102318123
chromosome_04	104130011	T	TATAG	C3H	2	ATAG	NC_000070.7:104157266
chromosome_04	104590402	G	GTAGA	C3H	2	GATA	NC_000070.7:104617044
chromosome_04	104607651	TC	T	C3H	4	TTCCTTGC	NC_000070.7:104634206
chromosome_04	104939592	CAGAT	C	C3H	4	AGAT	NC_000070.7:104973527
chromosome_04	105121066	TTATC	T	C3H	2	TCTA	NC_000070.7:105147939
chromosome_04	105402218	C	CTCTA	C3H	1	TCTA	NC_000070.7:105441137
chromosome_04	105426958	GGGAA	G	C3H	3	GGAA	NC_000070.7:105468977
chromosome_04	105849308	T	TGATA	C3H	4	GATA	NC_000070.7:105887923
chromosome_04	106115961	GAGAT	G	C3H	4	AGAT	NC_000070.7:106138209
chromosome_04	106560393	TTAGA	T	C3H	2	TAGA	NC_000070.7:106582950
chromosome_04	106943339	GTGTGTC	G	C3H	2	GTCTGT	NC_000070.7:106966346
chromosome_04	107129026	GGATA	G	C3H	3	AGAT	NC_000070.7:107150562
chromosome_04	110147223	A	AAAAT	C3H	3	AAAT	NC_000070.7:110191643
chromosome_04	111454858	GTTTA	G	C3H	2	TTTA
chromosome_04	112983017	TTATG	T	C3H	1	TATG	NC_000070.7:114231358
chromosome_04	113013687	C	CCTCCTT	C3H	3	CCT
chromosome_04	113034324	G	GAGGA	C3H	2	AGGA	NC_000070.7:114282669
chromosome_04	114246478	T	TGATA	C3H	4	AGAT
chromosome_04	115160075	ATAT	A	C3H	2	TTA	NC_000070.7:116391183
chromosome_04	115398987	CCCTT	C	C3H	3	TTCC
chromosome_04	118024807	CATCT	C	C3H	2	TATC	NC_000070.7:119239861
chromosome_04	120017628	T	TTATC	C3H	2	TATC	NC_000070.7:121260332
chromosome_04	120686039	A	AAGAT	C3H	4	AGAT	NC_000070.7:122709515
chromosome_04	122033516	G	GTAGA	C3H	3	ATAG	NC_000070.7:124049249
chromosome_04	123817761	C	CATGA	C3H	1		NC_000070.7:125837923
chromosome_04	124610049	T	TAC	C3H	1	AC	NC_000070.7:126625578
chromosome_04	124733681	ATATT	A	C3H	1	TATT	NC_000070.7:126749192
chromosome_04	125148363	T	TTCTA	C3H	3	TCTA
chromosome_04	126889455	T	TTAGA	C3H	3	TAGA	NC_000070.7:128908885
chromosome_04	130095294	G	GTTAT	C3H	4	TTAT	NC_000070.7:132111647
chromosome_04	130095354	GTTAT	G	C3H	2	TTAT	NC_000070.7:132111707
chromosome_04	131043117	A	AAAAT	C3H	2	AAAT	NC_000070.7:133065984
chromosome_04	131349332	CCACACACACACACA	C	C3H	4	CA	NC_000070.7:133370441
chromosome_04	132287770	TCCAC	T	C3H	3	CATC
chromosome_04	134519051	G	GAC	C3H	3	CA	NC_000070.7:136537923
chromosome_04	135684032	A	AATAG	C3H	2	ATAG	NC_000070.7:137695987
chromosome_04	137931001	GGATA	G	C3H	3	TGGA	NC_000070.7:139944746
chromosome_04	138227175	GGAAT	G	C3H	3	GAAT	NC_000070.7:140240852
chromosome_04	138463566	CTCAA	C	C3H	1	TCAA	NC_000070.7:140471587
chromosome_04	139552815	G	GTCTA	C3H	1	TCTA
chromosome_04	139767241	GTCTA	G	C3H	4	TCTA
chromosome_04	140025977	A	AGT	C3H	2	GT	NC_000070.7:142031970
chromosome_04	140270968	CTCTA	C	C3H	4	TCTA	NC_000070.7:142280001
chromosome_04	140271069	CATCT	C	C3H	1	TCTA	NC_000070.7:142280089
chromosome_04	140316262	G	GCA	C3H	2		NC_000070.7:142325462
chromosome_04	140320860	GTCTA	G	C3H	1	CTAT
chromosome_04	141720340	TTATC	T	C3H	3	TATC	NC_000070.7:143742825
chromosome_04	142402307	TATAA	T	C3H	4	ATAA	NC_000070.7:144447586
chromosome_04	146546029	A	AATAG	C3H	1	ATAG	NC_000070.7:148374043
chromosome_04	146783512	A	AAAAT	C3H	4	AAAT	NC_000070.7:148605154
chromosome_04	148272470	TTTCC	T	C3H	1	TTCC	NC_000070.7:150089067
chromosome_04	148456400	AGTGTGTGTGT	A	C3H	2	GT	NC_000070.7:150273302
chromosome_04	148478610	C	CATTT	C3H	3	ATTT	NC_000070.7:150295459
chromosome_04	149081681	A	ATG	C3H	2	TGCATGTGTG	NC_000070.7:150900529
chromosome_04	150070359	G	GGGAA	C3H	2	GGAA	NC_000070.7:151887176
chromosome_04	151345150	C	CAGAAGA	C3H	4	AGA	NC_000070.7:153157957
chromosome_04	151393618	G	GTAA	C3H	1	TAA	NC_000070.7:153206421
chromosome_04	153149717	A	AAAGG	C3H	2	GGAA	NC_000070.7:154957469
chromosome_05	4706318	TTATC	T	C3H	4	TATC	NC_000071.7:4340866
chromosome_05	4901428	G	GAAGA	C3H	1	AAGA	NC_000071.7:4535463
chromosome_05	6491367	C	CTTTTG	C3H	3	TTTTG	NC_000071.7:6103623
chromosome_05	6830268	T	TATATC	C3H	2	ATATCATATCATATC	NC_000071.7:6442444
chromosome_05	7513664	T	TTTA	C3H	4	TTA	NC_000071.7:7114510
chromosome_05	10075968	TCTTC	T	C3H	3	CTTC	NC_000071.7:9681124
chromosome_05	10097501	A	ATATC	C3H	4	TATC	NC_000071.7:9702659
chromosome_05	10218095	GCTAT	G	C3H	4	CTAT	NC_000071.7:9823246
chromosome_05	11407316	AT	A	C3H	2		NC_000071.7:11011879
chromosome_05	14345038	TATAG	T	C3H	1	TAGA	NC_000071.7:13957779
chromosome_05	16178823	T	TTTA	C3H	3	TTA
chromosome_05	19077837	GGATA	G	C3H	3	GATAGAT	NC_000071.7:16041179
chromosome_05	19618646	TGATA	T	C3H	3	GATA	NC_000071.7:16581964
chromosome_05	19976154	ATATC	A	C3H	2	TATC	NC_000071.7:16938933
chromosome_05	20638332	T	TTAA	C3H	2	TAA	NC_000071.7:17594631
chromosome_05	20716774	C	CCTTT	C3H	2	TTCT	NC_000071.7:17673064
chromosome_05	21369586	T	TAAAGA	C3H	1	AAAGA	NC_000071.7:18325796
chromosome_05	23355939	TTG	T	C3H	1	TG	NC_000071.7:20311227
chromosome_05	25103931	C	CTCCT	C3H	3	TCCT	NC_000071.7:22047973
chromosome_05	26121458	TTCTTTC	T	C3H	4	TCTTTC	NC_000071.7:23067636
chromosome_05	26344967	CAAAT	C	C3H	3	AAAT	NC_000071.7:23290959
chromosome_05	27053336	A	AATGT	C3H	2	TGTA	NC_000071.7:23997165
chromosome_05	27410240	AAG	A	C3H	4	AAAAGGAAAGG	NC_000071.7:24353595
chromosome_05	27440835	T	TATAA	C3H	3	ATAA	NC_000071.7:24384194
chromosome_05	28120003	C	CCTAT	C3H	3	ATCT	NC_000071.7:25070485
chromosome_05	28961746	G	GTATC	C3H	4	TATG	NC_000071.7:25916833
chromosome_05	31866133	CATCT	C	C3H	4	TCTA	NC_000071.7:28725572
chromosome_05	32345687	GGGAA	G	C3H	1	GGAG	NC_000071.7:29209772
chromosome_05	32500022	A	AATAG	C3H	3	ATAG	NC_000071.7:29364105
chromosome_05	33766253	GGATA	G	C3H	2	ATAG	NC_000071.7:30621207
chromosome_05	34351467	A	ACTAT	C3H	1	CTAT	NC_000071.7:31206429
chromosome_05	34443451	C	CATCT	C3H	4	ATCT	NC_000071.7:31299902
chromosome_05	34558408	C	CAT	C3H	2	TA	NC_000071.7:31414478
chromosome_05	35982639	G	GTAGA	C3H	1	TAGA	NC_000071.7:32847205
chromosome_05	36856847	T	TTAAA	C3H	1	TAAA	NC_000071.7:33719723
chromosome_05	40333026	AATAAT	A	C3H	4	ATAAT	NC_000071.7:37225768
chromosome_05	41241239	TTAA	T	C3H	3	TAA	NC_000071.7:38135282
chromosome_05	41771625	AAT	A	C3H	4	AT	NC_000071.7:38680026
chromosome_05	42120477	A	AATCT	C3H	1	ATCT	NC_000071.7:39028682
chromosome_05	43194704	G	GGATA	C3H	2	TAGA	NC_000071.7:40093436
chromosome_05	43345510	A	AAAGAAATTAGAAACTTGCAG	C3H	3
chromosome_05	44581578	C	CAGAAA	C3H	2	AAAAG	NC_000071.7:41486203
chromosome_05	45717829	GTCTA	G	C3H	1	TCTG	NC_000071.7:42715706
chromosome_05	46127340	TC	T	C3H	1		NC_000071.7:43125204
chromosome_05	46613962	TTTA	T	C3H	1	TTA	NC_000071.7:43618442
chromosome_05	47591241	T	TTATC	C3H	4	TATC	NC_000071.7:44591939
chromosome_05	47973878	G	GTGTT	C3H	4	TTGTT	NC_000071.7:44962889
chromosome_05	49238133	GTCTA	G	C3H	3	TCTA
chromosome_05	49272463	T	TTTTA	C3H	2	TTTA	NC_000071.7:46280099
chromosome_05	49492731	T	TTATC	C3H	2	ATCT	NC_000071.7:46503374
chromosome_05	50253006	C	CATAG	C3H	1	ATAG	NC_000071.7:47250576
chromosome_05	51883857	TTTATTA	T	C3H	2	TTA	NC_000071.7:48876723
chromosome_05	53823334	CATCT	C	C3H	2	ATCT	NC_000071.7:50825071
chromosome_05	54224514	GTAGA	G	C3H	2	ATAG	NC_000071.7:51226215
chromosome_05	54935254	C	CA	C3H	1	CAAAAA	NC_000071.7:51936256
chromosome_05	55078930	A	AAAAT	C3H	1	AAAT	NC_000071.7:52079907
chromosome_05	55507782	T	TCATA	C3H	2	CATA	NC_000071.7:52508740
chromosome_05	56758700	TTTCC	T	C3H	2	TTCC	NC_000071.7:53735641
chromosome_05	57917633	CATCT	C	C3H	2	CTAT	NC_000071.7:54903356
chromosome_05	59337171	AATCT	A	C3H	2	ATCT	NC_000071.7:56323333
chromosome_05	61471078	A	ATATC	C3H	4	TATC	NC_000071.7:58429517
chromosome_05	62324428	G	GATAGAT	C3H	3	ATATAG
chromosome_05	66162145	T	TCTTC	C3H	4	CCTT	NC_000071.7:63141765
chromosome_05	68736481	GTTTA	G	C3H	2	TTTA	NC_000071.7:65685566
chromosome_05	70087138	C	CAT	C3H	3	AT	NC_000071.7:67029733
chromosome_05	72992025	TTTA	T	C3H	1	TTA	NC_000071.7:69950688
chromosome_05	74093270	A	AGAGG	C3H	4	GAGG	NC_000071.7:71050680
chromosome_05	74158185	C	CATAG	C3H	4	ATAG	NC_000071.7:71115583
chromosome_05	74508080	CATCT	C	C3H	1	ATCT	NC_000071.7:71465433
chromosome_05	74539216	C	CGATA	C3H	1	GATA	NC_000071.7:71496560
chromosome_05	75202306	G	GGATA	C3H	2	TAGA	NC_000071.7:72164426
chromosome_05	75872792	T	TGATA	C3H	2	TAGA	NC_000071.7:72843611
chromosome_05	76841548	TTTA	T	C3H	2	TTA	NC_000071.7:73784714
chromosome_05	79359016	G	GT	C3H	3		NC_000071.7:76313008
chromosome_05	79375093	GTATT	G	C3H	4	TATT	NC_000071.7:76329048
chromosome_05	80904489	AATCTATCT	A	C3H	4	ATCT	NC_000071.7:77864406
chromosome_05	80908453	CTCTA	C	C3H	2	ATCT	NC_000071.7:77868350
chromosome_05	80988935	G	GTATC	C3H	1	TATC	NC_000071.7:77948765
chromosome_05	81511528	G	GA	C3H	1		NC_000071.7:78470742
chromosome_05	81717963	A	AT	C3H	4		NC_000071.7:78676507
chromosome_05	82966662	A	ATATC	C3H	1	TATC	NC_000071.7:79901248
chromosome_05	83405099	C	CGT	C3H	1		NC_000071.7:80347046
chromosome_05	84112288	C	CAT	C3H	1	AT	NC_000071.7:81054240
chromosome_05	84445943	A	AATAG	C3H	1	ATAG	NC_000071.7:81387820
chromosome_05	86332286	ATATT	A	C3H	3	TATT	NC_000071.7:83293393
chromosome_05	86841084	C	CAT	C3H	4	ATATATATATACAT	NC_000071.7:83812295
chromosome_05	87337052	TGATA	T	C3H	1	TAGA	NC_000071.7:84309397
chromosome_05	88295006	T	TAATA	C3H	2	AATA	NC_000071.7:85265273
chromosome_05	88591626	GT	G	C3H	4	T	NC_000071.7:85564595
chromosome_05	88725641	CTAGA	C	C3H	3	TAGA	NC_000071.7:85698614
chromosome_05	88765497	TA	T	C3H	4		NC_000071.7:85738450
chromosome_05	89543791	C	CATCT	C3H	1	TATC	NC_000071.7:86500045
chromosome_05	89772915	T	TTAGA	C3H	2	ATAG	NC_000071.7:86740880
chromosome_05	90222837	T	TCAAA	C3H	1	CAAA	NC_000071.7:87198256
chromosome_05	93596015	C	CATCT	C3H	2	ATCT	NC_000071.7:90552968
chromosome_05	94206231	A	AAGAT	C3H	4	AGAT	NC_000071.7:91173747
chromosome_05	98811721	AATAG	A	C3H	3	GATA	NC_000071.7:96126856
chromosome_05	99950755	TTATC	T	C3H	3	TATC	NC_000071.7:97264798
chromosome_05	100476673	CATCT	C	C3H	2	ATCT	NC_000071.7:97779175
chromosome_05	100758266	TGATA	T	C3H	3	ATAG
chromosome_05	102735401	TGATA	T	C3H	1	GATA	NC_000071.7:100047566
chromosome_05	103327522	CAAAAAAAAAAAAAAAA	C	C3H	1	A	NC_000071.7:100617156
chromosome_05	103900089	CTCTA	C	C3H	4	TATC	NC_000071.7:101190258
chromosome_05	104009387	G	GTTCC	C3H	4	TTCC	NC_000071.7:101299595
chromosome_05	104297450	T	TCATATA	C3H	4	ATACAT
chromosome_05	104497350	TGATA	T	C3H	3	GATA	NC_000071.7:101785539
chromosome_05	104497621	GTAGA	G	C3H	2	GATA	NC_000071.7:101785814
chromosome_05	105431978	AAAAT	A	C3H	3	AAAT	NC_000071.7:102718311
chromosome_05	106254791	GTAGA	G	C3H	4	TAGA	NC_000071.7:103551323
chromosome_05	109013131	G	GACATA	C3H	4	TAACA	NC_000071.7:106485692
chromosome_05	109032581	G	GCA	C3H	2	CA	NC_000071.7:106505075
chromosome_05	109626180	C	CTGTCTG	C3H	1	TGTCTG	NC_000071.7:107093178
chromosome_05	109711758	TTACA	T	C3H	3	TACA	NC_000071.7:107174488
chromosome_05	109847731	A	ATGTG	C3H	1	TG	NC_000071.7:107309967
chromosome_05	109999250	TTATC	T	C3H	2	TATC	NC_000071.7:107463623
chromosome_05	110445691	C	CATAG	C3H	4	ATAG	NC_000071.7:107908273
chromosome_05	110480402	CAAT	C	C3H	2	AAT	NC_000071.7:107942983
chromosome_05	113014998	A	AAAT	C3H	3	AAT	NC_000071.7:110495816
chromosome_05	114195958	C	CATCT	C3H	1	ATCT	NC_000071.7:111671526
chromosome_05	116252072	G	GAGAT	C3H	1	AGAT	NC_000071.7:113740084
chromosome_05	117880160	AATAG	A	C3H	3	ATAG	NC_000071.7:115357581
chromosome_05	118913478	GTTTA	G	C3H	3	TTTA	NC_000071.7:116392668
chromosome_05	119832609	AATAG	A	C3H	4	AGAT	NC_000071.7:117310842
chromosome_05	119920042	C	CAGAT	C3H	3	AGAT	NC_000071.7:117398262
chromosome_05	120974968	G	GGATA	C3H	4	GATA	NC_000071.7:118453225
chromosome_05	122054125	GTGGA	G	C3H	1	ATGG	NC_000071.7:119534687
chromosome_05	122533438	CCCAT	C	C3H	4	ATCC	NC_000071.7:120015101
chromosome_05	122766084	T	TACACAC	C3H	3	AC	NC_000071.7:120252167
chromosome_05	123059568	G	GTAGA	C3H	1	AGAT	NC_000071.7:120545337
chromosome_05	124195317	T	TTTTA	C3H	3	CGGCTCATACACATAAAACGCATCAGTAATCTAAAGTAAGAGAGAAGCAGATCTACGAGGTCAGGCCCGACATATACTTGTTATTTATTTATTTATTTATTTATTTATTTATTTATTTATTTATTTATTTATTATATGTAAGTACACTGTAGCTGTCTTCAGATGCACCAGAAGAGGGCATCAGATCTCATTACAGATGGTTGTGAGCCACCATGTGGTTGCTGGGATTTGAACTTCGGACCTTCGGAAGAGCAGTCGGGTGCTCTTACCCACTGAG
chromosome_05	125026803	CGTGTGTGT	C	C3H	3	GT	NC_000071.7:122504314
chromosome_05	125253025	G	GTTTA	C3H	2	ATTT	NC_000071.7:122730526
chromosome_05	126690721	AGAATGTGT	A	C3H	4		NC_000071.7:124188754
chromosome_05	127326140	A	ATG	C3H	1	TGTGTGTGTGTGTGTGTG	NC_000071.7:124823854
chromosome_05	127336152	G	GATTT	C3H	4	ATTT	NC_000071.7:124833859
chromosome_05	128179702	G	GTCTA	C3H	3	ATCT	NC_000071.7:125675924
chromosome_05	128237505	GATTTT	G	C3H	2	ATTTT	NC_000071.7:125733636
chromosome_05	129805236	TTAA	T	C3H	4	TAA	NC_000071.7:127302318
chromosome_05	129990401	T	TTAA	C3H	2	TAA	NC_000071.7:127487187
chromosome_05	130075436	CGATA	C	C3H	3	GATA	NC_000071.7:127572255
chromosome_05	130589816	C	CATCT	C3H	3	TATC	NC_000071.7:128101060
chromosome_05	130921883	A	AAAGG	C3H	1	AAGGAAAG	NC_000071.7:128429775
chromosome_05	131653415	AATCT	A	C3H	3	TATC	NC_000071.7:129164454
chromosome_05	131942914	G	GAGAT	C3H	3	AGAT	NC_000071.7:129453245
chromosome_05	132899219	AATCT	A	C3H	1	TCTATATTCTTTATCTATACCTGTAATCTATATCTGTCTATCTTCTGTCTATCTATCTATCTATCTATCTATCTATCTATCTATGCCTATAATCTATATCTATAATATATAATCCATACCTAAAATCTATCTATATCTATATATCTATAATCTATAACTATACCTACTCTCTATATATATAATCTATGCCTATATCCATAATCTATATCTATACCTATAATCTATATCTATAACCTATATCTATGTCTCCA	NC_000071.7:130408708
chromosome_05	133951584	GAGAT	G	C3H	2	GATA	NC_000071.7:131460379
chromosome_05	134755492	A	AAT	C3H	4		NC_000071.7:132270913
chromosome_05	136439928	AATAG	A	C3H	3	AGAT	NC_000071.7:133957275
chromosome_05	136519477	GAGAA	G	C3H	3	GAAA	NC_000071.7:134036806
chromosome_05	137997692	A	AGAAG	C3H	1	AAGG	NC_000071.7:135511727
chromosome_05	138909824	C	CCCTTT	C3H	3	CCTTT	NC_000071.7:136426422
chromosome_05	139355122	T	TAAGG	C3H	1	AAGG	NC_000071.7:136876583
chromosome_05	139361807	G	GAGAC	C3H	2	AGAC	NC_000071.7:136883283
chromosome_05	139822195	AATAG	A	C3H	4	ATAG	NC_000071.7:137336465
chromosome_05	141573539	A	AAGAT	C3H	4	ATAG	NC_000071.7:138895961
chromosome_05	142334178	G	GGATA	C3H	4	TAGA	NC_000071.7:139656910
chromosome_05	143517123	TTATC	T	C3H	4	TATC	NC_000071.7:140833949
chromosome_05	144706491	CGGAA	C	C3H	2	GGAA	NC_000071.7:142010555
chromosome_05	144951293	TG	T	C3H	2		NC_000071.7:142254760
chromosome_05	145279958	G	GGATA	C3H	2	AGAT	NC_000071.7:142577661
chromosome_05	145468366	CCCTT	C	C3H	1	CTCC	NC_000071.7:142765288
chromosome_05	146343239	G	GTTTCC	C3H	2	TTTCC	NC_000071.7:143639694
chromosome_05	148472930	A	AAGG	C3H	1	GAGAAG	NC_000071.7:145679084
chromosome_05	150578274	AGTT	A	C3H	1	GTT	NC_000071.7:147665926
chromosome_05	151971108	CCTTT	C	C3H	1	TCCT	NC_000071.7:149034586
chromosome_05	152937811	TATAC	T	C3H	4	ATAC	NC_000071.7:149994108
chromosome_05	153071054	C	CAT	C3H	2	AT	NC_000071.7:150127404
chromosome_05	153314551	AGAAG	A	C3H	2	GAAG	NC_000071.7:150362577
chromosome_05	153601544	GTGTA	G	C3H	4	TGTA	NC_000071.7:150651687
chromosome_05	154199086	CT	C	C3H	1		NC_000071.7:151249216
chromosome_06	7678253	GTTCA	G	C3H	3	TTCA	NC_000072.7:4152097
chromosome_06	8256244	A	AGAAG	C3H	3	AAGG	NC_000072.7:4729064
chromosome_06	8532835	ATATCTATC	A	C3H	4	TATATC	NC_000072.7:5002341
chromosome_06	10892207	G	GAGGA	C3H	4	AGGA	NC_000072.7:7346419
chromosome_06	12584851	CATCT	C	C3H	4	CTAT	NC_000072.7:9049541
chromosome_06	13428426	TTTA	T	C3H	3	TTA	NC_000072.7:9892747
chromosome_06	15018972	G	GTAGA	C3H	3	TAGA	NC_000072.7:11488268
chromosome_06	17278628	CTTAT	C	C3H	1	TATTTATTTATTTATTTATTTATTTATTTATTTATTTATTGAAAAGAAAGCCAGTAAGATCCAAAAAAAATTTTGGTTGGGGAAAATAAAAGACCTTATTTATT	NC_000072.7:13748605
chromosome_06	17590671	G	GTCTA	C3H	3	TATC	NC_000072.7:14065194
chromosome_06	18065368	A	ATC	C3H	4		NC_000072.7:14512633
chromosome_06	18128979	G	GAACT	C3H	4		NC_000072.7:14576370
chromosome_06	18645373	TGATA	T	C3H	4	TAGA	NC_000072.7:15100154
chromosome_06	19688175	G	GTCTA	C3H	2	TCTA	NC_000072.7:16135322
chromosome_06	19711312	TAGATAG	T	C3H	3	TAGATA	NC_000072.7:16158428
chromosome_06	19923446	TATAG	T	C3H	4	ATAG	NC_000072.7:16370492
chromosome_06	22587251	T	TTATC	C3H	3	CTAT	NC_000072.7:19022704
chromosome_06	23126385	G	GA	C3H	1		NC_000072.7:19561818
chromosome_06	24006051	A	ATATT	C3H	2	TATT	NC_000072.7:20441456
chromosome_06	24609149	CCTTTT	C	C3H	2	TCTTT	NC_000072.7:21044489
chromosome_06	30344607	CCTAT	C	C3H	1	CTAT	NC_000072.7:26646460
chromosome_06	30865565	C	CTTTA	C3H	3	TTTA	NC_000072.7:27167360
chromosome_06	32837494	TACACAC	T	C3H	1	AC	NC_000072.7:29140212
chromosome_06	33740390	A	ATATC	C3H	4	TATC	NC_000072.7:30044386
chromosome_06	34680436	GT	G	C3H	2	TTATT	NC_000072.7:30985596
chromosome_06	35898712	C	CATCT	C3H	3	TATC	NC_000072.7:32202420
chromosome_06	36524155	TTATC	T	C3H	2	CTAT	NC_000072.7:32819091
chromosome_06	37071761	CTCTA	C	C3H	3	TATCTATC	NC_000072.7:33367158
chromosome_06	37683879	AG	A	C3H	1		NC_000072.7:33979019
chromosome_06	38214097	TTCTTC	T	C3H	2	TCTTC	NC_000072.7:34511432
chromosome_06	39023660	TTATC	T	C3H	4	TATC	NC_000072.7:35328583
chromosome_06	39357680	CCCTT	C	C3H	1	CCTT	NC_000072.7:35667731
chromosome_06	45193809	A	AATAG	C3H	1	ATAG	NC_000072.7:41507240
chromosome_06	47417864	T	TCTATA	C3H	1	CTATA	NC_000072.7:43729675
chromosome_06	48627138	G	GAGGA	C3H	1	GAGG	NC_000072.7:44939659
chromosome_06	52467188	T	TTTCC	C3H	1	TTCC
chromosome_06	52566604	TTGA	T	C3H	1		NC_000072.7:48619926
chromosome_06	55076115	G	GTAGA	C3H	1	ATAG	NC_000072.7:51116183
chromosome_06	55678624	TTCTA	T	C3H	2	TCTA	NC_000072.7:51717936
chromosome_06	55978846	C	CAAAT	C3H	4	AAAT	NC_000072.7:52017856
chromosome_06	56080928	GTAGA	G	C3H	3	TAGA
chromosome_06	57607378	C	CAATA	C3H	3	AATA	NC_000072.7:53646620
chromosome_06	58600418	T	TGATA	C3H	4	AGAT	NC_000072.7:54638421
chromosome_06	61038917	T	TTTATA	C3H	1	TTATA
chromosome_06	62130035	A	AGTAT	C3H	3	TGTA	NC_000072.7:58167981
chromosome_06	62306828	T	TAATA	C3H	1	AATA	NC_000072.7:58344715
chromosome_06	63482211	G	GT	C3H	1		NC_000072.7:59518579
chromosome_06	63584397	GGCA	G	C3H	1	GGTTCCGGGACTCCGCAGAAAGTAGTCTGCACAGGCGAGAGTGTGGACTACAGAAGCTAACAGCTTCTGGGACAGGCGAGAGCCACAGAGCTTCTGAGGCAGCACCGTTTTCAGGCTCCAGACATCCGGCCACCTTCCCGGCCAGAGGACAGGGGTCCACCCGGCCCGGGAGGCTTCCTCAGGATCCGCGGAGCCATCTT	NC_000072.7:59620769
chromosome_06	63806381	C	CAATA	C3H	4	AATA	NC_000072.7:59842756
chromosome_06	65656279	A	AAAAAG	C3H	1	AAAAG	NC_000072.7:61691362
chromosome_06	67655766	G	GATGTT	C3H	2	ATGTT	NC_000072.7:63699028
chromosome_06	69434239	GAGACA	G	C3H	3	AGACA	NC_000072.7:65487153
chromosome_06	70595657	G	GTATA	C3H	1	AT	NC_000072.7:66654203
chromosome_06	70814031	TTCCCTCCC	T	C3H	3	TCCT	NC_000072.7:66872567
chromosome_06	71825568	G	GTAA	C3H	4	TAA	NC_000072.7:67882846
chromosome_06	72053519	A	AT	C3H	4		NC_000072.7:68110590
chromosome_06	73507103	G	GTAGA	C3H	1	TAGA	NC_000072.7:69563576
chromosome_06	73601216	A	AATAG	C3H	4	ATAG	NC_000072.7:69657692
chromosome_06	73743287	T	TAATA	C3H	1	AATA	NC_000072.7:69799756
chromosome_06	74271891	TAATA	T	C3H	1	AATA	NC_000072.7:70328321
chromosome_06	76955304	CTAT	C	C3H	1	TAT	NC_000072.7:72977895
chromosome_06	77378506	C	CCTAT	C3H	4	TCTA	NC_000072.7:73416062
chromosome_06	77472805	TTATC	T	C3H	4	ATCT
chromosome_06	78959087	A	AAAAT	C3H	2	AAAT	NC_000072.7:75016701
chromosome_06	81645752	AAAT	A	C3H	2	AAT	NC_000072.7:77697355
chromosome_06	81799452	T	TTAGA	C3H	2	ATAG	NC_000072.7:77851044
chromosome_06	83582058	TTTTA	T	C3H	3	TTTA	NC_000072.7:79633241
chromosome_06	84326998	CA	C	C3H	2		NC_000072.7:80377770
chromosome_06	84456899	T	TACAC	C3H	4	CA	NC_000072.7:80507041
chromosome_06	84671967	GATGT	G	C3H	1	ATGT	NC_000072.7:80722073
chromosome_06	85111418	A	AAGAT	C3H	4	AGAT	NC_000072.7:81160963
chromosome_06	86467346	G	GGTGT	C3H	4	GT	NC_000072.7:82516570
chromosome_06	86923505	GTCT	G	C3H	4	TCT	NC_000072.7:82972594
chromosome_06	87501308	C	CGTGT	C3H	2	GT	NC_000072.7:83550221
chromosome_06	88007687	CATCT	C	C3H	3	ATCT	NC_000072.7:84056582
chromosome_06	88565742	A	ATATC	C3H	1	TATC	NC_000072.7:84613474
chromosome_06	88892120	C	CAGAT	C3H	2	AGAT	NC_000072.7:84939549
chromosome_06	88968578	A	ATATAT	C3H	1	TATTA	NC_000072.7:85016002
chromosome_06	89641503	TTTTTC	T	C3H	3	TCTTT	NC_000072.7:85688659
chromosome_06	90205789	A	AATAG	C3H	4	ATAG	NC_000072.7:86259498
chromosome_06	91507324	AAATAAT	A	C3H	2	AAT	NC_000072.7:87554857
chromosome_06	91859786	T	TTTCC	C3H	3	TTTC	NC_000072.7:87905103
chromosome_06	92100597	G	GC	C3H	1		NC_000072.7:88145816
chromosome_06	93425411	T	TTAA	C3H	2	TAA	NC_000072.7:89492451
chromosome_06	93514656	G	GCA	C3H	4	CA	NC_000072.7:89581696
chromosome_06	94162339	GA	G	C3H	3		NC_000072.7:90228109
chromosome_06	94863667	G	GAGAT	C3H	2	AGAT	NC_000072.7:90927082
chromosome_06	96827377	TTTCC	T	C3H	2	TTCC	NC_000072.7:92876931
chromosome_06	97012857	AAAAAC	A	C3H	1	AAAAC	NC_000072.7:93056225
chromosome_06	97227185	T	TTTAG	C3H	2	TTAG	NC_000072.7:93271433
chromosome_06	97632582	C	CATCTATCT	C3H	4	TATC	NC_000072.7:93669116
chromosome_06	97655198	CTTAT	C	C3H	2	TTAT	NC_000072.7:93691714
chromosome_06	97962024	A	AAGAT	C3H	4	GATA	NC_000072.7:93993272
chromosome_06	98128295	C	CAT	C3H	3	AT	NC_000072.7:94158372
chromosome_06	98713991	A	AAAAAC	C3H	1	AAAAC	NC_000072.7:94736395
chromosome_06	99895175	T	TTCTA	C3H	3	TCTA	NC_000072.7:95915392
chromosome_06	100677404	C	CAGAT	C3H	3	GATA	NC_000072.7:96696242
chromosome_06	101367553	C	CTTCT	C3H	3	TTTC	NC_000072.7:97386344
chromosome_06	104926333	G	GTCTA	C3H	2	TATC	NC_000072.7:100937390
chromosome_06	105029000	G	GCA	C3H	4	CA	NC_000072.7:101039522
chromosome_06	106507124	A	AAGAT	C3H	3	AGAT	NC_000072.7:102511924
chromosome_06	107323293	C	CAATAAT	C3H	2	AAT	NC_000072.7:103328074
chromosome_06	107824257	TTTA	T	C3H	3	TTA	NC_000072.7:103835970
chromosome_06	107841545	A	AAAAAT	C3H	1	AAAAT	NC_000072.7:103853258
chromosome_06	109697534	C	CACAT	C3H	2	ACACACAT	NC_000072.7:105743085
chromosome_06	109793652	TTATC	T	C3H	3	CTAT	NC_000072.7:105839444
chromosome_06	112446508	A	AATAG	C3H	3	ATAG	NC_000072.7:108506794
chromosome_06	112484503	GCTTT	G	C3H	2	CTTT	NC_000072.7:108547124
chromosome_06	112595628	A	AAGAT	C3H	3	AGAT	NC_000072.7:108650428
chromosome_06	113512104	CACTAT	C	C3H	3	ACTAT	NC_000072.7:109541864
chromosome_06	114591691	C	CTAGA	C3H	1	TAGA	NC_000072.7:110631680
chromosome_06	115148746	G	GTA	C3H	1		NC_000072.7:111184537
chromosome_06	115349879	GTAGA	G	C3H	3	ATAG
chromosome_06	115417154	C	CATAG	C3H	2	ATAG	NC_000072.7:111461302
chromosome_06	116720750	TGATG	T	C3H	3	GATG	NC_000072.7:112764800
chromosome_06	116881483	C	CGTTTT	C3H	3	GTTTT	NC_000072.7:112926684
chromosome_06	118937194	TATAA	T	C3H	4	ATAA	NC_000072.7:114916039
chromosome_06	118965131	GAATA	G	C3H	2	AATA	NC_000072.7:114943844
chromosome_06	119527576	GTGAA	G	C3H	3	TGAA	NC_000072.7:115498160
chromosome_06	119904569	AAAAT	A	C3H	3	AAAT	NC_000072.7:115886559
chromosome_06	120623820	GTATC	G	C3H	2	TATC	NC_000072.7:116623565
chromosome_06	120623886	TTCTA	T	C3H	4	TATC
chromosome_06	122067301	CACAT	C	C3H	2	ATAC	NC_000072.7:118077814
chromosome_06	122526852	C	CATCT	C3H	4	ATCT	NC_000072.7:118537322
chromosome_06	122830790	AAAGG	A	C3H	2	AGAA	NC_000072.7:118841148
chromosome_06	122941125	G	GATAC	C3H	1	ATAG
chromosome_06	123154369	C	CGAAG	C3H	1	GAAG	NC_000072.7:119163393
chromosome_06	123252818	CTGTG	C	C3H	4	TG	NC_000072.7:119261730
chromosome_06	124536138	C	CAGAT	C3H	4	AGAT	NC_000072.7:120533986
chromosome_06	124607847	T	TTTTC	C3H	3	TTTC	NC_000072.7:120606372
chromosome_06	125345382	T	TTATC	C3H	1	TCTATCTA	NC_000072.7:121343769
chromosome_06	125466316	T	TTCTA	C3H	3	TCTA	NC_000072.7:121464752
chromosome_06	125641578	T	TTCTA	C3H	4	TCTA	NC_000072.7:121638839
chromosome_06	127568090	CATCT	C	C3H	1	TCTA	NC_000072.7:123696329
chromosome_06	127870276	T	TATATAG	C3H	2	ATATAT	NC_000072.7:123998541
chromosome_06	127872415	G	GGGAA	C3H	4	AAGG	NC_000072.7:124000676
chromosome_06	128534506	C	CAGAT	C3H	3	AGAT	NC_000072.7:124661970
chromosome_06	128728665	TGATA	T	C3H	3	TAGA	NC_000072.7:124861655
chromosome_06	128833678	C	CCCGCCG	C3H	2	CCG	NC_000072.7:124973722
chromosome_06	130303690	CATAG	C	C3H	4	ATAG	NC_000072.7:126451645
chromosome_06	131011331	G	GTCTA	C3H	3	TCTA	NC_000072.7:127161893
chromosome_06	131193988	G	GGAAA	C3H	1	GAAG	NC_000072.7:127344424
chromosome_06	131929680	T	TGATA	C3H	2	TATACTGAGGTCTTGTTTCCAAAATAAATGATAGATAGATAGATAGATAGATAGA	NC_000072.7:128080560
chromosome_06	131977238	G	GTACA	C3H	4	TACA	NC_000072.7:128127850
chromosome_06	132044798	AAAGGAAGG	A	C3H	2	GAAG	NC_000072.7:128196794
chromosome_06	133339226	A	ATCTATC	C3H	2	TCTATC
chromosome_06	133636836	TTATC	T	C3H	4	TATC	NC_000072.7:129770507
chromosome_06	134899295	TAAATA	T	C3H	2	AAATA	NC_000072.7:131294009
chromosome_06	135146592	TTTTTC	T	C3H	3	TTTTC	NC_000072.7:131586390
chromosome_06	136349057	AAATT	A	C3H	4	AATT
chromosome_06	137652748	TGATA	T	C3H	4	AGAT	NC_000072.7:133936265
chromosome_06	138687108	A	AAAGGAGGG	C3H	3	GGAGGGAA
chromosome_06	138758496	G	GACAAA	C3H	4	CAAAA	NC_000072.7:135052555
chromosome_06	139345270	A	AATATGT	C3H	3	TATATG	NC_000072.7:135656354
chromosome_06	139644515	GAAGA	G	C3H	1	AAGG	NC_000072.7:135955557
chromosome_06	139873421	G	GGATA	C3H	4	GATA
chromosome_06	139926866	TGATA	T	C3H	2	AGAT	NC_000072.7:136225984
chromosome_06	140121300	A	AAGAAG	C3H	3	AGAAG	NC_000072.7:136403609
chromosome_06	140887838	CATCT	C	C3H	3	ATCT	NC_000072.7:137107049
chromosome_06	141687906	C	CTTAT	C3H	4	TTAT	NC_000072.7:137909018
chromosome_06	141904221	CATCT	C	C3H	1	ATCT	NC_000072.7:138125174
chromosome_06	141982714	ATATC	A	C3H	4	ACACACATATATGTAA	NC_000072.7:138203439
chromosome_06	142248883	TTATC	T	C3H	4	TATC	NC_000072.7:138469376
chromosome_06	142657483	TGATA	T	C3H	3	AGAT	NC_000072.7:138883633
chromosome_06	144098322	C	CAATA	C3H	4	AATA	NC_000072.7:140297978
chromosome_06	144374517	CTTTA	C	C3H	2	TTTA	NC_000072.7:140573305
chromosome_06	144427303	C	CACAT	C3H	4	CATA	NC_000072.7:140626103
chromosome_06	145043337	TCTTC	T	C3H	2	CTTT	NC_000072.7:141241414
chromosome_06	145310843	C	CATCT	C3H	3	TATC	NC_000072.7:141509073
chromosome_06	145769920	GAGAT	G	C3H	3	TAGA	NC_000072.7:141967798
chromosome_06	145784687	G	GTGTTT	C3H	2	TGTTT	NC_000072.7:141982575
chromosome_06	146068277	T	TGATA	C3H	4	ATAG	NC_000072.7:142265317
chromosome_06	146069262	A	AGTGAGTGT	C3H	2	GTGT	NC_000072.7:142266302
chromosome_06	146165056	G	GCACA	C3H	3	CA	NC_000072.7:142361849
chromosome_06	146686960	CTTAGG	C	C3H	4	TTAGG	NC_000072.7:142883457
chromosome_06	147166278	CATCT	C	C3H	4	TATC	NC_000072.7:143362616
chromosome_06	147241391	CATCT	C	C3H	4	ATCT	NC_000072.7:143436256
chromosome_06	147241873	C	CATCT	C3H	2	ATCT	NC_000072.7:143436758
chromosome_06	147609127	CAT	C	C3H	2		NC_000072.7:143803727
chromosome_06	147946780	CAGTT	C	C3H	3	AGTT	NC_000072.7:144141331
chromosome_06	148077726	C	CATAG	C3H	1	GATA
chromosome_06	148595379	TGATA	T	C3H	2	TAGA	NC_000072.7:144785887
chromosome_06	148941381	A	AATAG	C3H	1	ATAG	NC_000072.7:145130203
chromosome_06	149437298	C	CATAG	C3H	3	ATAG	NC_000072.7:145616399
chromosome_06	150858410	TTTA	T	C3H	2	TTA	NC_000072.7:147044286
chromosome_06	150952355	CCTAT	C	C3H	1	CTATCTAT	NC_000072.7:147138250
chromosome_06	150952419	CCTAT	C	C3H	4	CTATCTAT	NC_000072.7:147138314
chromosome_06	152841861	GAGAA	G	C3H	3	GAAA	NC_000072.7:149029068
chromosome_07	11148332	A	ACTT	C3H	1	CTC	NC_000073.7:3904515
chromosome_07	11694487	G	GAGGA	C3H	1	GAGG	NC_000073.7:4448884
chromosome_07	13314655	T	TGATA	C3H	2	GATA	NC_000073.7:6052022
chromosome_07	13625079	CATAA	C	C3H	4	ATAA	NC_000073.7:6362249
chromosome_07	14011367	GGAGA	G	C3H	2	GA	NC_000073.7:6751515
chromosome_07	14051799	TTAGA	T	C3H	1	TAGA	NC_000073.7:6791949
chromosome_07	14167706	AAACT	A	C3H	1	AACT	NC_000073.7:6907867
chromosome_07	16284643	A	AAT	C3H	2	AT	NC_000073.7:9024260
chromosome_07	19645872	TGATA	T	C3H	2	TAGA	NC_000073.7:12364933
chromosome_07	19700981	TATAG	T	C3H	1	AGAT	NC_000073.7:12419964
chromosome_07	23171307	CAGGA	C	C3H	2	AGAC
chromosome_07	23415280	AATAG	A	C3H	2	ATAG	NC_000073.7:15995735
chromosome_07	23950064	GTTTA	G	C3H	4	TTTA
chromosome_07	24078881	CATTT	C	C3H	3	ATTT	NC_000073.7:16659149
chromosome_07	24144324	GTTA	G	C3H	1	TTA	NC_000073.7:16724691
chromosome_07	24247698	GTCCA	G	C3H	2	TCCA	NC_000073.7:16822735
chromosome_07	24247813	TATCC	T	C3H	4	TCCA	NC_000073.7:16822842
chromosome_07	24278771	T	TTCTA	C3H	4	TCTA	NC_000073.7:16862973
chromosome_07	24728959	A	AATT	C3H	4	ATT	NC_000073.7:17472779
chromosome_07	24921108	ATATT	A	C3H	4	TATT	NC_000073.7:17695459
chromosome_07	24996106	TTGTGTG	T	C3H	4	TG	NC_000073.7:17771191
chromosome_07	25898238	ATTAT	A	C3H	4	TTTA	NC_000073.7:18648625
chromosome_07	25925365	CAGAT	C	C3H	1	AGAT	NC_000073.7:18675813
chromosome_07	26263123	TATAA	T	C3H	1	ATAA	NC_000073.7:19010465
chromosome_07	27055078	C	CATTT	C3H	1	ATTT	NC_000073.7:19798050
chromosome_07	27262227	C	CTATT	C3H	3	TATT	NC_000073.7:21620140
chromosome_07	27860907	C	CATTT	C3H	3	ATTT
chromosome_07	28001346	TTTTA	T	C3H	3	TTTA
chromosome_07	28158647	TTTTA	T	C3H	1	TTTA
chromosome_07	28357929	GAATA	G	C3H	1	AATA	NC_000073.7:22983485
chromosome_07	28740821	G	GGAAGAA	C3H	4	AG
chromosome_07	29345548	CTCTA	C	C3H	1	TCTA
chromosome_07	29671628	G	GAAAGGA	C3H	2	AAGG	NC_000073.7:24218661
chromosome_07	31162258	A	AATCT	C3H	4	ATCT	NC_000073.7:25713909
chromosome_07	31813748	GTTGA	G	C3H	3	TTGA	NC_000073.7:26364647
chromosome_07	31895069	C	CTG	C3H	1	TG	NC_000073.7:26445972
chromosome_07	31960879	TCTCA	T	C3H	1	CT	NC_000073.7:26511738
chromosome_07	33015733	CTG	C	C3H	2		NC_000073.7:27565327
chromosome_07	34866721	G	GATTT	C3H	4	ATTT	NC_000073.7:29417834
chromosome_07	35821134	G	GTAGA	C3H	4	TAGA	NC_000073.7:30371503
chromosome_07	36029542	A	AACACAC	C3H	1	AC	NC_000073.7:30579958
chromosome_07	36312104	C	CTTAT	C3H	2	TTAT	NC_000073.7:30862388
chromosome_07	36394297	GA	G	C3H	1		NC_000073.7:30944500
chromosome_07	40953081	G	GGTGT	C3H	4	GT	NC_000073.7:35721946
chromosome_07	41191035	T	TTATC	C3H	3	CTAT	NC_000073.7:35959793
chromosome_07	41876656	TGATA	T	C3H	2	GATA	NC_000073.7:36647441
chromosome_07	42557163	CATAG	C	C3H	2	ATAG	NC_000073.7:37335186
chromosome_07	44358042	G	GTCTA	C3H	4	TCTA	NC_000073.7:38979126
chromosome_07	45101549	AATCT	A	C3H	2	ATCT	NC_000073.7:39699667
chromosome_07	45963971	T	TGA	C3H	2	GA	NC_000073.7:40571848
chromosome_07	46202227	A	AATGG	C3H	4	ATAG	NC_000073.7:40810072
chromosome_07	46263243	TG	T	C3H	1		NC_000073.7:40870869
chromosome_07	46332840	G	GGATA	C3H	1	ATAG	NC_000073.7:40940458
chromosome_07	47025981	A	ACTAT	C3H	1	CTAT	NC_000073.7:41633439
chromosome_07	47419798	GTCTA	G	C3H	4	TCTA	NC_000073.7:42027243
chromosome_07	47754261	T	TAATA	C3H	3	AATA	NC_000073.7:42361688
chromosome_07	47902833	C	CCCTT	C3H	3	TCCC	NC_000073.7:42510265
chromosome_07	50908216	GTCTA	G	C3H	4	TATC
chromosome_07	52775475	A	ATTAT	C3H	2	TATT	NC_000073.7:47263899
chromosome_07	52909751	TATCC	T	C3H	2	ATCC	NC_000073.7:47398086
chromosome_07	52969684	GAAAT	G	C3H	4	AAAT	NC_000073.7:47457899
chromosome_07	55243466	T	TTATC	C3H	4	TATC	NC_000073.7:49740059
chromosome_07	55514705	A	AATAG	C3H	2	GATA	NC_000073.7:50026812
chromosome_07	55815210	G	GGATA	C3H	1	TAGA
chromosome_07	58048371	GT	G	C3H	4	TTTGTT	NC_000073.7:52526554
chromosome_07	58119674	CAATAAT	C	C3H	1	AAT
chromosome_07	58413907	T	TTA	C3H	3	TA	NC_000073.7:52877397
chromosome_07	60273172	A	ATG	C3H	1	TG	NC_000073.7:54807827
chromosome_07	61410713	C	CCTAT	C3H	4	CTAT	NC_000073.7:55948059
chromosome_07	61894019	A	AATCT	C3H	3	ATCT	NC_000073.7:56424173
chromosome_07	62162555	G	GATAA	C3H	3	ATAA	NC_000073.7:56693220
chromosome_07	62188746	CGATA	C	C3H	1	GATA	NC_000073.7:56719391
chromosome_07	62568089	TGATA	T	C3H	2	GATA	NC_000073.7:57100935
chromosome_07	63531543	AATTAT	A	C3H	2	ATTAT	NC_000073.7:58081489
chromosome_07	65222974	C	CATATGT	C3H	1	ATATGT	NC_000073.7:59616860
chromosome_07	65251126	A	AAT	C3H	4	TAATATTATATATAATA	NC_000073.7:59644960
chromosome_07	66978017	A	ATG	C3H	4		NC_000073.7:61466038
chromosome_07	68191678	CCT	C	C3H	2		NC_000073.7:62679785
chromosome_07	68673278	A	AATAG	C3H	3	GATA	NC_000073.7:63152171
chromosome_07	69898654	C	CGATA	C3H	3	GATA	NC_000073.7:64368608
chromosome_07	70623227	A	AAAT	C3H	2	AAT	NC_000073.7:65092269
chromosome_07	72320921	ATG	A	C3H	1	TG	NC_000073.7:66795280
chromosome_07	73906829	TACAC	T	C3H	2	AC	NC_000073.7:68375835
chromosome_07	74232946	AT	A	C3H	3	TTTCCATTTTTTATTTTTT
chromosome_07	76314516	T	TTTTATTTA	C3H	2	TTTA	NC_000073.7:70771711
chromosome_07	77802884	A	ATGTCTG	C3H	4	TGTCTG	NC_000073.7:72252386
chromosome_07	77925643	GGATA	G	C3H	1	GATA	NC_000073.7:72386143
chromosome_07	78010651	C	CTTAT	C3H	4	TTCCTTTC
chromosome_07	80269617	TTAGA	T	C3H	4	TAGA	NC_000073.7:74707966
chromosome_07	80511701	GGATA	G	C3H	4	ATAG	NC_000073.7:74956475
chromosome_07	81280962	C	CTCTA	C3H	4	TCTA	NC_000073.7:75739879
chromosome_07	81482400	GCTAT	G	C3H	3	CTAT	NC_000073.7:75947271
chromosome_07	82452071	A	AAGAT	C3H	2	AGAT	NC_000073.7:76901298
chromosome_07	83941806	T	TGATA	C3H	2	ATAG	NC_000073.7:78338902
chromosome_07	84266023	C	CAGAT	C3H	1	AGAT	NC_000073.7:78665984
chromosome_07	88221508	GATTT	G	C3H	1	ATTT	NC_000073.7:82623482
chromosome_07	88797492	TATACA	T	C3H	2	ATACA	NC_000073.7:83206257
chromosome_07	89546823	TTATC	T	C3H	1	TCTA
chromosome_07	89762001	GGCTGAGA	G	C3H	1	GCTGAGA	NC_000073.7:84169811
chromosome_07	89850263	TCTTC	T	C3H	1	CTTC	NC_000073.7:84258017
chromosome_07	91735742	C	CA	C3H	2	A	NC_000073.7:86189343
chromosome_07	91909391	GAAAAAAAAAAAAA	G	C3H	3	A
chromosome_07	93468124	AATAG	A	C3H	1	ATAG	NC_000073.7:87900255
chromosome_07	94822504	T	TGATA	C3H	1	AGAT	NC_000073.7:89263596
chromosome_07	97451406	TACACACACACAC	T	C3H	4	AC	NC_000073.7:91911017
chromosome_07	98649305	C	CATCT	C3H	2	ATCT	NC_000073.7:93112460
chromosome_07	99541710	G	GTAATAA	C3H	2	TAA	NC_000073.7:94011641
chromosome_07	100313298	G	GAATA	C3H	2	AATA	NC_000073.7:94770670
chromosome_07	101514683	TGATA	T	C3H	4	TAGA	NC_000073.7:95962647
chromosome_07	101882918	TTTTA	T	C3H	1	TTTA	NC_000073.7:96337376
chromosome_07	102654983	CGATA	C	C3H	2	GATA
chromosome_07	102916939	CTTAT	C	C3H	3	TTAT	NC_000073.7:97397719
chromosome_07	103356520	TCTTC	T	C3H	2	CTTC	NC_000073.7:97830112
chromosome_07	104014228	CCATA	C	C3H	2	CATA	NC_000073.7:98494616
chromosome_07	104164228	TTTCA	T	C3H	4	TTCA
chromosome_07	104519139	AAAT	A	C3H	3	AAT	NC_000073.7:98997186
chromosome_07	104777638	CATCT	C	C3H	2	TATC
chromosome_07	106010279	C	CTCCT	C3H	2	TCCT	NC_000073.7:100472218
chromosome_07	106807708	T	TGATA	C3H	3	AGAT	NC_000073.7:101260040
chromosome_07	107272203	A	AAAAT	C3H	2	AAAT	NC_000073.7:101723240
chromosome_07	108167452	C	CTAGTGG	C3H	4	TAGTGG	NC_000073.7:102626656
chromosome_07	108228765	GATTCT	G	C3H	2	ATTCT	NC_000073.7:102688004
chromosome_07	109379814	CATAA	C	C3H	3	ATAA	NC_000073.7:103820615
chromosome_07	110583271	CAGAT	C	C3H	3	AGAT	NC_000073.7:105122347
chromosome_07	110633672	G	GGATA	C3H	2	ATAG	NC_000073.7:105172713
chromosome_07	111247053	ATATT	A	C3H	2	TATT
chromosome_07	111409332	C	CCTAT	C3H	1	CTAT	NC_000073.7:106151766
chromosome_07	111482029	C	CAATA	C3H	4	AATA	NC_000073.7:106231338
chromosome_07	112052624	A	AAAT	C3H	4	AAT	NC_000073.7:106808086
chromosome_07	112614527	CATCT	C	C3H	3	ATCT	NC_000073.7:107390242
chromosome_07	114409999	A	AAAAGG	C3H	2	AGAA	NC_000073.7:109184409
chromosome_07	115823212	TGATA	T	C3H	3	GATA	NC_000073.7:110593887
chromosome_07	119284287	CTCTTT	C	C3H	3	TCTTT	NC_000073.7:114059699
chromosome_07	119465394	A	AGT	C3H	1	GT	NC_000073.7:114244701
chromosome_07	120760455	C	CAGAT	C3H	4	AGAT	NC_000073.7:115563131
chromosome_07	122030646	GGATA	G	C3H	3	GATA	NC_000073.7:116826124
chromosome_07	122221375	ATAAG	A	C3H	3	TAAG	NC_000073.7:117016790
chromosome_07	123415435	TTATC	T	C3H	2	TATC	NC_000073.7:118216282
chromosome_07	124062212	AAAAC	A	C3H	1	ACAA	NC_000073.7:118863540
chromosome_07	127587974	T	TTATC	C3H	2	TATC	NC_000073.7:122386739
chromosome_07	127683072	AATAG	A	C3H	2	ATAGATAG	NC_000073.7:122481820
chromosome_07	128185158	TTATCAGTGAGTACA	T	C3H	3		NC_000073.7:122983366
chromosome_07	129992641	G	GATAT	C3H	4	AT	NC_000073.7:124790157
chromosome_07	131118650	T	TGATA	C3H	3	ATAG	NC_000073.7:125915799
chromosome_07	131399286	C	CCTAT	C3H	4	CTAT	NC_000073.7:126196413
chromosome_07	132309533	AACAC	A	C3H	3	AC	NC_000073.7:127104947
chromosome_07	133284733	T	TGATA	C3H	4	AGAT	NC_000073.7:128067541
chromosome_07	133401979	C	CAATA	C3H	2	AATA	NC_000073.7:128183234
chromosome_07	135955126	TTATC	T	C3H	1	TCTA	NC_000073.7:130733931
chromosome_07	136043290	G	GGTATA	C3H	3	GTATA	NC_000073.7:130822083
chromosome_07	136079502	T	TCATA	C3H	4	CATA	NC_000073.7:130858287
chromosome_07	136530304	G	GTCTA	C3H	3	TCTA	NC_000073.7:131316313
chromosome_07	138597986	C	CTG	C3H	3	TG	NC_000073.7:133376642
chromosome_07	139298586	GAGAGA	G	C3H	1	AGAGA	NC_000073.7:134075636
chromosome_07	140093449	T	TTTA	C3H	1	TTA	NC_000073.7:134863256
chromosome_07	141091568	C	CCTAT	C3H	3	CTAT	NC_000073.7:135860005
chromosome_07	142277867	C	CATTT	C3H	4	ATTT	NC_000073.7:137045107
chromosome_07	142415645	A	AAT	C3H	4		NC_000073.7:137182885
chromosome_07	142852052	G	GACAC	C3H	2	AC	NC_000073.7:137619028
chromosome_07	144095754	AGGACGTGGTCTCT	A	C3H	4		NC_000073.7:138862945
chromosome_07	144390027	A	AAATAAT	C3H	1	AAT
chromosome_07	145149286	T	TTATC	C3H	2	TATC	NC_000073.7:139907360
chromosome_07	145531871	AATAG	A	C3H	1	GATA	NC_000073.7:140289929
chromosome_07	146204531	TTATC	T	C3H	1	TATC	NC_000073.7:140961789
chromosome_07	146987882	CCTTT	C	C3H	2	CTTT	NC_000073.7:141744787
chromosome_07	147220313	C	CTCTA	C3H	1	TCTA	NC_000073.7:141976729
chromosome_07	149107132	C	CCTTT	C3H	4	TCTT	NC_000073.7:143863951
chromosome_07	149763800	T	TTATC	C3H	4	TATC	NC_000073.7:144520402
chromosome_08	2846059	C	CATAG	C3H	2	ATAG	NC_000074.7:3258427
chromosome_08	3207894	A	AGAAG	C3H	2	AAGG	NC_000074.7:3618334
chromosome_08	3331402	T	TTCTA	C3H	1	TCTA	NC_000074.7:3741832
chromosome_08	3331488	CTCTA	C	C3H	2	TCTA	NC_000074.7:3741930
chromosome_08	3933600	T	TTATG	C3H	2	TATG	NC_000074.7:4344010
chromosome_08	5381568	T	TTATC	C3H	2	TATC	NC_000074.7:5791425
chromosome_08	5471820	T	TTATC	C3H	2	TATC	NC_000074.7:5881678
chromosome_08	6807549	T	TTATC	C3H	4	TCTA	NC_000074.7:7216554
chromosome_08	7278407	T	TTGGA	C3H	4	TGGA	NC_000074.7:7687402
chromosome_08	8737817	GATCT	G	C3H	3	ATCT	NC_000074.7:9147572
chromosome_08	8918754	CATCT	C	C3H	3	ATCT	NC_000074.7:9328515
chromosome_08	9143188	A	ATATC	C3H	2	ATCT	NC_000074.7:9552121
chromosome_08	9489249	AAAAAG	A	C3H	4	AAAAG	NC_000074.7:9897381
chromosome_08	10687787	C	CATCT	C3H	2	ATCT	NC_000074.7:11087845
chromosome_08	11588732	T	TTTTTC	C3H	4	TTTTC	NC_000074.7:11988082
chromosome_08	11707374	TTATC	T	C3H	2	ATCT	NC_000074.7:12106729
chromosome_08	13068613	GT	G	C3H	3		NC_000074.7:13466919
chromosome_08	14396516	G	GAGGA	C3H	4	GGGAAGGA	NC_000074.7:14784603
chromosome_08	14496202	GAGGA	G	C3H	4	AAGG	NC_000074.7:14887591
chromosome_08	15164247	G	GTCTA	C3H	4	TATC	NC_000074.7:15555620
chromosome_08	15701006	C	CTA	C3H	2	TC	NC_000074.7:16102723
chromosome_08	15724507	T	TTATAA	C3H	3	TATAA	NC_000074.7:16126420
chromosome_08	16207765	T	TA	C3H	3		NC_000074.7:16619767
chromosome_08	16992887	ATTATT	A	C3H	2	TTATT	NC_000074.7:17388043
chromosome_08	17191745	C	CATT	C3H	4	ATT	NC_000074.7:17592628
chromosome_08	17432606	CT	C	C3H	2		NC_000074.7:17833632
chromosome_08	17967866	CACAG	C	C3H	3	ACAG	NC_000074.7:18367490
chromosome_08	19324857	T	TTATAA	C3H	2	TATAA	NC_000074.7:19696607
chromosome_08	26269152	T	TCATA	C3H	2	CATA	NC_000074.7:22814115
chromosome_08	26499178	C	CTGTG	C3H	2	TG	NC_000074.7:23039941
chromosome_08	27681385	T	TTTA	C3H	2	TTA	NC_000074.7:24229488
chromosome_08	28685782	T	TATAC	C3H	4	ATAC	NC_000074.7:25236152
chromosome_08	30367919	G	GTCTA	C3H	4	TATC	NC_000074.7:26912801
chromosome_08	30996008	G	GTAGA	C3H	2	AGAT	NC_000074.7:27531324
chromosome_08	31316351	GTCTA	G	C3H	2	TCTA
chromosome_08	31617599	C	CTAA	C3H	1	TAA	NC_000074.7:28062191
chromosome_08	33318644	GT	G	C3H	2		NC_000074.7:29764023
chromosome_08	34717776	GGATA	G	C3H	2	GATA	NC_000074.7:31168189
chromosome_08	34800113	T	TGATA	C3H	4	ATAG	NC_000074.7:31250670
chromosome_08	34879563	T	TGATA	C3H	2	AGAT	NC_000074.7:31319149
chromosome_08	35669739	C	CCTCTT	C3H	2	CTTCCTCTTCT
chromosome_08	36672079	G	GAT	C3H	2	AT	NC_000074.7:33106318
chromosome_08	36938250	CAATA	C	C3H	4	AATA	NC_000074.7:33383795
chromosome_08	37066362	G	GGATA	C3H	1	GATA	NC_000074.7:33511825
chromosome_08	38234961	A	ATATC	C3H	1	ATCT	NC_000074.7:34660931
chromosome_08	38467263	A	ATATT	C3H	2	TATT
chromosome_08	38677619	GGACA	G	C3H	4	AGAT	NC_000074.7:35108872
chromosome_08	38688436	G	GTAGA	C3H	2	TAGA	NC_000074.7:35119627
chromosome_08	39636366	G	GTTCC	C3H	1	TTCC	NC_000074.7:36053099
chromosome_08	39693827	C	CGTGT	C3H	2	TG	NC_000074.7:36112421
chromosome_08	40684544	TG	T	C3H	1		NC_000074.7:37090881
chromosome_08	41060833	A	ATG	C3H	1	TG	NC_000074.7:37462094
chromosome_08	41111691	CATCT	C	C3H	4	TCTA	NC_000074.7:37511563
chromosome_08	41384492	T	TTCTA	C3H	2	ATCT	NC_000074.7:37772060
chromosome_08	43514488	C	CCCTT	C3H	2	CCTT	NC_000074.7:39933870
chromosome_08	46509949	TGATA	T	C3H	2	GATA	NC_000074.7:42960773
chromosome_08	48674661	T	TTAGA	C3H	2	TAGA	NC_000074.7:45124473
chromosome_08	49352915	A	ATATC	C3H	4	TATC	NC_000074.7:45802296
chromosome_08	49649147	GAAT	G	C3H	3	AAT	NC_000074.7:46098435
chromosome_08	50140745	A	AAGAAG	C3H	1	AGAAG	NC_000074.7:46584444
chromosome_08	50433057	C	CAGAT	C3H	3	AGAT	NC_000074.7:46876739
chromosome_08	51392289	T	TGATA	C3H	4	AGAT	NC_000074.7:47835595
chromosome_08	52419558	TTATC	T	C3H	4	ATCT	NC_000074.7:48849320
chromosome_08	52900318	C	CCCTT	C3H	4	CCTT	NC_000074.7:49329964
chromosome_08	52975300	C	CCTTT	C3H	2	CTTT	NC_000074.7:49404948
chromosome_08	53440490	C	CATCT	C3H	2	ATCT	NC_000074.7:49870009
chromosome_08	55242672	T	TTATC	C3H	4	TATC	NC_000074.7:51671832
chromosome_08	55262938	T	TTA	C3H	2	TA	NC_000074.7:51692078
chromosome_08	57461209	G	GATT	C3H	2	ATT	NC_000074.7:53890490
chromosome_08	58933742	G	GTCTA	C3H	1	TATC	NC_000074.7:55362085
chromosome_08	59967962	T	TATA	C3H	1	ATA	NC_000074.7:56398987
chromosome_08	60244766	GTGTGTGTGTGTC	G	C3H	2	GTGTGTGTGT	NC_000074.7:56686090
chromosome_08	60339321	GGGCATGA	G	C3H	2		NC_000074.7:56780631
chromosome_08	61746542	TTATC	T	C3H	2	TATC	NC_000074.7:58234501
chromosome_08	61849551	C	CATCT	C3H	1	ATCT	NC_000074.7:58335677
chromosome_08	62885805	C	CATCT	C3H	1	ATCT	NC_000074.7:59402236
chromosome_08	64403890	T	TGATA	C3H	1	TAGA	NC_000074.7:60923430
chromosome_08	65068317	T	TCA	C3H	4	CA	NC_000074.7:61596331
chromosome_08	67238554	A	AAC	C3H	4	CA	NC_000074.7:63747652
chromosome_08	68160419	C	CTCTG	C3H	4	TCTG	NC_000074.7:64660162
chromosome_08	69105490	C	CATCT	C3H	2	CTAT	NC_000074.7:65610207
chromosome_08	69231307	G	GTTTA	C3H	2	TTTA	NC_000074.7:65736130
chromosome_08	70186427	TA	T	C3H	3
chromosome_08	71332002	TG	T	C3H	4		NC_000074.7:67813542
chromosome_08	75389629	A	AAAAAC	C3H	4	AAAAC	NC_000074.7:71878442
chromosome_08	76196399	GAGGA	G	C3H	4	AGGA	NC_000074.7:72910037
chromosome_08	77956314	TTTTA	T	C3H	3	TTTA
[truncated: 2,001 more rows]
