# Supplementary material for: The rate and spectrum of new mutations in mice inferred by long-read sequencing
Source: HighWire-hosted journal article supplement (doi:10.1101/gr.279982.124), 2024-12-02
Supplement: Supplemental_Table_S5.xlsx [file Supplemental_Table_S5.xlsx]

## Sheet: table_sm
# Table S5. List of structural mutations (SMs) found in all mice samples and strains, with the corresponding type of SM. Coordinates are given by chromosome and position (with 0-based coordinates for the start site, and 1-based coordinates for the end site). Coordinates are strain-specific based on their respective reference genomes.
# When the SM was of type "Insertion Mobile", the type of insertion is given ('Retrocopy', or the type of transposable element).
# When the SM was of type "Deletion" or "Duplication", the presence of micro or macrohomology is given.
# Coordinates for the GRCm39 reference genome were obtained following the Minigraph-Cactus pangenome pipeline, and the halLiftover tool (see Methods).
CHROM	START	END	TYPE	STRAIN	SAMPLE	TYPE_INSERTION	HOMOLOGY	GRCm39_COORDINATES
chromosome_01	116075989	116075990	Insertion Mobile	BL6	5	L1		NC_000067.7:115350694-115350695
chromosome_01	170354267	170354268	Insertion Mobile	BL6	2	L1		NC_000067.7:169542206-169542207
chromosome_02	51192977	51192978	Insertion Mobile	BL6	2	L1		NC_000068.8:54155102-54155103
chromosome_02	145385694	145385695	Insertion Mobile	BL6	2	L1		NC_000068.8:148345497-148345498
chromosome_03	56925386	56925600	Contraction	BL6	3			NC_000069.7:59532828-59533036
chromosome_03	81923892	81923893	Expansion	BL6	2			NC_000069.7:84496200-84496201
chromosome_04	12338930	12339144	Contraction	BL6	2			NC_000070.7:14632991-14633205
chromosome_04	23773560	23773561	Expansion	BL6	4			NC_000070.7:26050308-26050309
chromosome_04	35048591	35048771	Contraction	BL6	2			NC_000070.7:37315486-37315666
chromosome_04	80705282	80705283	Insertion Mobile	BL6	4	B2		NC_000070.7:83421676-83421677
chromosome_04	104127364	104127938	Deletion	BL6	3		Microhomology	NC_000070.7:106807324-106807898
chromosome_04	104128000	104128489	Deletion	BL6	3		Microhomology	NC_000070.7:106807960-106808449
chromosome_06	35991515	35991516	Insertion Mobile	BL6	2	MaLR		NC_000072.7:38482144-38482145
chromosome_07	2020955	2021015	Contraction	BL6	2			NC_000073.7:4977190-4977250
chromosome_07	37253352	37253404	Contraction	BL6	2
chromosome_08	35878855	35878967	Contraction	BL6	4			NC_000074.7:37372869-37372981
chromosome_08	45967195	45967257	Contraction	BL6	3			NC_000074.7:47457428-47457490
chromosome_08	63431948	63432373	Contraction	BL6	5			NC_000074.7:64899589-64900014
chromosome_08	64695792	64696428	Contraction	BL6	2			NC_000074.7:66163246-66163882
chromosome_09	28701462	28701558	Contraction	BL6	5			NC_000075.7:31428729-31428825
chromosome_09	62825630	62825631	Insertion Mobile	BL6	5	B2		NC_000075.7:65512714-65512715
chromosome_09	88072379	88079141	Duplication	BL6	3		Macrohomology	NC_000075.7:90739755-90746517
chromosome_09	90234885	90235527	Contraction	BL6	3			NC_000075.7:92901944-92902586
chromosome_10	29744380	29744808	Contraction	BL6	2			NC_000076.7:32698734-32699162
chromosome_10	72499516	72499517	Insertion Mobile	BL6	2	B2		NC_000076.7:75423134-75423135
chromosome_11	9275720	9275721	Insertion Mobile	BL6	2	L1		NC_000077.7:12226243-12226244
chromosome_12	25084936	25084937	Insertion Mobile	BL6	4	L1		NC_000078.7:27963064-27963065
chromosome_12	42586701	42631972	Deletion	BL6	4		No homology	NC_000078.7:45436619-45472406
chromosome_12	60104315	60104527	Contraction	BL6	3			NC_000078.7:63006681-63006893
chromosome_12	79439755	79442748	Expansion	BL6	2			NC_000078.7:82328489-82328929
chromosome_13	93759005	93759006	Duplication	BL6	3		No homology	NC_000079.7:96017616-96017617
chromosome_13	117397559	117397560	Expansion	BL6	2			NC_000079.7:119625878-119625879
chromosome_15	11903893	11903947	Contraction	BL6	3			NC_000081.7:14306456-14306504
chromosome_15	61413121	61413122	Contraction	BL6	4			NC_000081.7:63741751-63741752
chromosome_15	90421862	90422076	Contraction	BL6	3			NC_000081.7:92711612-92711826
chromosome_16	75520685	75521113	Contraction	BL6	3			NC_000082.7:78147662-78148090
chromosome_17	21236915	21249530	Duplication	BL6	3		Macrohomology	NC_000083.7:22547098-22559713
chromosome_18	13732210	13732422	Contraction	BL6	2			NC_000084.7:16114514-16114726
chromosome_18	42812155	42812797	Contraction	BL6	3			NC_000084.7:45156297-45156939
chromosome_01	41288714	41288715	Insertion Mobile	C3H	1	ERV2		NC_000067.7:43480020-43480021
chromosome_01	50285218	50285430	Contraction	C3H	4			NC_000067.7:52439754-52439966
chromosome_01	89621682	89621683	Insertion Mobile	C3H	3	ERV2		NC_000067.7:89408653-89408654
chromosome_01	110513778	110513779	Insertion Mobile	C3H	3	ERV2		NC_000067.7:110345927-110345928
chromosome_01	120444088	120444163	Contraction	C3H	4			NC_000067.7:120286328-120286366
chromosome_01	123383800	123383801	Expansion	C3H	3			NC_000067.7:123231442-123231443
chromosome_02	76159856	76160026	Contraction	C3H	2			NC_000068.8:78987356-78987373
chromosome_02	152927062	152927063	Expansion	C3H	2
chromosome_03	51731473	51731474	Expansion	C3H	1
chromosome_03	73647910	73648199	Deletion	C3H	4		Microhomology	NC_000069.7:73527731-73528020
chromosome_03	102717798	102717799	Expansion	C3H	2			NC_000069.7:102112084-102112085
chromosome_03	102717798	102717799	Expansion	C3H	3			NC_000069.7:102112084-102112085
chromosome_03	111764207	111764208	Expansion	C3H	4
chromosome_03	117136015	117136016	Expansion	C3H	3			NC_000069.7:116530919-116530920
chromosome_04	89147657	89147658	Expansion	C3H	1			NC_000070.7:89182936-89182937
chromosome_04	89147657	89147658	Expansion	C3H	2			NC_000070.7:89182936-89182937
chromosome_04	89147657	89147658	Expansion	C3H	3			NC_000070.7:89182936-89182937
chromosome_04	89147657	89149097	Contraction	C3H	4			NC_000070.7:89182936-89182951
chromosome_04	95232426	95232427	Insertion Mobile	C3H	3	L1		NC_000070.7:95297412-95297413
chromosome_04	103421951	103421952	Insertion Mobile	C3H	4	L1		NC_000070.7:103446188-103446189
chromosome_04	115200627	115200628	Insertion Mobile	C3H	1	B2		NC_000070.7:116438303-116438304
chromosome_04	136911675	136911676	Expansion	C3H	1
chromosome_04	146456260	146456261	Insertion Mobile	C3H	1	B2		NC_000070.7:148284813-148284814
chromosome_05	51417762	51417763	Duplication	C3H	1		Macrohomology	NC_000071.7:48401289-48401290
chromosome_05	70610142	70611104	Deletion	C3H	4		Macrohomology	NC_000071.7:67568799-67569754
chromosome_05	116254702	116254754	Contraction	C3H	2
chromosome_06	63584563	63584763	Contraction	C3H	1			NC_000072.7:59620935-59621135
chromosome_06	77498163	77498759	Deletion	C3H	3		Macrohomology	NC_000072.7:73566928-73567496
chromosome_07	32449347	32450019	Contraction	C3H	2			NC_000073.7:27000104-27000105
chromosome_07	32449347	32449348	Expansion	C3H	3			NC_000073.7:27000104-27000112
chromosome_07	40086917	40087294	Contraction	C3H	1			NC_000073.7:34859214-34859224
chromosome_07	40086917	40087013	Contraction	C3H	2			NC_000073.7:34859214-34859224
chromosome_07	59362512	59362625	Deletion	C3H	3		No homology	NC_000073.7:53867353-53867466
chromosome_07	115086796	115086797	Insertion Mobile	C3H	2	ERV2		NC_000073.7:109858313-109858314
chromosome_08	40238450	40238451	Insertion Mobile	C3H	1	Retrocopy		NC_000074.7:36642669-36642670
chromosome_08	118367378	118367379	Duplication	C3H	3		No homology	NC_000074.7:115103893-115103894
chromosome_09	117464062	117464119	Contraction	C3H	2			NC_000075.7:114572674-114572682
chromosome_10	79638084	79638085	Insertion Mobile	C3H	1	B2		NC_000076.7:70697758-70697759
chromosome_10	108583464	108583465	Insertion Mobile	C3H	2	ERV2		NC_000076.7:99734498-99734499
chromosome_10	122063113	122063227	Contraction	C3H	3			NC_000076.7:113109436-113109446
chromosome_11	17974400	17974401	Insertion Mobile	C3H	2	ERV3		NC_000077.7:20453905-20453906
chromosome_11	57382641	57382642	Insertion Mobile	C3H	4	ERV2		NC_000077.7:59790375-59790376
chromosome_11	101822282	101822283	Insertion Mobile	C3H	4	ERV2		NC_000077.7:104010602-104010603
chromosome_12	62450812	62451236	Contraction	C3H	2
chromosome_12	98353195	98353196	Insertion Mobile	C3H	1	ERV2		NC_000078.7:98635173-98635174
chromosome_12	111230905	111230906	Insertion Mobile	C3H	3	ERV2		NC_000078.7:111559385-111559386
chromosome_12	118272492	118272493	Insertion Mobile	C3H	2	ERV2		NC_000078.7:118578903-118578904
chromosome_13	106296515	106296723	Contraction	C3H	1			NC_000079.7:106669238-106669446
chromosome_14	84502838	84502839	Insertion Mobile	C3H	4	ERV2		NC_000080.7:87575132-87575133
chromosome_14	114747140	114747141	Expansion	C3H	1
chromosome_16	11690573	11690574	Expansion	C3H	1			NC_000082.7:9174999-9175000
chromosome_16	15557201	15557202	Insertion Mobile	C3H	3	ERV2		NC_000082.7:13078978-13078979
chromosome_16	35341228	35341229	Insertion Mobile	C3H	1	B2		NC_000082.7:32881485-32881486
chromosome_17	2928873	2929333	Contraction	C3H	3			NC_000083.7:5208839-5209299
chromosome_17	3255459	3255460	Insertion Mobile	C3H	1	ERV2		NC_000083.7:5535314-5535315
chromosome_17	73570802	73571010	Contraction	C3H	4			NC_000083.7:75205463-75205671
chromosome_18	72036711	72036712	Expansion	C3H	2			NC_000084.7:72904818-72904819
chromosome_18	72702728	72702818	Contraction	C3H	1			NC_000084.7:73558959-73559038
chromosome_19	2941959	2941960	Insertion Mobile	C3H	1	B2		NC_000085.7:4683554-4683555
chromosome_X	42083274	42083918	Deletion	C3H	4		Microhomology	NC_000086.8:46879275-46879919
chromosome_X	160844295	160844296	Expansion	C3H	1
chromosome_01	4752696	4752697	Insertion Mobile	FVB	1	Retrocopy		NC_000067.7:6321821-6321822
chromosome_01	44554502	44554503	Expansion	FVB	3			NC_000067.7:46128128-46128129
chromosome_01	89544629	89544685	Contraction	FVB	1			NC_000067.7:88123081-88123137
chromosome_01	155562521	155562522	Insertion Mobile	FVB	1	L1		NC_000067.7:153901510-153901511
chromosome_01	157173787	157173788	Insertion Mobile	FVB	4	Retrocopy		NC_000067.7:155510397-155510398
chromosome_02	33107802	33108016	Contraction	FVB	3
chromosome_03	39457849	39457850	Insertion Mobile	FVB	1	L1		NC_000069.7:40328533-40328534
chromosome_03	51386244	51386245	Expansion	FVB	4			NC_000069.7:52236887-52236888
chromosome_03	72398136	72398137	Insertion Mobile	FVB	2	L1		NC_000069.7:73251653-73251654
chromosome_03	147076929	147077141	Contraction	FVB	4			NC_000069.7:146930735-146930947
chromosome_04	14764718	14764719	Expansion	FVB	2			NC_000070.7:17488043-17488044
chromosome_04	76429331	76431482	Deletion	FVB	2		Microhomology	NC_000070.7:79681084-79683235
chromosome_04	76432099	76432100	Duplication	FVB	2		Microhomology (presumed to be linked to above mutation)	NC_000070.7:79683852-79683853
chromosome_05	82181629	82181630	Insertion Mobile	FVB	3	L1		NC_000071.7:82945491-82945492
chromosome_06	115086285	115086286	Expansion	FVB	1			NC_000072.7:116457329-116457330
chromosome_06	134160207	134160208	Expansion	FVB	2			NC_000072.7:134848587-134848588
chromosome_07	47452499	47453114	Contraction	FVB	1			NC_000073.7:51711735-51712337
chromosome_07	85680545	85680546	Expansion	FVB	2
chromosome_07	140543185	140543186	Insertion Mobile	FVB	1	B2		NC_000073.7:144459522-144459523
chromosome_08	14215044	14221560	Deletion	FVB	2		No homology	NC_000074.7:16695037-16697573
chromosome_08	39011194	39011195	Insertion Mobile	FVB	4	L1		NC_000074.7:38420599-38420600
chromosome_09	70840130	70840131	Insertion Mobile	FVB	1	Retrocopy		NC_000075.7:72277186-72277187
chromosome_10	11540389	11540443	Contraction	FVB	3			NC_000076.7:14212059-14212080
chromosome_13	37673149	37673233	Contraction	FVB	3			NC_000079.7:40430457-40430521
chromosome_13	101795418	101795485	Contraction	FVB	4			NC_000079.7:102899613-102899680
chromosome_14	19932481	19932706	Deletion	FVB	4		Microhomology	NC_000080.7:22897314-22897539
chromosome_14	31253045	31253046	Insertion Mobile	FVB	1	B1		NC_000080.7:34213408-34213409
chromosome_16	62789882	62789883	Insertion Mobile	FVB	4	L1		NC_000082.7:65384195-65384196
chromosome_17	65467959	65467960	Insertion Mobile	FVB	1	B1		NC_000083.7:66730863-66730864
chromosome_17	67602712	67602713	Insertion Mobile	FVB	2	L1
chromosome_18	40996029	40996030	Insertion Mobile	FVB	1	L1		NC_000084.7:42911241-42911242
chromosome_X	91903010	91904503	Deletion	FVB	4		Macrohomology	NC_000086.8:90912504-90913997
chromosome_X	167715501	167715713	Contraction	FVB	2			NC_000086.8:168194514-168194726
